# Supplementary material for: Sexual Conflict and Gender Gap Effects: Associations between Social Context and Sex on Rated Attractiveness and Economic Status
Source: PLoS One. 2016 Jan 5;11(1):e0146269. doi: 10.1371/journal.pone.0146269 (PMC4701490; doi:10.1371/journal.pone.0146269)
Supplement: S2 File — The spreadsheet contains the data used to perform the analysis. (XLSX) [file pone.0146269.s002.xlsx]

## Sheet: Female Attractiveness
Subject	Condition	Model	Model ID	Treatment	Attractiveness	Participant Age	Educational Level	Country of Residence	Ethnicity	Participant Sex	Kinsey Scale	Model Age
1502	Condition 1	1a	1	a	60	49	Undergraduate University Degree	Austria	North Western European, British or Irish	Female	0- Exclusively heterosexual with no homosexual	32
1982	Condition 1	1a	1	a	55	40	Post Graduate University Degree	France	Southern European	Female	0- Exclusively heterosexual with no homosexual	32
309	Condition 1	1a	1	a	60	40	Undergraduate University Degree	Australia	North Western European, British or Irish	Female	0- Exclusively heterosexual with no homosexual	32
830	Condition 1	1a	1	a	70	40	Doctorate/PhD	United States	North Western European, British or Irish	Female	0- Exclusively heterosexual with no homosexual	32
28	Condition 1	1a	1	a	80	37	Post Graduate University Degree	Australia	North Western European, British or Irish	Female	0- Exclusively heterosexual with no homosexual	32
1129	Condition 1	1a	1	a	50	36	Undergraduate University Degree	United States	None of these define my ethnic group	Female	0- Exclusively heterosexual with no homosexual	32
1897	Condition 1	1a	1	a	80	36	Post Graduate University Degree	United States	European Mixed Race	Female	0- Exclusively heterosexual with no homosexual	32
960	Condition 1	1a	1	a	85	35	Undergraduate University Degree	United States	North Western European, British or Irish	Female	0- Exclusively heterosexual with no homosexual	32
59	Condition 1	1a	1	a	55	34	Undergraduate University Degree	Australia	Mixed Race Australian	Female	0- Exclusively heterosexual with no homosexual	32
1017	Condition 1	1a	1	a	75	34	Undergraduate University Degree	Canada	North Western European, British or Irish	Female	0- Exclusively heterosexual with no homosexual	32
571	Condition 1	1a	1	a	60	32	Diploma	Australia	North Western European, British or Irish	Female	0- Exclusively heterosexual with no homosexual	32
494	Condition 1	1a	1	a	85	32	Post Graduate University Degree	Isreal	None of these define my ethnic group	Female	0- Exclusively heterosexual with no homosexual	32
856	Condition 1	1a	1	a	60	31	Doctorate/PhD	Ireland	North Western European, British or Irish	Female	0- Exclusively heterosexual with no homosexual	32
1349	Condition 1	1a	1	a	60	31	Undergraduate University Degree	Germany	North Western European, British or Irish	Female	0- Exclusively heterosexual with no homosexual	32
124	Condition 1	1a	1	a	65	31	Undergraduate University Degree	Australia	European Mixed Race	Female	0- Exclusively heterosexual with no homosexual	32
1685	Condition 1	1a	1	a	85	31	Post Graduate University Degree	United States	European Mixed Race	Female	0- Exclusively heterosexual with no homosexual	32
1984	Condition 1	1a	1	a	40	30	Undergraduate University Degree	Other - Southern America	Central American	Female	0- Exclusively heterosexual with no homosexual	32
684	Condition 1	1a	1	a	60	30	Post Graduate University Degree	United States	North Western European, British or Irish	Female	0- Exclusively heterosexual with no homosexual	32
1431	Condition 1	1a	1	a	65	30	Undergraduate University Degree	Other - East European	South Eastern and Eastern European	Female	0- Exclusively heterosexual with no homosexual	32
1667	Condition 1	1a	1	a	85	30	Doctorate/PhD	Australia	North Western European, British or Irish	Female	0- Exclusively heterosexual with no homosexual	32
145	Condition 1	1a	1	a	35	29	Diploma	Australia	Other Asian or Mixed Race Asian	Female	0- Exclusively heterosexual with no homosexual	32
11	Condition 1	1a	1	a	60	29	Post Graduate University Degree	United States	Native North American or First Nation	Female	0- Exclusively heterosexual with no homosexual	32
708	Condition 1	1a	1	a	80	29	Undergraduate University Degree	United States	European Mixed Race	Female	0- Exclusively heterosexual with no homosexual	32
1086	Condition 1	1a	1	a	80	29	Undergraduate University Degree	United States	European Mixed Race	Female	0- Exclusively heterosexual with no homosexual	32
556	Condition 1	1a	1	a	75	28	Doctorate/PhD	United States	Other Central or South American or Mixed Race	Female	0- Exclusively heterosexual with no homosexual	32
935	Condition 1	1a	1	a	75	28	Undergraduate University Degree	Poland	South Eastern and Eastern European	Female	0- Exclusively heterosexual with no homosexual	32
1140	Condition 1	1a	1	a	75	26	Post Graduate University Degree	Chile	South American	Female	0- Exclusively heterosexual with no homosexual	32
1908	Condition 1	1a	1	a	45	25	Post Graduate University Degree	United States	European Mixed Race	Female	0- Exclusively heterosexual with no homosexual	32
900	Condition 1	1a	1	a	55	25	Diploma	United Kingdom	None of these define my ethnic group	Female	0- Exclusively heterosexual with no homosexual	32
1995	Condition 1	1a	1	a	70	25	Undergraduate University Degree	United States	None of these define my ethnic group	Female	0- Exclusively heterosexual with no homosexual	32
672	Condition 1	1a	1	a	75	25	Post Graduate University Degree	India	South East Asian	Female	0- Exclusively heterosexual with no homosexual	32
1732	Condition 1	1a	1	a	80	25	Post Graduate University Degree	Brazil	South Eastern and Eastern European	Female	0- Exclusively heterosexual with no homosexual	32
866	Condition 1	1a	1	a	55	24	Post Graduate University Degree	United Kingdom	European Mixed Race	Female	0- Exclusively heterosexual with no homosexual	32
600	Condition 1	1a	1	a	75	24	Post Graduate University Degree	Other - Asia	None of these define my ethnic group	Female	0- Exclusively heterosexual with no homosexual	32
560	Condition 1	1a	1	a	80	24	Undergraduate University Degree	Other - Middle East	European Mixed Race	Female	0- Exclusively heterosexual with no homosexual	32
1415	Condition 1	1a	1	a	70	23	Post Graduate University Degree	Italy	European Mixed Race	Female	0- Exclusively heterosexual with no homosexual	32
391	Condition 1	1a	1	a	75	23	Undergraduate University Degree	Canada	North Western European, British or Irish	Female	0- Exclusively heterosexual with no homosexual	32
875	Condition 1	1a	1	a	80	23	Undergraduate University Degree	Australia	South Eastern and Eastern European	Female	0- Exclusively heterosexual with no homosexual	32
414	Condition 1	1a	1	a	30	22	Undergraduate University Degree	Other - East European	South Eastern and Eastern European	Female	0- Exclusively heterosexual with no homosexual	32
953	Condition 1	1a	1	a	70	22	Undergraduate University Degree	Italy	European Mixed Race	Female	0- Exclusively heterosexual with no homosexual	32
878	Condition 1	1a	1	a	90	22	High School	Australia	Mixed Race Australian	Female	0- Exclusively heterosexual with no homosexual	32
864	Condition 1	1a	1	a	60	21	High School	United Kingdom	North Western European, British or Irish	Female	0- Exclusively heterosexual with no homosexual	32
370	Condition 1	1a	1	a	65	21	High School	Australia	North Western European, British or Irish	Female	0- Exclusively heterosexual with no homosexual	32
146	Condition 1	1a	1	a	75	21	Undergraduate University Degree	Australia	North Western European, British or Irish	Female	0- Exclusively heterosexual with no homosexual	32
1333	Condition 1	1a	1	a	90	21	Undergraduate University Degree	United States	European Mixed Race	Female	0- Exclusively heterosexual with no homosexual	32
304	Condition 1	1a	1	a	60	20	Undergraduate University Degree	Malaysia	Chinese Asian	Female	0- Exclusively heterosexual with no homosexual	32
1491	Condition 1	1a	1	a	65	20	Undergraduate University Degree	Brazil	South American	Female	0- Exclusively heterosexual with no homosexual	32
185	Condition 1	1a	1	a	70	20	Undergraduate University Degree	Australia	South East Asian	Female	0- Exclusively heterosexual with no homosexual	32
363	Condition 1	1a	1	a	60	19	High School	Australia	Other North-East Asian	Female	0- Exclusively heterosexual with no homosexual	32
396	Condition 1	1a	1	a	60	19	Diploma	United States	European Mixed Race	Female	0- Exclusively heterosexual with no homosexual	32
212	Condition 1	1a	1	a	80	19	Undergraduate University Degree	Australia	European Mixed Race	Female	0- Exclusively heterosexual with no homosexual	32
933	Condition 1	1a	1	a	80	19	High School	United States	European Mixed Race	Female	0- Exclusively heterosexual with no homosexual	32
323	Condition 1	1a	1	a	90	19	Undergraduate University Degree	Australia	North Western European, British or Irish	Female	0- Exclusively heterosexual with no homosexual	32
575	Condition 1	1a	1	a	50	18	Diploma	Isreal	South Eastern and Eastern European	Female	0- Exclusively heterosexual with no homosexual	32
1092	Condition 1	1a	1	a	50	18	Undergraduate University Degree	Portugal	Southern European	Female	0- Exclusively heterosexual with no homosexual	32
1678	Condition 1	1a	1	a	55	18	High School	United States	North Western European, British or Irish	Female	0- Exclusively heterosexual with no homosexual	32
1943	Condition 1	1a	1	a	60	18	High School	United States	North Western European, British or Irish	Female	0- Exclusively heterosexual with no homosexual	32
226	Condition 1	1a	1	a	65	18	Undergraduate University Degree	Australia	South Eastern and Eastern European	Female	0- Exclusively heterosexual with no homosexual	32
1141	Condition 1	1a	1	a	75	47	Undergraduate University Degree	United States	North Western European, British or Irish	Female	1- Predominantly heterosexual, only incidentally homosexual	32
1142	Condition 1	1a	1	a	65	41	Undergraduate University Degree	United States	None of these define my ethnic group	Female	1- Predominantly heterosexual, only incidentally homosexual	32
261	Condition 1	1a	1	a	80	40	Post Graduate University Degree	Australia	North Western European, British or Irish	Female	1- Predominantly heterosexual, only incidentally homosexual	32
1316	Condition 1	1a	1	a	95	40	Undergraduate University Degree	Canada	European Mixed Race	Female	1- Predominantly heterosexual, only incidentally homosexual	32
1602	Condition 1	1a	1	a	85	39	Post Graduate University Degree	United States	South Eastern and Eastern European	Female	1- Predominantly heterosexual, only incidentally homosexual	32
1441	Condition 1	1a	1	a	80	36	Undergraduate University Degree	Canada	Caribbean Islander	Female	1- Predominantly heterosexual, only incidentally homosexual	32
1361	Condition 1	1a	1	a	45	33	Other/Attending college	United States	European Mixed Race	Female	1- Predominantly heterosexual, only incidentally homosexual	32
35	Condition 1	1a	1	a	70	31	High School	United Kingdom	South Eastern and Eastern European	Female	1- Predominantly heterosexual, only incidentally homosexual	32
1186	Condition 1	1a	1	a	70	31	Undergraduate University Degree	United States	European Mixed Race	Female	1- Predominantly heterosexual, only incidentally homosexual	32
1150	Condition 1	1a	1	a	85	30	Diploma	United States	North Western European, British or Irish	Female	1- Predominantly heterosexual, only incidentally homosexual	32
1158	Condition 1	1a	1	a	50	29	Post Graduate University Degree	United States	None of these define my ethnic group	Female	1- Predominantly heterosexual, only incidentally homosexual	32
1964	Condition 1	1a	1	a	70	29	High School	United States	European Mixed Race	Female	1- Predominantly heterosexual, only incidentally homosexual	32
302	Condition 1	1a	1	a	75	29	Undergraduate University Degree	Australia	Mixed Race Australian	Female	1- Predominantly heterosexual, only incidentally homosexual	32
1382	Condition 1	1a	1	a	60	27	High School	United States	European Mixed Race	Female	1- Predominantly heterosexual, only incidentally homosexual	32
1857	Condition 1	1a	1	a	60	26	Post Graduate University Degree	Spain	European Mixed Race	Female	1- Predominantly heterosexual, only incidentally homosexual	32
731	Condition 1	1a	1	a	70	26	Undergraduate University Degree	Italy	North Western European, British or Irish	Female	1- Predominantly heterosexual, only incidentally homosexual	32
1216	Condition 1	1a	1	a	80	25	Undergraduate University Degree	United Kingdom	Southern Asian	Female	1- Predominantly heterosexual, only incidentally homosexual	32
83	Condition 1	1a	1	a	60	24	Undergraduate University Degree	Australia	North Western European, British or Irish	Female	1- Predominantly heterosexual, only incidentally homosexual	32
1139	Condition 1	1a	1	a	40	23	Undergraduate University Degree	United Kingdom	North Western European, British or Irish	Female	1- Predominantly heterosexual, only incidentally homosexual	32
1585	Condition 1	1a	1	a	65	23	Post Graduate University Degree	Other - East European	European Mixed Race	Female	1- Predominantly heterosexual, only incidentally homosexual	32
263	Condition 1	1a	1	a	70	23	Undergraduate University Degree	Australia	North Western European, British or Irish	Female	1- Predominantly heterosexual, only incidentally homosexual	32
735	Condition 1	1a	1	a	70	23	Undergraduate University Degree	Germany	North Western European, British or Irish	Female	1- Predominantly heterosexual, only incidentally homosexual	32
1478	Condition 1	1a	1	a	75	23	Undergraduate University Degree	United States	European Mixed Race	Female	1- Predominantly heterosexual, only incidentally homosexual	32
732	Condition 1	1a	1	a	50	22	Undergraduate University Degree	United Kingdom	North Western European, British or Irish	Female	1- Predominantly heterosexual, only incidentally homosexual	32
756	Condition 1	1a	1	a	65	22	Diploma	United States	North Western European, British or Irish	Female	1- Predominantly heterosexual, only incidentally homosexual	32
113	Condition 1	1a	1	a	90	22	Undergraduate University Degree	Australia	North Western European, British or Irish	Female	1- Predominantly heterosexual, only incidentally homosexual	32
1999	Condition 1	1a	1	a	50	21	High School	Canada	None of these define my ethnic group	Female	1- Predominantly heterosexual, only incidentally homosexual	32
820	Condition 1	1a	1	a	60	21	Diploma	Other - East European	South Eastern and Eastern European	Female	1- Predominantly heterosexual, only incidentally homosexual	32
228	Condition 1	1a	1	a	70	21	Undergraduate University Degree	Australia	North Western European, British or Irish	Female	1- Predominantly heterosexual, only incidentally homosexual	32
239	Condition 1	1a	1	a	80	21	Undergraduate University Degree	Australia	European Mixed Race	Female	1- Predominantly heterosexual, only incidentally homosexual	32
160	Condition 1	1a	1	a	55	20	Undergraduate University Degree	Australia	Chinese Asian	Female	1- Predominantly heterosexual, only incidentally homosexual	32
308	Condition 1	1a	1	a	55	20	High School	Australia	Southern Asian	Female	1- Predominantly heterosexual, only incidentally homosexual	32
452	Condition 1	1a	1	a	60	20	High School	Other - East European	South Eastern and Eastern European	Female	1- Predominantly heterosexual, only incidentally homosexual	32
1664	Condition 1	1a	1	a	70	20	High School	United States	Central American	Female	1- Predominantly heterosexual, only incidentally homosexual	32
576	Condition 1	1a	1	a	75	19	High School	United Kingdom	Chinese Asian	Female	1- Predominantly heterosexual, only incidentally homosexual	32
1731	Condition 1	1a	1	a	80	19	Undergraduate University Degree	Canada	Chinese Asian	Female	1- Predominantly heterosexual, only incidentally homosexual	32
429	Condition 1	1a	1	a	60	18	High School	Mexico	Central American	Female	1- Predominantly heterosexual, only incidentally homosexual	32
1562	Condition 1	1a	1	a	80	18	High School	Germany	Southern European	Female	1- Predominantly heterosexual, only incidentally homosexual	32
1098	Condition 1	1a	1	a	60	34	Undergraduate University Degree	United States	European Mixed Race	Female	2- Predominantly heterosexual, but more than incidentally homosexual	32
799	Condition 1	1a	1	a	65	32	Undergraduate University Degree	United States	Central American	Female	2- Predominantly heterosexual, but more than incidentally homosexual	32
1946	Condition 1	1a	1	a	60	30	Undergraduate University Degree	United States	European Mixed Race	Female	2- Predominantly heterosexual, but more than incidentally homosexual	32
1493	Condition 1	1a	1	a	35	29	High School	Mexico	Other Central or South American or Mixed Race	Female	2- Predominantly heterosexual, but more than incidentally homosexual	32
1324	Condition 1	1a	1	a	85	28	Undergraduate University Degree	United States	North Western European, British or Irish	Female	2- Predominantly heterosexual, but more than incidentally homosexual	32
1865	Condition 1	1a	1	a	80	26	Post Graduate University Degree	United Kingdom	South East Asian	Female	2- Predominantly heterosexual, but more than incidentally homosexual	32
235	Condition 1	1a	1	a	75	24	Undergraduate University Degree	Australia	Chinese Asian	Female	2- Predominantly heterosexual, but more than incidentally homosexual	32
1024	Condition 1	1a	1	a	70	23	Undergraduate University Degree	United States	North Western European, British or Irish	Female	2- Predominantly heterosexual, but more than incidentally homosexual	32
1531	Condition 1	1a	1	a	85	23	High School	Netherlands	Southern European	Female	2- Predominantly heterosexual, but more than incidentally homosexual	32
1115	Condition 1	1a	1	a	80	22	Undergraduate University Degree	United States	Southern European	Female	2- Predominantly heterosexual, but more than incidentally homosexual	32
1277	Condition 1	1a	1	a	45	21	High School	United States	North Western European, British or Irish	Female	2- Predominantly heterosexual, but more than incidentally homosexual	32
1229	Condition 1	1a	1	a	75	21	High School	New Zealand	European Mixed Race	Female	2- Predominantly heterosexual, but more than incidentally homosexual	32
1130	Condition 1	1a	1	a	90	21	Diploma	Germany	North Western European, British or Irish	Female	2- Predominantly heterosexual, but more than incidentally homosexual	32
461	Condition 1	1a	1	a	55	20	High School	Australia	North Western European, British or Irish	Female	2- Predominantly heterosexual, but more than incidentally homosexual	32
423	Condition 1	1a	1	a	40	19	High School	United States	Other Asian or Mixed Race Asian	Female	2- Predominantly heterosexual, but more than incidentally homosexual	32
1400	Condition 1	1a	1	a	100	18	High School	Chile	European Mixed Race	Female	2- Predominantly heterosexual, but more than incidentally homosexual	32
703	Condition 1	1a	1	a	85	40	Diploma	United States	None of these define my ethnic group	Female	3- Equally heterosexual and homosexual	32
1863	Condition 1	1a	1	a	80	37	Post Graduate University Degree	United States	South Eastern and Eastern European	Female	3- Equally heterosexual and homosexual	32
395	Condition 1	1a	1	a	90	33	Post Graduate University Degree	United States	None of these define my ethnic group	Female	3- Equally heterosexual and homosexual	32
1046	Condition 1	1a	1	a	55	26	Other/Technical Training + some college	United States	European Mixed Race	Female	3- Equally heterosexual and homosexual	32
696	Condition 1	1a	1	a	80	26	High School	United States	North Western European, British or Irish	Female	3- Equally heterosexual and homosexual	32
1262	Condition 1	1a	1	a	90	20	Undergraduate University Degree	Netherlands	None of these define my ethnic group	Female	3- Equally heterosexual and homosexual	32
1076	Condition 1	1b	1	b	50	48	Other/College Grad	Canada	North Western European, British or Irish	Female	0- Exclusively heterosexual with no homosexual	32
267	Condition 1	1b	1	b	70	47	Post Graduate University Degree	Australia	North Western European, British or Irish	Female	0- Exclusively heterosexual with no homosexual	32
1399	Condition 1	1b	1	b	60	45	Undergraduate University Degree	United States	North Western European, British or Irish	Female	0- Exclusively heterosexual with no homosexual	32
1245	Condition 1	1b	1	b	75	45	Post Graduate University Degree	United Arab Emirates	Other Central or South American or Mixed Race	Female	0- Exclusively heterosexual with no homosexual	32
513	Condition 1	1b	1	b	55	40	High School	Australia	North Western European, British or Irish	Female	0- Exclusively heterosexual with no homosexual	32
1201	Condition 1	1b	1	b	65	40	Undergraduate University Degree	Canada	North Western European, British or Irish	Female	0- Exclusively heterosexual with no homosexual	32
1613	Condition 1	1b	1	b	55	39	Diploma	United Kingdom	North Western European, British or Irish	Female	0- Exclusively heterosexual with no homosexual	32
352	Condition 1	1b	1	b	50	37	Undergraduate University Degree	United States	North Western European, British or Irish	Female	0- Exclusively heterosexual with no homosexual	32
332	Condition 1	1b	1	b	60	37	High School	Australia	North Western European, British or Irish	Female	0- Exclusively heterosexual with no homosexual	32
1884	Condition 1	1b	1	b	70	37	Undergraduate University Degree	United States	South Eastern and Eastern European	Female	0- Exclusively heterosexual with no homosexual	32
639	Condition 1	1b	1	b	30	35	Diploma	United Kingdom	None of these define my ethnic group	Female	0- Exclusively heterosexual with no homosexual	32
1985	Condition 1	1b	1	b	65	35	Undergraduate University Degree	Brazil	Southern European	Female	0- Exclusively heterosexual with no homosexual	32
327	Condition 1	1b	1	b	45	34	High School	Belgium	North Western European, British or Irish	Female	0- Exclusively heterosexual with no homosexual	32
1432	Condition 1	1b	1	b	55	34	Diploma	Canada	North Western European, British or Irish	Female	0- Exclusively heterosexual with no homosexual	32
1723	Condition 1	1b	1	b	75	34	Undergraduate University Degree	New Zealand	North Western European, British or Irish	Female	0- Exclusively heterosexual with no homosexual	32
1417	Condition 1	1b	1	b	50	33	Post Graduate University Degree	Other - Southern America	None of these define my ethnic group	Female	0- Exclusively heterosexual with no homosexual	32
1669	Condition 1	1b	1	b	65	33	Undergraduate University Degree	Egypt	North African or Middle Eastern Arab	Female	0- Exclusively heterosexual with no homosexual	32
1484	Condition 1	1b	1	b	70	33	Other/some college	United States	None of these define my ethnic group	Female	0- Exclusively heterosexual with no homosexual	32
923	Condition 1	1b	1	b	60	31	Undergraduate University Degree	Isreal	South American	Female	0- Exclusively heterosexual with no homosexual	32
1145	Condition 1	1b	1	b	65	31	Undergraduate University Degree	United States	None of these define my ethnic group	Female	0- Exclusively heterosexual with no homosexual	32
107	Condition 1	1b	1	b	55	30	Doctorate/PhD	China	None of these define my ethnic group	Female	0- Exclusively heterosexual with no homosexual	32
968	Condition 1	1b	1	b	55	30	Post Graduate University Degree	Brazil	South American	Female	0- Exclusively heterosexual with no homosexual	32
1256	Condition 1	1b	1	b	60	30	Post Graduate University Degree	Argentina	South American	Female	0- Exclusively heterosexual with no homosexual	32
913	Condition 1	1b	1	b	40	29	Undergraduate University Degree	Portugal	Southern European	Female	0- Exclusively heterosexual with no homosexual	32
314	Condition 1	1b	1	b	45	28	Undergraduate University Degree	Australia	Chinese Asian	Female	0- Exclusively heterosexual with no homosexual	32
8	Condition 1	1b	1	b	60	28	Undergraduate University Degree	Australia	North Western European, British or Irish	Female	0- Exclusively heterosexual with no homosexual	32
1426	Condition 1	1b	1	b	60	28	Undergraduate University Degree	United States	North Western European, British or Irish	Female	0- Exclusively heterosexual with no homosexual	32
1890	Condition 1	1b	1	b	75	28	Undergraduate University Degree	Malaysia	South East Asian	Female	0- Exclusively heterosexual with no homosexual	32
606	Condition 1	1b	1	b	15	27	Doctorate/PhD	Greece	South Eastern and Eastern European	Female	0- Exclusively heterosexual with no homosexual	32
1072	Condition 1	1b	1	b	50	27	Diploma	Portugal	None of these define my ethnic group	Female	0- Exclusively heterosexual with no homosexual	32
1215	Condition 1	1b	1	b	60	27	Undergraduate University Degree	Germany	North Western European, British or Irish	Female	0- Exclusively heterosexual with no homosexual	32
632	Condition 1	1b	1	b	65	27	Post Graduate University Degree	France	North Western European, British or Irish	Female	0- Exclusively heterosexual with no homosexual	32
636	Condition 1	1b	1	b	90	27	Undergraduate University Degree	United States	Native American Mixed Race	Female	0- Exclusively heterosexual with no homosexual	32
1365	Condition 1	1b	1	b	25	26	Doctorate/PhD	United States	European Mixed Race	Female	0- Exclusively heterosexual with no homosexual	32
827	Condition 1	1b	1	b	45	26	Diploma	United States	None of these define my ethnic group	Female	0- Exclusively heterosexual with no homosexual	32
1341	Condition 1	1b	1	b	55	26	High School	Canada	European Mixed Race	Female	0- Exclusively heterosexual with no homosexual	32
109	Condition 1	1b	1	b	60	26	Doctorate/PhD	China	Chinese Asian	Female	0- Exclusively heterosexual with no homosexual	32
1338	Condition 1	1b	1	b	75	26	Post Graduate University Degree	Chile	South American	Female	0- Exclusively heterosexual with no homosexual	32
439	Condition 1	1b	1	b	45	24	Undergraduate University Degree	Taiwan	Chinese Asian	Female	0- Exclusively heterosexual with no homosexual	32
725	Condition 1	1b	1	b	55	24	Undergraduate University Degree	United States	Chinese Asian	Female	0- Exclusively heterosexual with no homosexual	32
476	Condition 1	1b	1	b	70	24	Undergraduate University Degree	United States	European Mixed Race	Female	0- Exclusively heterosexual with no homosexual	32
925	Condition 1	1b	1	b	55	23	Undergraduate University Degree	Portugal	Southern European	Female	0- Exclusively heterosexual with no homosexual	32
1546	Condition 1	1b	1	b	85	23	Undergraduate University Degree	United Kingdom	North Western European, British or Irish	Female	0- Exclusively heterosexual with no homosexual	32
959	Condition 1	1b	1	b	50	22	Undergraduate University Degree	Germany	North Western European, British or Irish	Female	0- Exclusively heterosexual with no homosexual	32
876	Condition 1	1b	1	b	60	22	Diploma	Italy	Southern European	Female	0- Exclusively heterosexual with no homosexual	32
2011	Condition 1	1b	1	b	60	22	Undergraduate University Degree	United States	North Western European, British or Irish	Female	0- Exclusively heterosexual with no homosexual	32
497	Condition 1	1b	1	b	70	22	Diploma	United States	Central American	Female	0- Exclusively heterosexual with no homosexual	32
1578	Condition 1	1b	1	b	80	22	Undergraduate University Degree	United States	European Mixed Race	Female	0- Exclusively heterosexual with no homosexual	32
1623	Condition 1	1b	1	b	5	21	Undergraduate University Degree	Other - Middle East	South East Asian	Female	0- Exclusively heterosexual with no homosexual	32
527	Condition 1	1b	1	b	30	21	Undergraduate University Degree	United States	European Mixed Race	Female	0- Exclusively heterosexual with no homosexual	32
1903	Condition 1	1b	1	b	35	21	Diploma	United States	North Western European, British or Irish	Female	0- Exclusively heterosexual with no homosexual	32
983	Condition 1	1b	1	b	60	21	Undergraduate University Degree	United States	European Mixed Race	Female	0- Exclusively heterosexual with no homosexual	32
1499	Condition 1	1b	1	b	60	21	Undergraduate University Degree	Germany	North Western European, British or Irish	Female	0- Exclusively heterosexual with no homosexual	32
1647	Condition 1	1b	1	b	65	21	Undergraduate University Degree	United Kingdom	North Western European, British or Irish	Female	0- Exclusively heterosexual with no homosexual	32
376	Condition 1	1b	1	b	70	21	Undergraduate University Degree	United States	European Mixed Race	Female	0- Exclusively heterosexual with no homosexual	32
1791	Condition 1	1b	1	b	80	21	Undergraduate University Degree	United States	North Western European, British or Irish	Female	0- Exclusively heterosexual with no homosexual	32
1397	Condition 1	1b	1	b	45	20	Undergraduate University Degree	Portugal	Southern European	Female	0- Exclusively heterosexual with no homosexual	32
201	Condition 1	1b	1	b	55	20	Undergraduate University Degree	Australia	North Western European, British or Irish	Female	0- Exclusively heterosexual with no homosexual	32
814	Condition 1	1b	1	b	65	20	Undergraduate University Degree	Australia	European Mixed Race	Female	0- Exclusively heterosexual with no homosexual	32
1489	Condition 1	1b	1	b	65	20	Undergraduate University Degree	United States	North Western European, British or Irish	Female	0- Exclusively heterosexual with no homosexual	32
155	Condition 1	1b	1	b	25	19	High School	Australia	North Western European, British or Irish	Female	0- Exclusively heterosexual with no homosexual	32
1146	Condition 1	1b	1	b	50	19	Undergraduate University Degree	Australia	North Western European, British or Irish	Female	0- Exclusively heterosexual with no homosexual	32
1249	Condition 1	1b	1	b	55	19	Undergraduate University Degree	India	Southern Asian	Female	0- Exclusively heterosexual with no homosexual	32
316	Condition 1	1b	1	b	55	18	Undergraduate University Degree	Australia	Southern Asian	Female	0- Exclusively heterosexual with no homosexual	32
151	Condition 1	1b	1	b	70	18	Undergraduate University Degree	Australia	Southern Asian	Female	0- Exclusively heterosexual with no homosexual	32
474	Condition 1	1b	1	b	80	34	Post Graduate University Degree	Germany	North Western European, British or Irish	Female	0- Exclusively heterosexual with no homosexual, 1- Predominantly heterosexual, only incidentally homosexual	32
1570	Condition 1	1b	1	b	60	22	High School	Mexico	Other Asian or Mixed Race Asian	Female	0- Exclusively heterosexual with no homosexual, 1- Predominantly heterosexual, only incidentally homosexual	32
1825	Condition 1	1b	1	b	50	22	Undergraduate University Degree	United States	European Mixed Race	Female	0- Exclusively heterosexual with no homosexual, 1- Predominantly heterosexual, only incidentally homosexual, 2- Predominantly heterosexual, but more than incidentally homosexual, 3- Equally heterosexual and homosexual, 4- Predominantly homosexual, but more than incidentally heterosexual, 5- Predominantly homosexual, only incidentally heterosexual, 6- Exclusively homosexual	32
899	Condition 1	1b	1	b	55	45	Post Graduate University Degree	Australia	North Western European, British or Irish	Female	1- Predominantly heterosexual, only incidentally homosexual	32
1512	Condition 1	1b	1	b	75	45	Undergraduate University Degree	United States	North Western European, British or Irish	Female	1- Predominantly heterosexual, only incidentally homosexual	32
1971	Condition 1	1b	1	b	65	37	Post Graduate University Degree	United States	South Eastern and Eastern European	Female	1- Predominantly heterosexual, only incidentally homosexual	32
865	Condition 1	1b	1	b	50	36	Undergraduate University Degree	Denmark	European Mixed Race	Female	1- Predominantly heterosexual, only incidentally homosexual	32
1131	Condition 1	1b	1	b	50	34	Undergraduate University Degree	United States	North Western European, British or Irish	Female	1- Predominantly heterosexual, only incidentally homosexual	32
1617	Condition 1	1b	1	b	60	32	Diploma	Canada	North Western European, British or Irish	Female	1- Predominantly heterosexual, only incidentally homosexual	32
970	Condition 1	1b	1	b	75	31	High School	Isreal	North African or Middle Eastern Jewish	Female	1- Predominantly heterosexual, only incidentally homosexual	32
689	Condition 1	1b	1	b	80	31	Undergraduate University Degree	Australia	North Western European, British or Irish	Female	1- Predominantly heterosexual, only incidentally homosexual	32
949	Condition 1	1b	1	b	85	31	Undergraduate University Degree	United States	None of these define my ethnic group	Female	1- Predominantly heterosexual, only incidentally homosexual	32
1407	Condition 1	1b	1	b	40	30	Undergraduate University Degree	United States	European Mixed Race	Female	1- Predominantly heterosexual, only incidentally homosexual	32
1290	Condition 1	1b	1	b	60	30	Other/Trade School	United States	South Eastern and Eastern European	Female	1- Predominantly heterosexual, only incidentally homosexual	32
808	Condition 1	1b	1	b	55	29	Post Graduate University Degree	France	Southern European	Female	1- Predominantly heterosexual, only incidentally homosexual	32
612	Condition 1	1b	1	b	65	29	Diploma	Germany	South Eastern and Eastern European	Female	1- Predominantly heterosexual, only incidentally homosexual	32
23	Condition 1	1b	1	b	45	28	Undergraduate University Degree	Australia	Other Asian or Mixed Race Asian	Female	1- Predominantly heterosexual, only incidentally homosexual	32
1648	Condition 1	1b	1	b	20	27	Undergraduate University Degree	United States	North Western European, British or Irish	Female	1- Predominantly heterosexual, only incidentally homosexual	32
441	Condition 1	1b	1	b	35	27	Undergraduate University Degree	United Kingdom	North Western European, British or Irish	Female	1- Predominantly heterosexual, only incidentally homosexual	32
1642	Condition 1	1b	1	b	55	27	High School	Austria	European Mixed Race	Female	1- Predominantly heterosexual, only incidentally homosexual	32
1624	Condition 1	1b	1	b	60	27	Post Graduate University Degree	Chile	European Mixed Race	Female	1- Predominantly heterosexual, only incidentally homosexual	32
61	Condition 1	1b	1	b	65	27	Undergraduate University Degree	Australia	North Western European, British or Irish	Female	1- Predominantly heterosexual, only incidentally homosexual	32
324	Condition 1	1b	1	b	45	26	Undergraduate University Degree	United Kingdom	North Western European, British or Irish	Female	1- Predominantly heterosexual, only incidentally homosexual	32
1649	Condition 1	1b	1	b	55	26	Undergraduate University Degree	Australia	New Zealand Peoples	Female	1- Predominantly heterosexual, only incidentally homosexual	32
1253	Condition 1	1b	1	b	60	25	Diploma	United States	None of these define my ethnic group	Female	1- Predominantly heterosexual, only incidentally homosexual	32
393	Condition 1	1b	1	b	65	25	Undergraduate University Degree	Brazil	Other Central or South American or Mixed Race	Female	1- Predominantly heterosexual, only incidentally homosexual	32
785	Condition 1	1b	1	b	65	25	Undergraduate University Degree	Norway	North Western European, British or Irish	Female	1- Predominantly heterosexual, only incidentally homosexual	32
1740	Condition 1	1b	1	b	30	24	High School	United States	Southern European	Female	1- Predominantly heterosexual, only incidentally homosexual	32
1020	Condition 1	1b	1	b	35	24	Post Graduate University Degree	Netherlands	European Mixed Race	Female	1- Predominantly heterosexual, only incidentally homosexual	32
1252	Condition 1	1b	1	b	60	24	Undergraduate University Degree	Canada	North Western European, British or Irish	Female	1- Predominantly heterosexual, only incidentally homosexual	32
1780	Condition 1	1b	1	b	60	24	Undergraduate University Degree	United States	Chinese Asian	Female	1- Predominantly heterosexual, only incidentally homosexual	32
134	Condition 1	1b	1	b	15	23	High School	Australia	North Western European, British or Irish	Female	1- Predominantly heterosexual, only incidentally homosexual	32
1889	Condition 1	1b	1	b	35	23	Doctorate/PhD	United States	Southern Asian	Female	1- Predominantly heterosexual, only incidentally homosexual	32
1497	Condition 1	1b	1	b	55	23	Undergraduate University Degree	United States	European Mixed Race	Female	1- Predominantly heterosexual, only incidentally homosexual	32
413	Condition 1	1b	1	b	60	23	Diploma	United States	European Mixed Race	Female	1- Predominantly heterosexual, only incidentally homosexual	32
1861	Condition 1	1b	1	b	60	23	Undergraduate University Degree	Spain	North Western European, British or Irish	Female	1- Predominantly heterosexual, only incidentally homosexual	32
1626	Condition 1	1b	1	b	65	23	Undergraduate University Degree	United Kingdom	North Western European, British or Irish	Female	1- Predominantly heterosexual, only incidentally homosexual	32
20	Condition 1	1b	1	b	70	23	Undergraduate University Degree	Australia	South East Asian	Female	1- Predominantly heterosexual, only incidentally homosexual	32
297	Condition 1	1b	1	b	75	23	Undergraduate University Degree	Australia	North Western European, British or Irish	Female	1- Predominantly heterosexual, only incidentally homosexual	32
289	Condition 1	1b	1	b	90	23	Undergraduate University Degree	Australia	South East Asian	Female	1- Predominantly heterosexual, only incidentally homosexual	32
3	Condition 1	1b	1	b	60	22	Undergraduate University Degree	Australia	Southern Asian	Female	1- Predominantly heterosexual, only incidentally homosexual	32
1809	Condition 1	1b	1	b	10	20	Diploma	New Zealand	New Zealand Peoples	Female	1- Predominantly heterosexual, only incidentally homosexual	32
1055	Condition 1	1b	1	b	35	20	High School	Ireland	North Western European, British or Irish	Female	1- Predominantly heterosexual, only incidentally homosexual	32
813	Condition 1	1b	1	b	45	20	Undergraduate University Degree	Ireland	North Western European, British or Irish	Female	1- Predominantly heterosexual, only incidentally homosexual	32
213	Condition 1	1b	1	b	55	20	Undergraduate University Degree	Australia	Chinese Asian	Female	1- Predominantly heterosexual, only incidentally homosexual	32
1311	Condition 1	1b	1	b	55	20	Undergraduate University Degree	United States	None of these define my ethnic group	Female	1- Predominantly heterosexual, only incidentally homosexual	32
656	Condition 1	1b	1	b	70	20	High School	Czech Republic	European Mixed Race	Female	1- Predominantly heterosexual, only incidentally homosexual	32
1439	Condition 1	1b	1	b	80	20	Undergraduate University Degree	United Kingdom	North Western European, British or Irish	Female	1- Predominantly heterosexual, only incidentally homosexual	32
1702	Condition 1	1b	1	b	45	19	High School	Portugal	Southern European	Female	1- Predominantly heterosexual, only incidentally homosexual	32
1956	Condition 1	1b	1	b	55	19	High School	United States	European Mixed Race	Female	1- Predominantly heterosexual, only incidentally homosexual	32
749	Condition 1	1b	1	b	70	19	High School	United Kingdom	North Western European, British or Irish	Female	1- Predominantly heterosexual, only incidentally homosexual	32
353	Condition 1	1b	1	b	60	18	High School	Other - Southern Europe	South Eastern and Eastern European	Female	1- Predominantly heterosexual, only incidentally homosexual	32
1358	Condition 1	1b	1	b	60	36	High School	United States	European Mixed Race	Female	2- Predominantly heterosexual, but more than incidentally homosexual	32
1230	Condition 1	1b	1	b	65	31	Undergraduate University Degree	United States	European Mixed Race	Female	2- Predominantly heterosexual, but more than incidentally homosexual	32
407	Condition 1	1b	1	b	50	26	Undergraduate University Degree	Finland	North Western European, British or Irish	Female	2- Predominantly heterosexual, but more than incidentally homosexual	32
1122	Condition 1	1b	1	b	35	25	Undergraduate University Degree	United States	European Mixed Race	Female	2- Predominantly heterosexual, but more than incidentally homosexual	32
221	Condition 1	1b	1	b	30	24	Undergraduate University Degree	Australia	Mixed Race Australian	Female	2- Predominantly heterosexual, but more than incidentally homosexual	32
147	Condition 1	1b	1	b	65	24	Undergraduate University Degree	Australia	North Western European, British or Irish	Female	2- Predominantly heterosexual, but more than incidentally homosexual	32
535	Condition 1	1b	1	b	60	23	Undergraduate University Degree	United States	European Mixed Race	Female	2- Predominantly heterosexual, but more than incidentally homosexual	32
1593	Condition 1	1b	1	b	40	22	Diploma	United States	North Western European, British or Irish	Female	2- Predominantly heterosexual, but more than incidentally homosexual	32
1646	Condition 1	1b	1	b	55	22	Diploma	United States	Southern Asian	Female	2- Predominantly heterosexual, but more than incidentally homosexual	32
924	Condition 1	1b	1	b	30	20	Undergraduate University Degree	United Kingdom	North Western European, British or Irish	Female	2- Predominantly heterosexual, but more than incidentally homosexual	32
230	Condition 1	1b	1	b	50	20	Undergraduate University Degree	Australia	Mixed Race Australian	Female	2- Predominantly heterosexual, but more than incidentally homosexual	32
511	Condition 1	1b	1	b	70	20	Undergraduate University Degree	United States	North Western European, British or Irish	Female	2- Predominantly heterosexual, but more than incidentally homosexual	32
1175	Condition 1	1b	1	b	70	20	High School	United States	None of these define my ethnic group	Female	2- Predominantly heterosexual, but more than incidentally homosexual	32
996	Condition 1	1b	1	b	40	18	High School	Croatia	None of these define my ethnic group	Female	2- Predominantly heterosexual, but more than incidentally homosexual	32
1855	Condition 1	1b	1	b	70	35	High School	United States	Southern European	Female	3- Equally heterosexual and homosexual	32
516	Condition 1	1b	1	b	50	27	Diploma	Serbia	Southern European	Female	3- Equally heterosexual and homosexual	32
1534	Condition 1	1b	1	b	65	26	High School	United States	Native North American or First Nation	Female	3- Equally heterosexual and homosexual	32
41	Condition 1	1b	1	b	40	23	Other/College	Australia	North Western European, British or Irish	Female	3- Equally heterosexual and homosexual	32
605	Condition 1	1b	1	b	40	20	Diploma	United States	European Mixed Race	Female	3- Equally heterosexual and homosexual	32
1053	Condition 1	1c	1	c	90	51	Undergraduate University Degree	United States	South Eastern and Eastern European	Female	0- Exclusively heterosexual with no homosexual	32
278	Condition 1	1c	1	c	55	49	Diploma	Australia	Mixed Race Australian	Female	0- Exclusively heterosexual with no homosexual	32
122	Condition 1	1c	1	c	45	46	Undergraduate University Degree	Australia	None of these define my ethnic group	Female	0- Exclusively heterosexual with no homosexual	32
268	Condition 1	1c	1	c	75	45	Undergraduate University Degree	Australia	North Western European, British or Irish	Female	0- Exclusively heterosexual with no homosexual	32
579	Condition 1	1c	1	c	80	45	Undergraduate University Degree	United States	North Western European, British or Irish	Female	0- Exclusively heterosexual with no homosexual	32
1480	Condition 1	1c	1	c	45	44	Undergraduate University Degree	United States	North Western European, British or Irish	Female	0- Exclusively heterosexual with no homosexual	32
1929	Condition 1	1c	1	c	65	44	Undergraduate University Degree	United States	European Mixed Race	Female	0- Exclusively heterosexual with no homosexual	32
1052	Condition 1	1c	1	c	70	42	Other/3 years college	United States	European Mixed Race	Female	0- Exclusively heterosexual with no homosexual	32
1892	Condition 1	1c	1	c	60	39	Post Graduate University Degree	Other - Southern America	Other Central or South American or Mixed Race	Female	0- Exclusively heterosexual with no homosexual	32
673	Condition 1	1c	1	c	45	38	Post Graduate University Degree	Sweden	North Western European, British or Irish	Female	0- Exclusively heterosexual with no homosexual	32
1605	Condition 1	1c	1	c	65	38	Doctorate/PhD	United States	European Mixed Race	Female	0- Exclusively heterosexual with no homosexual	32
1834	Condition 1	1c	1	c	40	36	Post Graduate University Degree	United Arab Emirates	South American	Female	0- Exclusively heterosexual with no homosexual	32
1887	Condition 1	1c	1	c	55	33	Doctorate/PhD	Portugal	European Mixed Race	Female	0- Exclusively heterosexual with no homosexual	32
1368	Condition 1	1c	1	c	50	32	Undergraduate University Degree	United States	Central American	Female	0- Exclusively heterosexual with no homosexual	32
927	Condition 1	1c	1	c	60	31	Undergraduate University Degree	United Kingdom	South Eastern and Eastern European	Female	0- Exclusively heterosexual with no homosexual	32
963	Condition 1	1c	1	c	75	31	Post Graduate University Degree	United Kingdom	North Western European, British or Irish	Female	0- Exclusively heterosexual with no homosexual	32
1118	Condition 1	1c	1	c	85	31	Post Graduate University Degree	United Kingdom	North Western European, British or Irish	Female	0- Exclusively heterosexual with no homosexual	32
1202	Condition 1	1c	1	c	65	30	Undergraduate University Degree	United States	North Western European, British or Irish	Female	0- Exclusively heterosexual with no homosexual	32
1822	Condition 1	1c	1	c	95	30	Undergraduate University Degree	United States	South Eastern and Eastern European	Female	0- Exclusively heterosexual with no homosexual	32
2002	Condition 1	1c	1	c	55	29	Doctorate/PhD	New Zealand	Chinese Asian	Female	0- Exclusively heterosexual with no homosexual	32
1719	Condition 1	1c	1	c	75	29	Undergraduate University Degree	United States	Native American Mixed Race	Female	0- Exclusively heterosexual with no homosexual	32
1986	Condition 1	1c	1	c	50	28	Doctorate/PhD	United Kingdom	Southern and East Africa	Female	0- Exclusively heterosexual with no homosexual	32
12	Condition 1	1c	1	c	60	28	Undergraduate University Degree	United States	North Western European, British or Irish	Female	0- Exclusively heterosexual with no homosexual	32
587	Condition 1	1c	1	c	60	28	Post Graduate University Degree	Australia	North Western European, British or Irish	Female	0- Exclusively heterosexual with no homosexual	32
1509	Condition 1	1c	1	c	80	28	Other/Currently enrolled in college	United States	None of these define my ethnic group	Female	0- Exclusively heterosexual with no homosexual	32
1342	Condition 1	1c	1	c	95	28	Post Graduate University Degree	United States	European Mixed Race	Female	0- Exclusively heterosexual with no homosexual	32
1543	Condition 1	1c	1	c	40	27	Doctorate/PhD	Germany	South American	Female	0- Exclusively heterosexual with no homosexual	32
1872	Condition 1	1c	1	c	60	27	Post Graduate University Degree	Germany	European Mixed Race	Female	0- Exclusively heterosexual with no homosexual	32
1170	Condition 1	1c	1	c	60	26	Undergraduate University Degree	Italy	Southern European	Female	0- Exclusively heterosexual with no homosexual	32
137	Condition 1	1c	1	c	75	26	Diploma	Australia	Mixed Race Australian	Female	0- Exclusively heterosexual with no homosexual	32
1159	Condition 1	1c	1	c	60	25	Undergraduate University Degree	United States	South American	Female	0- Exclusively heterosexual with no homosexual	32
890	Condition 1	1c	1	c	55	24	Post Graduate University Degree	Spain	Southern European	Female	0- Exclusively heterosexual with no homosexual	32
1854	Condition 1	1c	1	c	70	24	High School	United Kingdom	North Western European, British or Irish	Female	0- Exclusively heterosexual with no homosexual	32
1339	Condition 1	1c	1	c	75	24	Post Graduate University Degree	Japan	North Western European, British or Irish	Female	0- Exclusively heterosexual with no homosexual	32
1389	Condition 1	1c	1	c	40	23	Post Graduate University Degree	Germany	Southern European	Female	0- Exclusively heterosexual with no homosexual	32
1332	Condition 1	1c	1	c	50	23	Undergraduate University Degree	Germany	European Mixed Race	Female	0- Exclusively heterosexual with no homosexual	32
515	Condition 1	1c	1	c	60	23	Undergraduate University Degree	Australia	North Western European, British or Irish	Female	0- Exclusively heterosexual with no homosexual	32
1312	Condition 1	1c	1	c	60	23	Undergraduate University Degree	Mexico	European Mixed Race	Female	0- Exclusively heterosexual with no homosexual	32
1618	Condition 1	1c	1	c	60	23	Undergraduate University Degree	Greece	South Eastern and Eastern European	Female	0- Exclusively heterosexual with no homosexual	32
1891	Condition 1	1c	1	c	70	23	Undergraduate University Degree	Canada	North Western European, British or Irish	Female	0- Exclusively heterosexual with no homosexual	32
1169	Condition 1	1c	1	c	85	23	Undergraduate University Degree	Germany	North Western European, British or Irish	Female	0- Exclusively heterosexual with no homosexual	32
480	Condition 1	1c	1	c	35	22	Undergraduate University Degree	India	South East Asian	Female	0- Exclusively heterosexual with no homosexual	32
1334	Condition 1	1c	1	c	50	22	Undergraduate University Degree	Hungary	South Eastern and Eastern European	Female	0- Exclusively heterosexual with no homosexual	32
860	Condition 1	1c	1	c	65	22	High School	Sweden	European Mixed Race	Female	0- Exclusively heterosexual with no homosexual	32
1280	Condition 1	1c	1	c	90	21	Undergraduate University Degree	United States	European Mixed Race	Female	0- Exclusively heterosexual with no homosexual	32
1606	Condition 1	1c	1	c	65	20	High School	United States	European Mixed Race	Female	0- Exclusively heterosexual with no homosexual	32
1320	Condition 1	1c	1	c	80	20	High School	United States	North Western European, British or Irish	Female	0- Exclusively heterosexual with no homosexual	32
908	Condition 1	1c	1	c	35	19	Undergraduate University Degree	United Kingdom	European Mixed Race	Female	0- Exclusively heterosexual with no homosexual	32
203	Condition 1	1c	1	c	50	19	High School	Australia	European Mixed Race	Female	0- Exclusively heterosexual with no homosexual	32
293	Condition 1	1c	1	c	50	19	Undergraduate University Degree	Australia	Chinese Asian	Female	0- Exclusively heterosexual with no homosexual	32
1910	Condition 1	1c	1	c	50	19	Diploma	Netherlands	South Eastern and Eastern European	Female	0- Exclusively heterosexual with no homosexual	32
1027	Condition 1	1c	1	c	65	19	Undergraduate University Degree	South Africa	North Western European, British or Irish	Female	0- Exclusively heterosexual with no homosexual	32
630	Condition 1	1c	1	c	70	19	Undergraduate University Degree	United Kingdom	North Western European, British or Irish	Female	0- Exclusively heterosexual with no homosexual	32
889	Condition 1	1c	1	c	40	18	High School	Australia	Chinese Asian	Female	0- Exclusively heterosexual with no homosexual	32
1248	Condition 1	1c	1	c	45	18	Undergraduate University Degree	United States	Native American Mixed Race	Female	0- Exclusively heterosexual with no homosexual	32
80	Condition 1	1c	1	c	60	18	Undergraduate University Degree	Australia	None of these define my ethnic group	Female	0- Exclusively heterosexual with no homosexual	32
2005	Condition 1	1c	1	c	65	18	High School	Australia	Chinese Asian	Female	0- Exclusively heterosexual with no homosexual	32
649	Condition 1	1c	1	c	80	18	High School	Australia	North Western European, British or Irish	Female	0- Exclusively heterosexual with no homosexual	32
1292	Condition 1	1c	1	c	80	18	High School	Portugal	Southern European	Female	0- Exclusively heterosexual with no homosexual	32
1302	Condition 1	1c	1	c	80	18	High School	Australia	European Mixed Race	Female	0- Exclusively heterosexual with no homosexual	32
1958	Condition 1	1c	1	c	75	19	High School	United Kingdom	North Western European, British or Irish	Female	0- Exclusively heterosexual with no homosexual, 1- Predominantly heterosexual, only incidentally homosexual	32
1747	Condition 1	1c	1	c	80	38	Undergraduate University Degree	United States	South Eastern and Eastern European	Female	1- Predominantly heterosexual, only incidentally homosexual	32
378	Condition 1	1c	1	c	70	36	Post Graduate University Degree	United States	North Western European, British or Irish	Female	1- Predominantly heterosexual, only incidentally homosexual	32
379	Condition 1	1c	1	c	50	33	High School	Argentina	South American	Female	1- Predominantly heterosexual, only incidentally homosexual	32
1990	Condition 1	1c	1	c	55	33	Other/Associates Degree in Nursing	United States	European Mixed Race	Female	1- Predominantly heterosexual, only incidentally homosexual	32
895	Condition 1	1c	1	c	55	32	Undergraduate University Degree	Spain	Southern European	Female	1- Predominantly heterosexual, only incidentally homosexual	32
1127	Condition 1	1c	1	c	65	32	Undergraduate University Degree	United States	None of these define my ethnic group	Female	1- Predominantly heterosexual, only incidentally homosexual	32
728	Condition 1	1c	1	c	70	32	Doctorate/PhD	Germany	North Western European, British or Irish	Female	1- Predominantly heterosexual, only incidentally homosexual	32
1177	Condition 1	1c	1	c	60	31	Post Graduate University Degree	United States	European Mixed Race	Female	1- Predominantly heterosexual, only incidentally homosexual	32
622	Condition 1	1c	1	c	90	31	Post Graduate University Degree	Other - East European	North Western European, British or Irish	Female	1- Predominantly heterosexual, only incidentally homosexual	32
506	Condition 1	1c	1	c	40	30	Undergraduate University Degree	Mexico	Central American	Female	1- Predominantly heterosexual, only incidentally homosexual	32
126	Condition 1	1c	1	c	60	30	Undergraduate University Degree	Australia	European Mixed Race	Female	1- Predominantly heterosexual, only incidentally homosexual	32
736	Condition 1	1c	1	c	85	30	Undergraduate University Degree	United States	North Western European, British or Irish	Female	1- Predominantly heterosexual, only incidentally homosexual	32
905	Condition 1	1c	1	c	90	30	Post Graduate University Degree	United States	European Mixed Race	Female	1- Predominantly heterosexual, only incidentally homosexual	32
72	Condition 1	1c	1	c	55	29	Post Graduate University Degree	Australia	Mixed Race Australian	Female	1- Predominantly heterosexual, only incidentally homosexual	32
1581	Condition 1	1c	1	c	60	29	Undergraduate University Degree	Ireland	European Mixed Race	Female	1- Predominantly heterosexual, only incidentally homosexual	32
931	Condition 1	1c	1	c	75	29	Post Graduate University Degree	Australia	North Western European, British or Irish	Female	1- Predominantly heterosexual, only incidentally homosexual	32
1271	Condition 1	1c	1	c	60	28	Undergraduate University Degree	United States	None of these define my ethnic group	Female	1- Predominantly heterosexual, only incidentally homosexual	32
1721	Condition 1	1c	1	c	80	27	Doctorate/PhD	United States	South Eastern and Eastern European	Female	1- Predominantly heterosexual, only incidentally homosexual	32
956	Condition 1	1c	1	c	85	27	Post Graduate University Degree	Netherlands	North Western European, British or Irish	Female	1- Predominantly heterosexual, only incidentally homosexual	32
1355	Condition 1	1c	1	c	85	27	Undergraduate University Degree	United States	None of these define my ethnic group	Female	1- Predominantly heterosexual, only incidentally homosexual	32
1373	Condition 1	1c	1	c	40	26	High School	United States	North Western European, British or Irish	Female	1- Predominantly heterosexual, only incidentally homosexual	32
1261	Condition 1	1c	1	c	55	25	Undergraduate University Degree	United States	North Western European, British or Irish	Female	1- Predominantly heterosexual, only incidentally homosexual	32
986	Condition 1	1c	1	c	60	25	Undergraduate University Degree	United States	North African or Middle Eastern Arab	Female	1- Predominantly heterosexual, only incidentally homosexual	32
2007	Condition 1	1c	1	c	60	25	Undergraduate University Degree	Canada	North Western European, British or Irish	Female	1- Predominantly heterosexual, only incidentally homosexual	32
620	Condition 1	1c	1	c	45	24	Post Graduate University Degree	United States	European Mixed Race	Female	1- Predominantly heterosexual, only incidentally homosexual	32
296	Condition 1	1c	1	c	70	24	Post Graduate University Degree	Australia	Mixed Race Australian	Female	1- Predominantly heterosexual, only incidentally homosexual	32
311	Condition 1	1c	1	c	85	24	Undergraduate University Degree	Australia	North Western European, British or Irish	Female	1- Predominantly heterosexual, only incidentally homosexual	32
768	Condition 1	1c	1	c	60	23	Diploma	United States	Native American Mixed Race	Female	1- Predominantly heterosexual, only incidentally homosexual	32
1677	Condition 1	1c	1	c	65	23	Other/In college	United States	Other Central or South American or Mixed Race	Female	1- Predominantly heterosexual, only incidentally homosexual	32
276	Condition 1	1c	1	c	55	22	Undergraduate University Degree	Australia	Chinese Asian	Female	1- Predominantly heterosexual, only incidentally homosexual	32
1411	Condition 1	1c	1	c	70	22	Undergraduate University Degree	United States	North Western European, British or Irish	Female	1- Predominantly heterosexual, only incidentally homosexual	32
17	Condition 1	1c	1	c	75	22	Post Graduate University Degree	South Africa	North Western European, British or Irish	Female	1- Predominantly heterosexual, only incidentally homosexual	32
86	Condition 1	1c	1	c	25	21	Undergraduate University Degree	Australia	North Western European, British or Irish	Female	1- Predominantly heterosexual, only incidentally homosexual	32
211	Condition 1	1c	1	c	50	21	Undergraduate University Degree	Australia	Chinese Asian	Female	1- Predominantly heterosexual, only incidentally homosexual	32
1044	Condition 1	1c	1	c	65	21	Undergraduate University Degree	Australia	Mixed Race Australian	Female	1- Predominantly heterosexual, only incidentally homosexual	32
1734	Condition 1	1c	1	c	70	21	Undergraduate University Degree	Germany	North Western European, British or Irish	Female	1- Predominantly heterosexual, only incidentally homosexual	32
224	Condition 1	1c	1	c	75	21	Undergraduate University Degree	Australia	North Western European, British or Irish	Female	1- Predominantly heterosexual, only incidentally homosexual	32
1639	Condition 1	1c	1	c	50	20	Undergraduate University Degree	United States	European Mixed Race	Female	1- Predominantly heterosexual, only incidentally homosexual	32
722	Condition 1	1c	1	c	60	20	High School	Czech Republic	South Eastern and Eastern European	Female	1- Predominantly heterosexual, only incidentally homosexual	32
792	Condition 1	1c	1	c	60	20	High School	United States	North Western European, British or Irish	Female	1- Predominantly heterosexual, only incidentally homosexual	32
448	Condition 1	1c	1	c	55	19	Undergraduate University Degree	United States	Native North American or First Nation	Female	1- Predominantly heterosexual, only incidentally homosexual	32
1701	Condition 1	1c	1	c	60	19	Undergraduate University Degree	United Kingdom	North Western European, British or Irish	Female	1- Predominantly heterosexual, only incidentally homosexual	32
1764	Condition 1	1c	1	c	45	18	High School	Other - East European	South Eastern and Eastern European	Female	1- Predominantly heterosexual, only incidentally homosexual	32
1802	Condition 1	1c	1	c	65	18	High School	Canada	North Western European, British or Irish	Female	1- Predominantly heterosexual, only incidentally homosexual	32
738	Condition 1	1c	1	c	70	18	High School	United Kingdom	North Western European, British or Irish	Female	1- Predominantly heterosexual, only incidentally homosexual	32
477	Condition 1	1c	1	c	50	38	Undergraduate University Degree	United States	North Western European, British or Irish	Female	2- Predominantly heterosexual, but more than incidentally homosexual	32
880	Condition 1	1c	1	c	85	38	Post Graduate University Degree	United States	North Western European, British or Irish	Female	2- Predominantly heterosexual, but more than incidentally homosexual	32
1223	Condition 1	1c	1	c	90	38	Undergraduate University Degree	United States	European Mixed Race	Female	2- Predominantly heterosexual, but more than incidentally homosexual	32
470	Condition 1	1c	1	c	70	36	Doctorate/PhD	United States	South East Asian	Female	2- Predominantly heterosexual, but more than incidentally homosexual	32
1096	Condition 1	1c	1	c	45	31	Post Graduate University Degree	Portugal	Southern European	Female	2- Predominantly heterosexual, but more than incidentally homosexual	32
1348	Condition 1	1c	1	c	70	30	Undergraduate University Degree	United States	North Western European, British or Irish	Female	2- Predominantly heterosexual, but more than incidentally homosexual	32
1310	Condition 1	1c	1	c	70	29	Undergraduate University Degree	United States	None of these define my ethnic group	Female	2- Predominantly heterosexual, but more than incidentally homosexual	32
1589	Condition 1	1c	1	c	70	26	Other/Some college	United States	None of these define my ethnic group	Female	2- Predominantly heterosexual, but more than incidentally homosexual	32
1879	Condition 1	1c	1	c	70	26	Undergraduate University Degree	United States	North Western European, British or Irish	Female	2- Predominantly heterosexual, but more than incidentally homosexual	32
1247	Condition 1	1c	1	c	55	23	High School	Sweden	North Western European, British or Irish	Female	2- Predominantly heterosexual, but more than incidentally homosexual	32
1377	Condition 1	1c	1	c	90	23	Post Graduate University Degree	United States	European Mixed Race	Female	2- Predominantly heterosexual, but more than incidentally homosexual	32
833	Condition 1	1c	1	c	70	22	Undergraduate University Degree	United Kingdom	North Western European, British or Irish	Female	2- Predominantly heterosexual, but more than incidentally homosexual	32
1662	Condition 1	1c	1	c	75	21	Undergraduate University Degree	United States	European Mixed Race	Female	2- Predominantly heterosexual, but more than incidentally homosexual	32
404	Condition 1	1c	1	c	70	20	High School	United States	None of these define my ethnic group	Female	2- Predominantly heterosexual, but more than incidentally homosexual	32
466	Condition 1	1c	1	c	50	19	High School	Australia	North Western European, British or Irish	Female	2- Predominantly heterosexual, but more than incidentally homosexual	32
489	Condition 1	1c	1	c	70	19	Undergraduate University Degree	Australia	South Eastern and Eastern European	Female	2- Predominantly heterosexual, but more than incidentally homosexual	32
1300	Condition 1	1c	1	c	80	19	Diploma	Switzerland	Other Asian or Mixed Race Asian	Female	2- Predominantly heterosexual, but more than incidentally homosexual	32
1102	Condition 1	1c	1	c	65	37	Doctorate/PhD	United States	South Eastern and Eastern European	Female	3- Equally heterosexual and homosexual	32
1206	Condition 1	1c	1	c	75	35	Post Graduate University Degree	United States	None of these define my ethnic group	Female	3- Equally heterosexual and homosexual	32
418	Condition 1	1c	1	c	75	32	Undergraduate University Degree	United States	European Mixed Race	Female	3- Equally heterosexual and homosexual	32
1264	Condition 1	1c	1	c	80	30	Other/Two Associate's Degrees, 6 credits away from a Bachelor's Degree	United States	European Mixed Race	Female	3- Equally heterosexual and homosexual	32
583	Condition 1	1c	1	c	65	26	Post Graduate University Degree	United Kingdom	European Mixed Race	Female	3- Equally heterosexual and homosexual	32
372	Condition 1	1c	1	c	45	25	Post Graduate University Degree	Australia	North Western European, British or Irish	Female	3- Equally heterosexual and homosexual	32
1240	Condition 1	1c	1	c	75	24	Diploma	Canada	North Western European, British or Irish	Female	3- Equally heterosexual and homosexual	32
977	Condition 1	1c	1	c	60	23	High School	United States	North Western European, British or Irish	Female	3- Equally heterosexual and homosexual	32
542	Condition 1	1c	1	c	70	23	Other/High school plus coaching certifications	Canada	North Western European, British or Irish	Female	3- Equally heterosexual and homosexual	32
43	Condition 1	1c	1	c	50	22	Undergraduate University Degree	Australia	South East Asian	Female	3- Equally heterosexual and homosexual	32
1315	Condition 1	1c	1	c	30	19	Undergraduate University Degree	France	European Mixed Race	Female	3- Equally heterosexual and homosexual	32
1053	Condition 1	2a	2	a	65	51	Undergraduate University Degree	United States	South Eastern and Eastern European	Female	0- Exclusively heterosexual with no homosexual	24
1399	Condition 1	2a	2	a	5	45	Undergraduate University Degree	United States	North Western European, British or Irish	Female	0- Exclusively heterosexual with no homosexual	24
830	Condition 1	2a	2	a	60	40	Doctorate/PhD	United States	North Western European, British or Irish	Female	0- Exclusively heterosexual with no homosexual	24
513	Condition 1	2a	2	a	65	40	High School	Australia	North Western European, British or Irish	Female	0- Exclusively heterosexual with no homosexual	24
673	Condition 1	2a	2	a	45	38	Post Graduate University Degree	Sweden	North Western European, British or Irish	Female	0- Exclusively heterosexual with no homosexual	24
1605	Condition 1	2a	2	a	80	38	Doctorate/PhD	United States	European Mixed Race	Female	0- Exclusively heterosexual with no homosexual	24
28	Condition 1	2a	2	a	70	37	Post Graduate University Degree	Australia	North Western European, British or Irish	Female	0- Exclusively heterosexual with no homosexual	24
960	Condition 1	2a	2	a	70	35	Undergraduate University Degree	United States	North Western European, British or Irish	Female	0- Exclusively heterosexual with no homosexual	24
1723	Condition 1	2a	2	a	60	34	Undergraduate University Degree	New Zealand	North Western European, British or Irish	Female	0- Exclusively heterosexual with no homosexual	24
1017	Condition 1	2a	2	a	75	34	Undergraduate University Degree	Canada	North Western European, British or Irish	Female	0- Exclusively heterosexual with no homosexual	24
1484	Condition 1	2a	2	a	25	33	Other/some college	United States	None of these define my ethnic group	Female	0- Exclusively heterosexual with no homosexual	24
1417	Condition 1	2a	2	a	40	33	Post Graduate University Degree	Other - Southern America	None of these define my ethnic group	Female	0- Exclusively heterosexual with no homosexual	24
1669	Condition 1	2a	2	a	60	33	Undergraduate University Degree	Egypt	North African or Middle Eastern Arab	Female	0- Exclusively heterosexual with no homosexual	24
1368	Condition 1	2a	2	a	50	32	Undergraduate University Degree	United States	Central American	Female	0- Exclusively heterosexual with no homosexual	24
494	Condition 1	2a	2	a	80	32	Post Graduate University Degree	Isreal	None of these define my ethnic group	Female	0- Exclusively heterosexual with no homosexual	24
1349	Condition 1	2a	2	a	45	31	Undergraduate University Degree	Germany	North Western European, British or Irish	Female	0- Exclusively heterosexual with no homosexual	24
1984	Condition 1	2a	2	a	30	30	Undergraduate University Degree	Other - Southern America	Central American	Female	0- Exclusively heterosexual with no homosexual	24
913	Condition 1	2a	2	a	30	29	Undergraduate University Degree	Portugal	Southern European	Female	0- Exclusively heterosexual with no homosexual	24
1719	Condition 1	2a	2	a	50	29	Undergraduate University Degree	United States	Native American Mixed Race	Female	0- Exclusively heterosexual with no homosexual	24
708	Condition 1	2a	2	a	70	29	Undergraduate University Degree	United States	European Mixed Race	Female	0- Exclusively heterosexual with no homosexual	24
314	Condition 1	2a	2	a	65	28	Undergraduate University Degree	Australia	Chinese Asian	Female	0- Exclusively heterosexual with no homosexual	24
632	Condition 1	2a	2	a	25	27	Post Graduate University Degree	France	North Western European, British or Irish	Female	0- Exclusively heterosexual with no homosexual	24
1872	Condition 1	2a	2	a	55	27	Post Graduate University Degree	Germany	European Mixed Race	Female	0- Exclusively heterosexual with no homosexual	24
1365	Condition 1	2a	2	a	20	26	Doctorate/PhD	United States	European Mixed Race	Female	0- Exclusively heterosexual with no homosexual	24
900	Condition 1	2a	2	a	15	25	Diploma	United Kingdom	None of these define my ethnic group	Female	0- Exclusively heterosexual with no homosexual	24
1159	Condition 1	2a	2	a	45	25	Undergraduate University Degree	United States	South American	Female	0- Exclusively heterosexual with no homosexual	24
600	Condition 1	2a	2	a	60	24	Post Graduate University Degree	Other - Asia	None of these define my ethnic group	Female	0- Exclusively heterosexual with no homosexual	24
725	Condition 1	2a	2	a	65	24	Undergraduate University Degree	United States	Chinese Asian	Female	0- Exclusively heterosexual with no homosexual	24
925	Condition 1	2a	2	a	50	23	Undergraduate University Degree	Portugal	Southern European	Female	0- Exclusively heterosexual with no homosexual	24
1618	Condition 1	2a	2	a	50	23	Undergraduate University Degree	Greece	South Eastern and Eastern European	Female	0- Exclusively heterosexual with no homosexual	24
515	Condition 1	2a	2	a	55	23	Undergraduate University Degree	Australia	North Western European, British or Irish	Female	0- Exclusively heterosexual with no homosexual	24
391	Condition 1	2a	2	a	65	23	Undergraduate University Degree	Canada	North Western European, British or Irish	Female	0- Exclusively heterosexual with no homosexual	24
1891	Condition 1	2a	2	a	65	23	Undergraduate University Degree	Canada	North Western European, British or Irish	Female	0- Exclusively heterosexual with no homosexual	24
959	Condition 1	2a	2	a	40	22	Undergraduate University Degree	Germany	North Western European, British or Irish	Female	0- Exclusively heterosexual with no homosexual	24
878	Condition 1	2a	2	a	70	22	High School	Australia	Mixed Race Australian	Female	0- Exclusively heterosexual with no homosexual	24
1903	Condition 1	2a	2	a	40	21	Diploma	United States	North Western European, British or Irish	Female	0- Exclusively heterosexual with no homosexual	24
1647	Condition 1	2a	2	a	45	21	Undergraduate University Degree	United Kingdom	North Western European, British or Irish	Female	0- Exclusively heterosexual with no homosexual	24
1791	Condition 1	2a	2	a	85	21	Undergraduate University Degree	United States	North Western European, British or Irish	Female	0- Exclusively heterosexual with no homosexual	24
304	Condition 1	2a	2	a	35	20	Undergraduate University Degree	Malaysia	Chinese Asian	Female	0- Exclusively heterosexual with no homosexual	24
1491	Condition 1	2a	2	a	35	20	Undergraduate University Degree	Brazil	South American	Female	0- Exclusively heterosexual with no homosexual	24
1606	Condition 1	2a	2	a	40	20	High School	United States	European Mixed Race	Female	0- Exclusively heterosexual with no homosexual	24
185	Condition 1	2a	2	a	50	20	Undergraduate University Degree	Australia	South East Asian	Female	0- Exclusively heterosexual with no homosexual	24
1320	Condition 1	2a	2	a	50	20	High School	United States	North Western European, British or Irish	Female	0- Exclusively heterosexual with no homosexual	24
1910	Condition 1	2a	2	a	30	19	Diploma	Netherlands	South Eastern and Eastern European	Female	0- Exclusively heterosexual with no homosexual	24
155	Condition 1	2a	2	a	35	19	High School	Australia	North Western European, British or Irish	Female	0- Exclusively heterosexual with no homosexual	24
363	Condition 1	2a	2	a	35	19	High School	Australia	Other North-East Asian	Female	0- Exclusively heterosexual with no homosexual	24
1146	Condition 1	2a	2	a	60	19	Undergraduate University Degree	Australia	North Western European, British or Irish	Female	0- Exclusively heterosexual with no homosexual	24
151	Condition 1	2a	2	a	40	18	Undergraduate University Degree	Australia	Southern Asian	Female	0- Exclusively heterosexual with no homosexual	24
1248	Condition 1	2a	2	a	45	18	Undergraduate University Degree	United States	Native American Mixed Race	Female	0- Exclusively heterosexual with no homosexual	24
649	Condition 1	2a	2	a	65	18	High School	Australia	North Western European, British or Irish	Female	0- Exclusively heterosexual with no homosexual	24
2005	Condition 1	2a	2	a	70	18	High School	Australia	Chinese Asian	Female	0- Exclusively heterosexual with no homosexual	24
1570	Condition 1	2a	2	a	50	22	High School	Mexico	Other Asian or Mixed Race Asian	Female	0- Exclusively heterosexual with no homosexual, 1- Predominantly heterosexual, only incidentally homosexual	24
1141	Condition 1	2a	2	a	55	47	Undergraduate University Degree	United States	North Western European, British or Irish	Female	1- Predominantly heterosexual, only incidentally homosexual	24
1142	Condition 1	2a	2	a	50	41	Undergraduate University Degree	United States	None of these define my ethnic group	Female	1- Predominantly heterosexual, only incidentally homosexual	24
1441	Condition 1	2a	2	a	55	36	Undergraduate University Degree	Canada	Caribbean Islander	Female	1- Predominantly heterosexual, only incidentally homosexual	24
1990	Condition 1	2a	2	a	35	33	Other/Associates Degree in Nursing	United States	European Mixed Race	Female	1- Predominantly heterosexual, only incidentally homosexual	24
1127	Condition 1	2a	2	a	35	32	Undergraduate University Degree	United States	None of these define my ethnic group	Female	1- Predominantly heterosexual, only incidentally homosexual	24
1186	Condition 1	2a	2	a	30	31	Undergraduate University Degree	United States	European Mixed Race	Female	1- Predominantly heterosexual, only incidentally homosexual	24
949	Condition 1	2a	2	a	75	31	Undergraduate University Degree	United States	None of these define my ethnic group	Female	1- Predominantly heterosexual, only incidentally homosexual	24
905	Condition 1	2a	2	a	15	30	Post Graduate University Degree	United States	European Mixed Race	Female	1- Predominantly heterosexual, only incidentally homosexual	24
126	Condition 1	2a	2	a	55	30	Undergraduate University Degree	Australia	European Mixed Race	Female	1- Predominantly heterosexual, only incidentally homosexual	24
736	Condition 1	2a	2	a	60	30	Undergraduate University Degree	United States	North Western European, British or Irish	Female	1- Predominantly heterosexual, only incidentally homosexual	24
302	Condition 1	2a	2	a	50	29	Undergraduate University Degree	Australia	Mixed Race Australian	Female	1- Predominantly heterosexual, only incidentally homosexual	24
1158	Condition 1	2a	2	a	50	29	Post Graduate University Degree	United States	None of these define my ethnic group	Female	1- Predominantly heterosexual, only incidentally homosexual	24
612	Condition 1	2a	2	a	60	29	Diploma	Germany	South Eastern and Eastern European	Female	1- Predominantly heterosexual, only incidentally homosexual	24
1581	Condition 1	2a	2	a	60	29	Undergraduate University Degree	Ireland	European Mixed Race	Female	1- Predominantly heterosexual, only incidentally homosexual	24
1648	Condition 1	2a	2	a	45	27	Undergraduate University Degree	United States	North Western European, British or Irish	Female	1- Predominantly heterosexual, only incidentally homosexual	24
1355	Condition 1	2a	2	a	50	27	Undergraduate University Degree	United States	None of these define my ethnic group	Female	1- Predominantly heterosexual, only incidentally homosexual	24
1649	Condition 1	2a	2	a	25	26	Undergraduate University Degree	Australia	New Zealand Peoples	Female	1- Predominantly heterosexual, only incidentally homosexual	24
324	Condition 1	2a	2	a	40	26	Undergraduate University Degree	United Kingdom	North Western European, British or Irish	Female	1- Predominantly heterosexual, only incidentally homosexual	24
785	Condition 1	2a	2	a	45	25	Undergraduate University Degree	Norway	North Western European, British or Irish	Female	1- Predominantly heterosexual, only incidentally homosexual	24
1216	Condition 1	2a	2	a	65	25	Undergraduate University Degree	United Kingdom	Southern Asian	Female	1- Predominantly heterosexual, only incidentally homosexual	24
311	Condition 1	2a	2	a	50	24	Undergraduate University Degree	Australia	North Western European, British or Irish	Female	1- Predominantly heterosexual, only incidentally homosexual	24
1020	Condition 1	2a	2	a	70	24	Post Graduate University Degree	Netherlands	European Mixed Race	Female	1- Predominantly heterosexual, only incidentally homosexual	24
768	Condition 1	2a	2	a	40	23	Diploma	United States	Native American Mixed Race	Female	1- Predominantly heterosexual, only incidentally homosexual	24
1478	Condition 1	2a	2	a	40	23	Undergraduate University Degree	United States	European Mixed Race	Female	1- Predominantly heterosexual, only incidentally homosexual	24
735	Condition 1	2a	2	a	45	23	Undergraduate University Degree	Germany	North Western European, British or Irish	Female	1- Predominantly heterosexual, only incidentally homosexual	24
1626	Condition 1	2a	2	a	45	23	Undergraduate University Degree	United Kingdom	North Western European, British or Irish	Female	1- Predominantly heterosexual, only incidentally homosexual	24
1139	Condition 1	2a	2	a	50	23	Undergraduate University Degree	United Kingdom	North Western European, British or Irish	Female	1- Predominantly heterosexual, only incidentally homosexual	24
1497	Condition 1	2a	2	a	50	23	Undergraduate University Degree	United States	European Mixed Race	Female	1- Predominantly heterosexual, only incidentally homosexual	24
1861	Condition 1	2a	2	a	55	23	Undergraduate University Degree	Spain	North Western European, British or Irish	Female	1- Predominantly heterosexual, only incidentally homosexual	24
756	Condition 1	2a	2	a	35	22	Diploma	United States	North Western European, British or Irish	Female	1- Predominantly heterosexual, only incidentally homosexual	24
732	Condition 1	2a	2	a	45	22	Undergraduate University Degree	United Kingdom	North Western European, British or Irish	Female	1- Predominantly heterosexual, only incidentally homosexual	24
17	Condition 1	2a	2	a	55	22	Post Graduate University Degree	South Africa	North Western European, British or Irish	Female	1- Predominantly heterosexual, only incidentally homosexual	24
1999	Condition 1	2a	2	a	30	21	High School	Canada	None of these define my ethnic group	Female	1- Predominantly heterosexual, only incidentally homosexual	24
239	Condition 1	2a	2	a	50	21	Undergraduate University Degree	Australia	European Mixed Race	Female	1- Predominantly heterosexual, only incidentally homosexual	24
1734	Condition 1	2a	2	a	50	21	Undergraduate University Degree	Germany	North Western European, British or Irish	Female	1- Predominantly heterosexual, only incidentally homosexual	24
228	Condition 1	2a	2	a	65	21	Undergraduate University Degree	Australia	North Western European, British or Irish	Female	1- Predominantly heterosexual, only incidentally homosexual	24
792	Condition 1	2a	2	a	20	20	High School	United States	North Western European, British or Irish	Female	1- Predominantly heterosexual, only incidentally homosexual	24
813	Condition 1	2a	2	a	30	20	Undergraduate University Degree	Ireland	North Western European, British or Irish	Female	1- Predominantly heterosexual, only incidentally homosexual	24
1639	Condition 1	2a	2	a	35	20	Undergraduate University Degree	United States	European Mixed Race	Female	1- Predominantly heterosexual, only incidentally homosexual	24
452	Condition 1	2a	2	a	45	20	High School	Other - East European	South Eastern and Eastern European	Female	1- Predominantly heterosexual, only incidentally homosexual	24
1055	Condition 1	2a	2	a	60	20	High School	Ireland	North Western European, British or Irish	Female	1- Predominantly heterosexual, only incidentally homosexual	24
1311	Condition 1	2a	2	a	60	20	Undergraduate University Degree	United States	None of these define my ethnic group	Female	1- Predominantly heterosexual, only incidentally homosexual	24
722	Condition 1	2a	2	a	65	20	High School	Czech Republic	South Eastern and Eastern European	Female	1- Predominantly heterosexual, only incidentally homosexual	24
576	Condition 1	2a	2	a	40	19	High School	United Kingdom	Chinese Asian	Female	1- Predominantly heterosexual, only incidentally homosexual	24
749	Condition 1	2a	2	a	55	19	High School	United Kingdom	North Western European, British or Irish	Female	1- Predominantly heterosexual, only incidentally homosexual	24
1702	Condition 1	2a	2	a	60	19	High School	Portugal	Southern European	Female	1- Predominantly heterosexual, only incidentally homosexual	24
353	Condition 1	2a	2	a	30	18	High School	Other - Southern Europe	South Eastern and Eastern European	Female	1- Predominantly heterosexual, only incidentally homosexual	24
429	Condition 1	2a	2	a	50	18	High School	Mexico	Central American	Female	1- Predominantly heterosexual, only incidentally homosexual	24
1562	Condition 1	2a	2	a	60	18	High School	Germany	Southern European	Female	1- Predominantly heterosexual, only incidentally homosexual	24
1802	Condition 1	2a	2	a	60	18	High School	Canada	North Western European, British or Irish	Female	1- Predominantly heterosexual, only incidentally homosexual	24
470	Condition 1	2a	2	a	55	36	Doctorate/PhD	United States	South East Asian	Female	2- Predominantly heterosexual, but more than incidentally homosexual	24
1098	Condition 1	2a	2	a	40	34	Undergraduate University Degree	United States	European Mixed Race	Female	2- Predominantly heterosexual, but more than incidentally homosexual	24
1096	Condition 1	2a	2	a	50	31	Post Graduate University Degree	Portugal	Southern European	Female	2- Predominantly heterosexual, but more than incidentally homosexual	24
1946	Condition 1	2a	2	a	50	30	Undergraduate University Degree	United States	European Mixed Race	Female	2- Predominantly heterosexual, but more than incidentally homosexual	24
407	Condition 1	2a	2	a	45	26	Undergraduate University Degree	Finland	North Western European, British or Irish	Female	2- Predominantly heterosexual, but more than incidentally homosexual	24
1865	Condition 1	2a	2	a	50	26	Post Graduate University Degree	United Kingdom	South East Asian	Female	2- Predominantly heterosexual, but more than incidentally homosexual	24
1879	Condition 1	2a	2	a	55	26	Undergraduate University Degree	United States	North Western European, British or Irish	Female	2- Predominantly heterosexual, but more than incidentally homosexual	24
235	Condition 1	2a	2	a	50	24	Undergraduate University Degree	Australia	Chinese Asian	Female	2- Predominantly heterosexual, but more than incidentally homosexual	24
147	Condition 1	2a	2	a	60	24	Undergraduate University Degree	Australia	North Western European, British or Irish	Female	2- Predominantly heterosexual, but more than incidentally homosexual	24
221	Condition 1	2a	2	a	60	24	Undergraduate University Degree	Australia	Mixed Race Australian	Female	2- Predominantly heterosexual, but more than incidentally homosexual	24
1247	Condition 1	2a	2	a	35	23	High School	Sweden	North Western European, British or Irish	Female	2- Predominantly heterosexual, but more than incidentally homosexual	24
1024	Condition 1	2a	2	a	60	23	Undergraduate University Degree	United States	North Western European, British or Irish	Female	2- Predominantly heterosexual, but more than incidentally homosexual	24
833	Condition 1	2a	2	a	35	22	Undergraduate University Degree	United Kingdom	North Western European, British or Irish	Female	2- Predominantly heterosexual, but more than incidentally homosexual	24
1646	Condition 1	2a	2	a	50	22	Diploma	United States	Southern Asian	Female	2- Predominantly heterosexual, but more than incidentally homosexual	24
1277	Condition 1	2a	2	a	30	21	High School	United States	North Western European, British or Irish	Female	2- Predominantly heterosexual, but more than incidentally homosexual	24
511	Condition 1	2a	2	a	65	20	Undergraduate University Degree	United States	North Western European, British or Irish	Female	2- Predominantly heterosexual, but more than incidentally homosexual	24
996	Condition 1	2a	2	a	45	18	High School	Croatia	None of these define my ethnic group	Female	2- Predominantly heterosexual, but more than incidentally homosexual	24
372	Condition 1	2a	2	a	80	25	Post Graduate University Degree	Australia	North Western European, British or Irish	Female	3- Equally heterosexual and homosexual	24
977	Condition 1	2a	2	a	35	23	High School	United States	North Western European, British or Irish	Female	3- Equally heterosexual and homosexual	24
605	Condition 1	2a	2	a	55	20	Diploma	United States	European Mixed Race	Female	3- Equally heterosexual and homosexual	24
1262	Condition 1	2a	2	a	60	20	Undergraduate University Degree	Netherlands	None of these define my ethnic group	Female	3- Equally heterosexual and homosexual	24
1502	Condition 1	2b	2	b	55	49	Undergraduate University Degree	Austria	North Western European, British or Irish	Female	0- Exclusively heterosexual with no homosexual	24
267	Condition 1	2b	2	b	70	47	Post Graduate University Degree	Australia	North Western European, British or Irish	Female	0- Exclusively heterosexual with no homosexual	24
122	Condition 1	2b	2	b	35	46	Undergraduate University Degree	Australia	None of these define my ethnic group	Female	0- Exclusively heterosexual with no homosexual	24
579	Condition 1	2b	2	b	40	45	Undergraduate University Degree	United States	North Western European, British or Irish	Female	0- Exclusively heterosexual with no homosexual	24
268	Condition 1	2b	2	b	55	45	Undergraduate University Degree	Australia	North Western European, British or Irish	Female	0- Exclusively heterosexual with no homosexual	24
1245	Condition 1	2b	2	b	60	45	Post Graduate University Degree	United Arab Emirates	Other Central or South American or Mixed Race	Female	0- Exclusively heterosexual with no homosexual	24
1929	Condition 1	2b	2	b	55	44	Undergraduate University Degree	United States	European Mixed Race	Female	0- Exclusively heterosexual with no homosexual	24
309	Condition 1	2b	2	b	35	40	Undergraduate University Degree	Australia	North Western European, British or Irish	Female	0- Exclusively heterosexual with no homosexual	24
1201	Condition 1	2b	2	b	50	40	Undergraduate University Degree	Canada	North Western European, British or Irish	Female	0- Exclusively heterosexual with no homosexual	24
332	Condition 1	2b	2	b	55	37	High School	Australia	North Western European, British or Irish	Female	0- Exclusively heterosexual with no homosexual	24
1897	Condition 1	2b	2	b	65	36	Post Graduate University Degree	United States	European Mixed Race	Female	0- Exclusively heterosexual with no homosexual	24
1985	Condition 1	2b	2	b	50	35	Undergraduate University Degree	Brazil	Southern European	Female	0- Exclusively heterosexual with no homosexual	24
1432	Condition 1	2b	2	b	35	34	Diploma	Canada	North Western European, British or Irish	Female	0- Exclusively heterosexual with no homosexual	24
59	Condition 1	2b	2	b	40	34	Undergraduate University Degree	Australia	Mixed Race Australian	Female	0- Exclusively heterosexual with no homosexual	24
327	Condition 1	2b	2	b	45	34	High School	Belgium	North Western European, British or Irish	Female	0- Exclusively heterosexual with no homosexual	24
1887	Condition 1	2b	2	b	30	33	Doctorate/PhD	Portugal	European Mixed Race	Female	0- Exclusively heterosexual with no homosexual	24
1685	Condition 1	2b	2	b	55	31	Post Graduate University Degree	United States	European Mixed Race	Female	0- Exclusively heterosexual with no homosexual	24
923	Condition 1	2b	2	b	70	31	Undergraduate University Degree	Isreal	South American	Female	0- Exclusively heterosexual with no homosexual	24
963	Condition 1	2b	2	b	70	31	Post Graduate University Degree	United Kingdom	North Western European, British or Irish	Female	0- Exclusively heterosexual with no homosexual	24
968	Condition 1	2b	2	b	40	30	Post Graduate University Degree	Brazil	South American	Female	0- Exclusively heterosexual with no homosexual	24
1431	Condition 1	2b	2	b	50	30	Undergraduate University Degree	Other - East European	South Eastern and Eastern European	Female	0- Exclusively heterosexual with no homosexual	24
1202	Condition 1	2b	2	b	75	30	Undergraduate University Degree	United States	North Western European, British or Irish	Female	0- Exclusively heterosexual with no homosexual	24
11	Condition 1	2b	2	b	40	29	Post Graduate University Degree	United States	Native North American or First Nation	Female	0- Exclusively heterosexual with no homosexual	24
1086	Condition 1	2b	2	b	40	29	Undergraduate University Degree	United States	European Mixed Race	Female	0- Exclusively heterosexual with no homosexual	24
12	Condition 1	2b	2	b	40	28	Undergraduate University Degree	United States	North Western European, British or Irish	Female	0- Exclusively heterosexual with no homosexual	24
1509	Condition 1	2b	2	b	50	28	Other/Currently enrolled in college	United States	None of these define my ethnic group	Female	0- Exclusively heterosexual with no homosexual	24
1986	Condition 1	2b	2	b	50	28	Doctorate/PhD	United Kingdom	Southern and East Africa	Female	0- Exclusively heterosexual with no homosexual	24
587	Condition 1	2b	2	b	55	28	Post Graduate University Degree	Australia	North Western European, British or Irish	Female	0- Exclusively heterosexual with no homosexual	24
636	Condition 1	2b	2	b	60	27	Undergraduate University Degree	United States	Native American Mixed Race	Female	0- Exclusively heterosexual with no homosexual	24
827	Condition 1	2b	2	b	20	26	Diploma	United States	None of these define my ethnic group	Female	0- Exclusively heterosexual with no homosexual	24
1341	Condition 1	2b	2	b	35	26	High School	Canada	European Mixed Race	Female	0- Exclusively heterosexual with no homosexual	24
1170	Condition 1	2b	2	b	50	26	Undergraduate University Degree	Italy	Southern European	Female	0- Exclusively heterosexual with no homosexual	24
137	Condition 1	2b	2	b	65	26	Diploma	Australia	Mixed Race Australian	Female	0- Exclusively heterosexual with no homosexual	24
672	Condition 1	2b	2	b	45	25	Post Graduate University Degree	India	South East Asian	Female	0- Exclusively heterosexual with no homosexual	24
1732	Condition 1	2b	2	b	50	25	Post Graduate University Degree	Brazil	South Eastern and Eastern European	Female	0- Exclusively heterosexual with no homosexual	24
1908	Condition 1	2b	2	b	50	25	Post Graduate University Degree	United States	European Mixed Race	Female	0- Exclusively heterosexual with no homosexual	24
1995	Condition 1	2b	2	b	55	25	Undergraduate University Degree	United States	None of these define my ethnic group	Female	0- Exclusively heterosexual with no homosexual	24
476	Condition 1	2b	2	b	45	24	Undergraduate University Degree	United States	European Mixed Race	Female	0- Exclusively heterosexual with no homosexual	24
439	Condition 1	2b	2	b	50	24	Undergraduate University Degree	Taiwan	Chinese Asian	Female	0- Exclusively heterosexual with no homosexual	24
890	Condition 1	2b	2	b	55	24	Post Graduate University Degree	Spain	Southern European	Female	0- Exclusively heterosexual with no homosexual	24
560	Condition 1	2b	2	b	80	24	Undergraduate University Degree	Other - Middle East	European Mixed Race	Female	0- Exclusively heterosexual with no homosexual	24
1332	Condition 1	2b	2	b	100	23	Undergraduate University Degree	Germany	European Mixed Race	Female	0- Exclusively heterosexual with no homosexual	24
480	Condition 1	2b	2	b	10	22	Undergraduate University Degree	India	South East Asian	Female	0- Exclusively heterosexual with no homosexual	24
860	Condition 1	2b	2	b	40	22	High School	Sweden	European Mixed Race	Female	0- Exclusively heterosexual with no homosexual	24
2011	Condition 1	2b	2	b	40	22	Undergraduate University Degree	United States	North Western European, British or Irish	Female	0- Exclusively heterosexual with no homosexual	24
1334	Condition 1	2b	2	b	45	22	Undergraduate University Degree	Hungary	South Eastern and Eastern European	Female	0- Exclusively heterosexual with no homosexual	24
876	Condition 1	2b	2	b	60	22	Diploma	Italy	Southern European	Female	0- Exclusively heterosexual with no homosexual	24
1578	Condition 1	2b	2	b	70	22	Undergraduate University Degree	United States	European Mixed Race	Female	0- Exclusively heterosexual with no homosexual	24
1333	Condition 1	2b	2	b	45	21	Undergraduate University Degree	United States	European Mixed Race	Female	0- Exclusively heterosexual with no homosexual	24
370	Condition 1	2b	2	b	50	21	High School	Australia	North Western European, British or Irish	Female	0- Exclusively heterosexual with no homosexual	24
527	Condition 1	2b	2	b	50	21	Undergraduate University Degree	United States	European Mixed Race	Female	0- Exclusively heterosexual with no homosexual	24
201	Condition 1	2b	2	b	50	20	Undergraduate University Degree	Australia	North Western European, British or Irish	Female	0- Exclusively heterosexual with no homosexual	24
1397	Condition 1	2b	2	b	55	20	Undergraduate University Degree	Portugal	Southern European	Female	0- Exclusively heterosexual with no homosexual	24
1489	Condition 1	2b	2	b	65	20	Undergraduate University Degree	United States	North Western European, British or Irish	Female	0- Exclusively heterosexual with no homosexual	24
1027	Condition 1	2b	2	b	35	19	Undergraduate University Degree	South Africa	North Western European, British or Irish	Female	0- Exclusively heterosexual with no homosexual	24
396	Condition 1	2b	2	b	45	19	Diploma	United States	European Mixed Race	Female	0- Exclusively heterosexual with no homosexual	24
293	Condition 1	2b	2	b	50	19	Undergraduate University Degree	Australia	Chinese Asian	Female	0- Exclusively heterosexual with no homosexual	24
630	Condition 1	2b	2	b	55	19	Undergraduate University Degree	United Kingdom	North Western European, British or Irish	Female	0- Exclusively heterosexual with no homosexual	24
575	Condition 1	2b	2	b	25	18	Diploma	Isreal	South Eastern and Eastern European	Female	0- Exclusively heterosexual with no homosexual	24
889	Condition 1	2b	2	b	30	18	High School	Australia	Chinese Asian	Female	0- Exclusively heterosexual with no homosexual	24
1292	Condition 1	2b	2	b	35	18	High School	Portugal	Southern European	Female	0- Exclusively heterosexual with no homosexual	24
1302	Condition 1	2b	2	b	50	18	High School	Australia	European Mixed Race	Female	0- Exclusively heterosexual with no homosexual	24
1092	Condition 1	2b	2	b	55	18	Undergraduate University Degree	Portugal	Southern European	Female	0- Exclusively heterosexual with no homosexual	24
316	Condition 1	2b	2	b	60	18	Undergraduate University Degree	Australia	Southern Asian	Female	0- Exclusively heterosexual with no homosexual	24
474	Condition 1	2b	2	b	55	34	Post Graduate University Degree	Germany	North Western European, British or Irish	Female	0- Exclusively heterosexual with no homosexual, 1- Predominantly heterosexual, only incidentally homosexual	24
1512	Condition 1	2b	2	b	70	45	Undergraduate University Degree	United States	North Western European, British or Irish	Female	1- Predominantly heterosexual, only incidentally homosexual	24
261	Condition 1	2b	2	b	40	40	Post Graduate University Degree	Australia	North Western European, British or Irish	Female	1- Predominantly heterosexual, only incidentally homosexual	24
1602	Condition 1	2b	2	b	60	39	Post Graduate University Degree	United States	South Eastern and Eastern European	Female	1- Predominantly heterosexual, only incidentally homosexual	24
1971	Condition 1	2b	2	b	60	37	Post Graduate University Degree	United States	South Eastern and Eastern European	Female	1- Predominantly heterosexual, only incidentally homosexual	24
378	Condition 1	2b	2	b	50	36	Post Graduate University Degree	United States	North Western European, British or Irish	Female	1- Predominantly heterosexual, only incidentally homosexual	24
1131	Condition 1	2b	2	b	80	34	Undergraduate University Degree	United States	North Western European, British or Irish	Female	1- Predominantly heterosexual, only incidentally homosexual	24
1361	Condition 1	2b	2	b	35	33	Other/Attending college	United States	European Mixed Race	Female	1- Predominantly heterosexual, only incidentally homosexual	24
379	Condition 1	2b	2	b	40	33	High School	Argentina	South American	Female	1- Predominantly heterosexual, only incidentally homosexual	24
1617	Condition 1	2b	2	b	60	32	Diploma	Canada	North Western European, British or Irish	Female	1- Predominantly heterosexual, only incidentally homosexual	24
35	Condition 1	2b	2	b	40	31	High School	United Kingdom	South Eastern and Eastern European	Female	1- Predominantly heterosexual, only incidentally homosexual	24
1177	Condition 1	2b	2	b	55	31	Post Graduate University Degree	United States	European Mixed Race	Female	1- Predominantly heterosexual, only incidentally homosexual	24
689	Condition 1	2b	2	b	65	31	Undergraduate University Degree	Australia	North Western European, British or Irish	Female	1- Predominantly heterosexual, only incidentally homosexual	24
506	Condition 1	2b	2	b	20	30	Undergraduate University Degree	Mexico	Central American	Female	1- Predominantly heterosexual, only incidentally homosexual	24
1407	Condition 1	2b	2	b	60	30	Undergraduate University Degree	United States	European Mixed Race	Female	1- Predominantly heterosexual, only incidentally homosexual	24
1150	Condition 1	2b	2	b	65	30	Diploma	United States	North Western European, British or Irish	Female	1- Predominantly heterosexual, only incidentally homosexual	24
808	Condition 1	2b	2	b	35	29	Post Graduate University Degree	France	Southern European	Female	1- Predominantly heterosexual, only incidentally homosexual	24
1642	Condition 1	2b	2	b	20	27	High School	Austria	European Mixed Race	Female	1- Predominantly heterosexual, only incidentally homosexual	24
441	Condition 1	2b	2	b	30	27	Undergraduate University Degree	United Kingdom	North Western European, British or Irish	Female	1- Predominantly heterosexual, only incidentally homosexual	24
1624	Condition 1	2b	2	b	50	27	Post Graduate University Degree	Chile	European Mixed Race	Female	1- Predominantly heterosexual, only incidentally homosexual	24
956	Condition 1	2b	2	b	75	27	Post Graduate University Degree	Netherlands	North Western European, British or Irish	Female	1- Predominantly heterosexual, only incidentally homosexual	24
986	Condition 1	2b	2	b	30	25	Undergraduate University Degree	United States	North African or Middle Eastern Arab	Female	1- Predominantly heterosexual, only incidentally homosexual	24
393	Condition 1	2b	2	b	45	25	Undergraduate University Degree	Brazil	Other Central or South American or Mixed Race	Female	1- Predominantly heterosexual, only incidentally homosexual	24
1253	Condition 1	2b	2	b	60	25	Diploma	United States	None of these define my ethnic group	Female	1- Predominantly heterosexual, only incidentally homosexual	24
83	Condition 1	2b	2	b	35	24	Undergraduate University Degree	Australia	North Western European, British or Irish	Female	1- Predominantly heterosexual, only incidentally homosexual	24
620	Condition 1	2b	2	b	40	24	Post Graduate University Degree	United States	European Mixed Race	Female	1- Predominantly heterosexual, only incidentally homosexual	24
1780	Condition 1	2b	2	b	45	24	Undergraduate University Degree	United States	Chinese Asian	Female	1- Predominantly heterosexual, only incidentally homosexual	24
296	Condition 1	2b	2	b	60	24	Post Graduate University Degree	Australia	Mixed Race Australian	Female	1- Predominantly heterosexual, only incidentally homosexual	24
413	Condition 1	2b	2	b	40	23	Diploma	United States	European Mixed Race	Female	1- Predominantly heterosexual, only incidentally homosexual	24
1585	Condition 1	2b	2	b	45	23	Post Graduate University Degree	Other - East European	European Mixed Race	Female	1- Predominantly heterosexual, only incidentally homosexual	24
297	Condition 1	2b	2	b	50	23	Undergraduate University Degree	Australia	North Western European, British or Irish	Female	1- Predominantly heterosexual, only incidentally homosexual	24
20	Condition 1	2b	2	b	60	23	Undergraduate University Degree	Australia	South East Asian	Female	1- Predominantly heterosexual, only incidentally homosexual	24
289	Condition 1	2b	2	b	75	23	Undergraduate University Degree	Australia	South East Asian	Female	1- Predominantly heterosexual, only incidentally homosexual	24
1411	Condition 1	2b	2	b	55	22	Undergraduate University Degree	United States	North Western European, British or Irish	Female	1- Predominantly heterosexual, only incidentally homosexual	24
113	Condition 1	2b	2	b	80	22	Undergraduate University Degree	Australia	North Western European, British or Irish	Female	1- Predominantly heterosexual, only incidentally homosexual	24
86	Condition 1	2b	2	b	40	21	Undergraduate University Degree	Australia	North Western European, British or Irish	Female	1- Predominantly heterosexual, only incidentally homosexual	24
1809	Condition 1	2b	2	b	0	20	Diploma	New Zealand	New Zealand Peoples	Female	1- Predominantly heterosexual, only incidentally homosexual	24
160	Condition 1	2b	2	b	35	20	Undergraduate University Degree	Australia	Chinese Asian	Female	1- Predominantly heterosexual, only incidentally homosexual	24
448	Condition 1	2b	2	b	20	19	Undergraduate University Degree	United States	Native North American or First Nation	Female	1- Predominantly heterosexual, only incidentally homosexual	24
1764	Condition 1	2b	2	b	30	18	High School	Other - East European	South Eastern and Eastern European	Female	1- Predominantly heterosexual, only incidentally homosexual	24
477	Condition 1	2b	2	b	40	38	Undergraduate University Degree	United States	North Western European, British or Irish	Female	2- Predominantly heterosexual, but more than incidentally homosexual	24
880	Condition 1	2b	2	b	40	38	Post Graduate University Degree	United States	North Western European, British or Irish	Female	2- Predominantly heterosexual, but more than incidentally homosexual	24
1223	Condition 1	2b	2	b	70	38	Undergraduate University Degree	United States	European Mixed Race	Female	2- Predominantly heterosexual, but more than incidentally homosexual	24
1358	Condition 1	2b	2	b	60	36	High School	United States	European Mixed Race	Female	2- Predominantly heterosexual, but more than incidentally homosexual	24
1230	Condition 1	2b	2	b	65	31	Undergraduate University Degree	United States	European Mixed Race	Female	2- Predominantly heterosexual, but more than incidentally homosexual	24
1493	Condition 1	2b	2	b	40	29	High School	Mexico	Other Central or South American or Mixed Race	Female	2- Predominantly heterosexual, but more than incidentally homosexual	24
1324	Condition 1	2b	2	b	30	28	Undergraduate University Degree	United States	North Western European, British or Irish	Female	2- Predominantly heterosexual, but more than incidentally homosexual	24
1377	Condition 1	2b	2	b	35	23	Post Graduate University Degree	United States	European Mixed Race	Female	2- Predominantly heterosexual, but more than incidentally homosexual	24
1115	Condition 1	2b	2	b	65	22	Undergraduate University Degree	United States	Southern European	Female	2- Predominantly heterosexual, but more than incidentally homosexual	24
1130	Condition 1	2b	2	b	50	21	Diploma	Germany	North Western European, British or Irish	Female	2- Predominantly heterosexual, but more than incidentally homosexual	24
1229	Condition 1	2b	2	b	65	21	High School	New Zealand	European Mixed Race	Female	2- Predominantly heterosexual, but more than incidentally homosexual	24
924	Condition 1	2b	2	b	20	20	Undergraduate University Degree	United Kingdom	North Western European, British or Irish	Female	2- Predominantly heterosexual, but more than incidentally homosexual	24
404	Condition 1	2b	2	b	40	20	High School	United States	None of these define my ethnic group	Female	2- Predominantly heterosexual, but more than incidentally homosexual	24
489	Condition 1	2b	2	b	10	19	Undergraduate University Degree	Australia	South Eastern and Eastern European	Female	2- Predominantly heterosexual, but more than incidentally homosexual	24
466	Condition 1	2b	2	b	40	19	High School	Australia	North Western European, British or Irish	Female	2- Predominantly heterosexual, but more than incidentally homosexual	24
1300	Condition 1	2b	2	b	40	19	Diploma	Switzerland	Other Asian or Mixed Race Asian	Female	2- Predominantly heterosexual, but more than incidentally homosexual	24
423	Condition 1	2b	2	b	60	19	High School	United States	Other Asian or Mixed Race Asian	Female	2- Predominantly heterosexual, but more than incidentally homosexual	24
703	Condition 1	2b	2	b	40	40	Diploma	United States	None of these define my ethnic group	Female	3- Equally heterosexual and homosexual	24
1264	Condition 1	2b	2	b	70	30	Other/Two Associate's Degrees, 6 credits away from a Bachelor's Degree	United States	European Mixed Race	Female	3- Equally heterosexual and homosexual	24
1046	Condition 1	2b	2	b	55	26	Other/Technical Training + some college	United States	European Mixed Race	Female	3- Equally heterosexual and homosexual	24
583	Condition 1	2b	2	b	60	26	Post Graduate University Degree	United Kingdom	European Mixed Race	Female	3- Equally heterosexual and homosexual	24
696	Condition 1	2b	2	b	80	26	High School	United States	North Western European, British or Irish	Female	3- Equally heterosexual and homosexual	24
41	Condition 1	2b	2	b	15	23	Other/College	Australia	North Western European, British or Irish	Female	3- Equally heterosexual and homosexual	24
542	Condition 1	2b	2	b	55	23	Other/High school plus coaching certifications	Canada	North Western European, British or Irish	Female	3- Equally heterosexual and homosexual	24
278	Condition 1	2c	2	c	40	49	Diploma	Australia	Mixed Race Australian	Female	0- Exclusively heterosexual with no homosexual	24
1076	Condition 1	2c	2	c	35	48	Other/College Grad	Canada	North Western European, British or Irish	Female	0- Exclusively heterosexual with no homosexual	24
1480	Condition 1	2c	2	c	20	44	Undergraduate University Degree	United States	North Western European, British or Irish	Female	0- Exclusively heterosexual with no homosexual	24
1052	Condition 1	2c	2	c	60	42	Other/3 years college	United States	European Mixed Race	Female	0- Exclusively heterosexual with no homosexual	24
1982	Condition 1	2c	2	c	55	40	Post Graduate University Degree	France	Southern European	Female	0- Exclusively heterosexual with no homosexual	24
1892	Condition 1	2c	2	c	50	39	Post Graduate University Degree	Other - Southern America	Other Central or South American or Mixed Race	Female	0- Exclusively heterosexual with no homosexual	24
1613	Condition 1	2c	2	c	65	39	Diploma	United Kingdom	North Western European, British or Irish	Female	0- Exclusively heterosexual with no homosexual	24
352	Condition 1	2c	2	c	45	37	Undergraduate University Degree	United States	North Western European, British or Irish	Female	0- Exclusively heterosexual with no homosexual	24
1884	Condition 1	2c	2	c	50	37	Undergraduate University Degree	United States	South Eastern and Eastern European	Female	0- Exclusively heterosexual with no homosexual	24
1834	Condition 1	2c	2	c	30	36	Post Graduate University Degree	United Arab Emirates	South American	Female	0- Exclusively heterosexual with no homosexual	24
1129	Condition 1	2c	2	c	50	36	Undergraduate University Degree	United States	None of these define my ethnic group	Female	0- Exclusively heterosexual with no homosexual	24
639	Condition 1	2c	2	c	45	35	Diploma	United Kingdom	None of these define my ethnic group	Female	0- Exclusively heterosexual with no homosexual	24
571	Condition 1	2c	2	c	50	32	Diploma	Australia	North Western European, British or Irish	Female	0- Exclusively heterosexual with no homosexual	24
856	Condition 1	2c	2	c	35	31	Doctorate/PhD	Ireland	North Western European, British or Irish	Female	0- Exclusively heterosexual with no homosexual	24
927	Condition 1	2c	2	c	45	31	Undergraduate University Degree	United Kingdom	South Eastern and Eastern European	Female	0- Exclusively heterosexual with no homosexual	24
124	Condition 1	2c	2	c	55	31	Undergraduate University Degree	Australia	European Mixed Race	Female	0- Exclusively heterosexual with no homosexual	24
1118	Condition 1	2c	2	c	65	31	Post Graduate University Degree	United Kingdom	North Western European, British or Irish	Female	0- Exclusively heterosexual with no homosexual	24
1145	Condition 1	2c	2	c	65	31	Undergraduate University Degree	United States	None of these define my ethnic group	Female	0- Exclusively heterosexual with no homosexual	24
1256	Condition 1	2c	2	c	50	30	Post Graduate University Degree	Argentina	South American	Female	0- Exclusively heterosexual with no homosexual	24
684	Condition 1	2c	2	c	55	30	Post Graduate University Degree	United States	North Western European, British or Irish	Female	0- Exclusively heterosexual with no homosexual	24
1667	Condition 1	2c	2	c	60	30	Doctorate/PhD	Australia	North Western European, British or Irish	Female	0- Exclusively heterosexual with no homosexual	24
107	Condition 1	2c	2	c	65	30	Doctorate/PhD	China	None of these define my ethnic group	Female	0- Exclusively heterosexual with no homosexual	24
1822	Condition 1	2c	2	c	70	30	Undergraduate University Degree	United States	South Eastern and Eastern European	Female	0- Exclusively heterosexual with no homosexual	24
2002	Condition 1	2c	2	c	10	29	Doctorate/PhD	New Zealand	Chinese Asian	Female	0- Exclusively heterosexual with no homosexual	24
145	Condition 1	2c	2	c	40	29	Diploma	Australia	Other Asian or Mixed Race Asian	Female	0- Exclusively heterosexual with no homosexual	24
1426	Condition 1	2c	2	c	40	28	Undergraduate University Degree	United States	North Western European, British or Irish	Female	0- Exclusively heterosexual with no homosexual	24
556	Condition 1	2c	2	c	45	28	Doctorate/PhD	United States	Other Central or South American or Mixed Race	Female	0- Exclusively heterosexual with no homosexual	24
8	Condition 1	2c	2	c	50	28	Undergraduate University Degree	Australia	North Western European, British or Irish	Female	0- Exclusively heterosexual with no homosexual	24
935	Condition 1	2c	2	c	55	28	Undergraduate University Degree	Poland	South Eastern and Eastern European	Female	0- Exclusively heterosexual with no homosexual	24
1890	Condition 1	2c	2	c	55	28	Undergraduate University Degree	Malaysia	South East Asian	Female	0- Exclusively heterosexual with no homosexual	24
1342	Condition 1	2c	2	c	70	28	Post Graduate University Degree	United States	European Mixed Race	Female	0- Exclusively heterosexual with no homosexual	24
1543	Condition 1	2c	2	c	55	27	Doctorate/PhD	Germany	South American	Female	0- Exclusively heterosexual with no homosexual	24
606	Condition 1	2c	2	c	60	27	Doctorate/PhD	Greece	South Eastern and Eastern European	Female	0- Exclusively heterosexual with no homosexual	24
1072	Condition 1	2c	2	c	65	27	Diploma	Portugal	None of these define my ethnic group	Female	0- Exclusively heterosexual with no homosexual	24
1215	Condition 1	2c	2	c	80	27	Undergraduate University Degree	Germany	North Western European, British or Irish	Female	0- Exclusively heterosexual with no homosexual	24
1140	Condition 1	2c	2	c	35	26	Post Graduate University Degree	Chile	South American	Female	0- Exclusively heterosexual with no homosexual	24
109	Condition 1	2c	2	c	50	26	Doctorate/PhD	China	Chinese Asian	Female	0- Exclusively heterosexual with no homosexual	24
1338	Condition 1	2c	2	c	70	26	Post Graduate University Degree	Chile	South American	Female	0- Exclusively heterosexual with no homosexual	24
866	Condition 1	2c	2	c	55	24	Post Graduate University Degree	United Kingdom	European Mixed Race	Female	0- Exclusively heterosexual with no homosexual	24
1339	Condition 1	2c	2	c	55	24	Post Graduate University Degree	Japan	North Western European, British or Irish	Female	0- Exclusively heterosexual with no homosexual	24
1854	Condition 1	2c	2	c	55	24	High School	United Kingdom	North Western European, British or Irish	Female	0- Exclusively heterosexual with no homosexual	24
1312	Condition 1	2c	2	c	40	23	Undergraduate University Degree	Mexico	European Mixed Race	Female	0- Exclusively heterosexual with no homosexual	24
1389	Condition 1	2c	2	c	40	23	Post Graduate University Degree	Germany	Southern European	Female	0- Exclusively heterosexual with no homosexual	24
875	Condition 1	2c	2	c	55	23	Undergraduate University Degree	Australia	South Eastern and Eastern European	Female	0- Exclusively heterosexual with no homosexual	24
1415	Condition 1	2c	2	c	55	23	Post Graduate University Degree	Italy	European Mixed Race	Female	0- Exclusively heterosexual with no homosexual	24
1546	Condition 1	2c	2	c	60	23	Undergraduate University Degree	United Kingdom	North Western European, British or Irish	Female	0- Exclusively heterosexual with no homosexual	24
1169	Condition 1	2c	2	c	65	23	Undergraduate University Degree	Germany	North Western European, British or Irish	Female	0- Exclusively heterosexual with no homosexual	24
414	Condition 1	2c	2	c	25	22	Undergraduate University Degree	Other - East European	South Eastern and Eastern European	Female	0- Exclusively heterosexual with no homosexual	24
497	Condition 1	2c	2	c	60	22	Diploma	United States	Central American	Female	0- Exclusively heterosexual with no homosexual	24
953	Condition 1	2c	2	c	60	22	Undergraduate University Degree	Italy	European Mixed Race	Female	0- Exclusively heterosexual with no homosexual	24
1499	Condition 1	2c	2	c	35	21	Undergraduate University Degree	Germany	North Western European, British or Irish	Female	0- Exclusively heterosexual with no homosexual	24
376	Condition 1	2c	2	c	45	21	Undergraduate University Degree	United States	European Mixed Race	Female	0- Exclusively heterosexual with no homosexual	24
864	Condition 1	2c	2	c	45	21	High School	United Kingdom	North Western European, British or Irish	Female	0- Exclusively heterosexual with no homosexual	24
146	Condition 1	2c	2	c	50	21	Undergraduate University Degree	Australia	North Western European, British or Irish	Female	0- Exclusively heterosexual with no homosexual	24
983	Condition 1	2c	2	c	55	21	Undergraduate University Degree	United States	European Mixed Race	Female	0- Exclusively heterosexual with no homosexual	24
1623	Condition 1	2c	2	c	55	21	Undergraduate University Degree	Other - Middle East	South East Asian	Female	0- Exclusively heterosexual with no homosexual	24
1280	Condition 1	2c	2	c	60	21	Undergraduate University Degree	United States	European Mixed Race	Female	0- Exclusively heterosexual with no homosexual	24
814	Condition 1	2c	2	c	55	20	Undergraduate University Degree	Australia	European Mixed Race	Female	0- Exclusively heterosexual with no homosexual	24
908	Condition 1	2c	2	c	40	19	Undergraduate University Degree	United Kingdom	European Mixed Race	Female	0- Exclusively heterosexual with no homosexual	24
1249	Condition 1	2c	2	c	40	19	Undergraduate University Degree	India	Southern Asian	Female	0- Exclusively heterosexual with no homosexual	24
203	Condition 1	2c	2	c	45	19	High School	Australia	European Mixed Race	Female	0- Exclusively heterosexual with no homosexual	24
933	Condition 1	2c	2	c	50	19	High School	United States	European Mixed Race	Female	0- Exclusively heterosexual with no homosexual	24
323	Condition 1	2c	2	c	70	19	Undergraduate University Degree	Australia	North Western European, British or Irish	Female	0- Exclusively heterosexual with no homosexual	24
212	Condition 1	2c	2	c	85	19	Undergraduate University Degree	Australia	European Mixed Race	Female	0- Exclusively heterosexual with no homosexual	24
1678	Condition 1	2c	2	c	40	18	High School	United States	North Western European, British or Irish	Female	0- Exclusively heterosexual with no homosexual	24
1943	Condition 1	2c	2	c	50	18	High School	United States	North Western European, British or Irish	Female	0- Exclusively heterosexual with no homosexual	24
80	Condition 1	2c	2	c	55	18	Undergraduate University Degree	Australia	None of these define my ethnic group	Female	0- Exclusively heterosexual with no homosexual	24
226	Condition 1	2c	2	c	60	18	Undergraduate University Degree	Australia	South Eastern and Eastern European	Female	0- Exclusively heterosexual with no homosexual	24
1958	Condition 1	2c	2	c	55	19	High School	United Kingdom	North Western European, British or Irish	Female	0- Exclusively heterosexual with no homosexual, 1- Predominantly heterosexual, only incidentally homosexual	24
1825	Condition 1	2c	2	c	50	22	Undergraduate University Degree	United States	European Mixed Race	Female	0- Exclusively heterosexual with no homosexual, 1- Predominantly heterosexual, only incidentally homosexual, 2- Predominantly heterosexual, but more than incidentally homosexual, 3- Equally heterosexual and homosexual, 4- Predominantly homosexual, but more than incidentally heterosexual, 5- Predominantly homosexual, only incidentally heterosexual, 6- Exclusively homosexual	24
899	Condition 1	2c	2	c	55	45	Post Graduate University Degree	Australia	North Western European, British or Irish	Female	1- Predominantly heterosexual, only incidentally homosexual	24
1316	Condition 1	2c	2	c	60	40	Undergraduate University Degree	Canada	European Mixed Race	Female	1- Predominantly heterosexual, only incidentally homosexual	24
1747	Condition 1	2c	2	c	55	38	Undergraduate University Degree	United States	South Eastern and Eastern European	Female	1- Predominantly heterosexual, only incidentally homosexual	24
865	Condition 1	2c	2	c	75	36	Undergraduate University Degree	Denmark	European Mixed Race	Female	1- Predominantly heterosexual, only incidentally homosexual	24
895	Condition 1	2c	2	c	50	32	Undergraduate University Degree	Spain	Southern European	Female	1- Predominantly heterosexual, only incidentally homosexual	24
728	Condition 1	2c	2	c	55	32	Doctorate/PhD	Germany	North Western European, British or Irish	Female	1- Predominantly heterosexual, only incidentally homosexual	24
970	Condition 1	2c	2	c	30	31	High School	Isreal	North African or Middle Eastern Jewish	Female	1- Predominantly heterosexual, only incidentally homosexual	24
622	Condition 1	2c	2	c	65	31	Post Graduate University Degree	Other - East European	North Western European, British or Irish	Female	1- Predominantly heterosexual, only incidentally homosexual	24
1290	Condition 1	2c	2	c	65	30	Other/Trade School	United States	South Eastern and Eastern European	Female	1- Predominantly heterosexual, only incidentally homosexual	24
1964	Condition 1	2c	2	c	50	29	High School	United States	European Mixed Race	Female	1- Predominantly heterosexual, only incidentally homosexual	24
931	Condition 1	2c	2	c	70	29	Post Graduate University Degree	Australia	North Western European, British or Irish	Female	1- Predominantly heterosexual, only incidentally homosexual	24
72	Condition 1	2c	2	c	85	29	Post Graduate University Degree	Australia	Mixed Race Australian	Female	1- Predominantly heterosexual, only incidentally homosexual	24
1271	Condition 1	2c	2	c	50	28	Undergraduate University Degree	United States	None of these define my ethnic group	Female	1- Predominantly heterosexual, only incidentally homosexual	24
23	Condition 1	2c	2	c	70	28	Undergraduate University Degree	Australia	Other Asian or Mixed Race Asian	Female	1- Predominantly heterosexual, only incidentally homosexual	24
61	Condition 1	2c	2	c	75	27	Undergraduate University Degree	Australia	North Western European, British or Irish	Female	1- Predominantly heterosexual, only incidentally homosexual	24
1721	Condition 1	2c	2	c	80	27	Doctorate/PhD	United States	South Eastern and Eastern European	Female	1- Predominantly heterosexual, only incidentally homosexual	24
1382	Condition 1	2c	2	c	85	27	High School	United States	European Mixed Race	Female	1- Predominantly heterosexual, only incidentally homosexual	24
1373	Condition 1	2c	2	c	30	26	High School	United States	North Western European, British or Irish	Female	1- Predominantly heterosexual, only incidentally homosexual	24
731	Condition 1	2c	2	c	40	26	Undergraduate University Degree	Italy	North Western European, British or Irish	Female	1- Predominantly heterosexual, only incidentally homosexual	24
1857	Condition 1	2c	2	c	40	26	Post Graduate University Degree	Spain	European Mixed Race	Female	1- Predominantly heterosexual, only incidentally homosexual	24
2007	Condition 1	2c	2	c	60	25	Undergraduate University Degree	Canada	North Western European, British or Irish	Female	1- Predominantly heterosexual, only incidentally homosexual	24
1261	Condition 1	2c	2	c	75	25	Undergraduate University Degree	United States	North Western European, British or Irish	Female	1- Predominantly heterosexual, only incidentally homosexual	24
1740	Condition 1	2c	2	c	50	24	High School	United States	Southern European	Female	1- Predominantly heterosexual, only incidentally homosexual	24
1252	Condition 1	2c	2	c	70	24	Undergraduate University Degree	Canada	North Western European, British or Irish	Female	1- Predominantly heterosexual, only incidentally homosexual	24
134	Condition 1	2c	2	c	20	23	High School	Australia	North Western European, British or Irish	Female	1- Predominantly heterosexual, only incidentally homosexual	24
1889	Condition 1	2c	2	c	30	23	Doctorate/PhD	United States	Southern Asian	Female	1- Predominantly heterosexual, only incidentally homosexual	24
1677	Condition 1	2c	2	c	35	23	Other/In college	United States	Other Central or South American or Mixed Race	Female	1- Predominantly heterosexual, only incidentally homosexual	24
263	Condition 1	2c	2	c	50	23	Undergraduate University Degree	Australia	North Western European, British or Irish	Female	1- Predominantly heterosexual, only incidentally homosexual	24
3	Condition 1	2c	2	c	40	22	Undergraduate University Degree	Australia	Southern Asian	Female	1- Predominantly heterosexual, only incidentally homosexual	24
276	Condition 1	2c	2	c	50	22	Undergraduate University Degree	Australia	Chinese Asian	Female	1- Predominantly heterosexual, only incidentally homosexual	24
211	Condition 1	2c	2	c	15	21	Undergraduate University Degree	Australia	Chinese Asian	Female	1- Predominantly heterosexual, only incidentally homosexual	24
820	Condition 1	2c	2	c	55	21	Diploma	Other - East European	South Eastern and Eastern European	Female	1- Predominantly heterosexual, only incidentally homosexual	24
224	Condition 1	2c	2	c	60	21	Undergraduate University Degree	Australia	North Western European, British or Irish	Female	1- Predominantly heterosexual, only incidentally homosexual	24
1044	Condition 1	2c	2	c	70	21	Undergraduate University Degree	Australia	Mixed Race Australian	Female	1- Predominantly heterosexual, only incidentally homosexual	24
308	Condition 1	2c	2	c	40	20	High School	Australia	Southern Asian	Female	1- Predominantly heterosexual, only incidentally homosexual	24
213	Condition 1	2c	2	c	50	20	Undergraduate University Degree	Australia	Chinese Asian	Female	1- Predominantly heterosexual, only incidentally homosexual	24
656	Condition 1	2c	2	c	60	20	High School	Czech Republic	European Mixed Race	Female	1- Predominantly heterosexual, only incidentally homosexual	24
1664	Condition 1	2c	2	c	60	20	High School	United States	Central American	Female	1- Predominantly heterosexual, only incidentally homosexual	24
1439	Condition 1	2c	2	c	75	20	Undergraduate University Degree	United Kingdom	North Western European, British or Irish	Female	1- Predominantly heterosexual, only incidentally homosexual	24
1956	Condition 1	2c	2	c	50	19	High School	United States	European Mixed Race	Female	1- Predominantly heterosexual, only incidentally homosexual	24
1701	Condition 1	2c	2	c	55	19	Undergraduate University Degree	United Kingdom	North Western European, British or Irish	Female	1- Predominantly heterosexual, only incidentally homosexual	24
1731	Condition 1	2c	2	c	75	19	Undergraduate University Degree	Canada	Chinese Asian	Female	1- Predominantly heterosexual, only incidentally homosexual	24
738	Condition 1	2c	2	c	40	18	High School	United Kingdom	North Western European, British or Irish	Female	1- Predominantly heterosexual, only incidentally homosexual	24
799	Condition 1	2c	2	c	70	32	Undergraduate University Degree	United States	Central American	Female	2- Predominantly heterosexual, but more than incidentally homosexual	24
1348	Condition 1	2c	2	c	50	30	Undergraduate University Degree	United States	North Western European, British or Irish	Female	2- Predominantly heterosexual, but more than incidentally homosexual	24
1310	Condition 1	2c	2	c	55	29	Undergraduate University Degree	United States	None of these define my ethnic group	Female	2- Predominantly heterosexual, but more than incidentally homosexual	24
1589	Condition 1	2c	2	c	75	26	Other/Some college	United States	None of these define my ethnic group	Female	2- Predominantly heterosexual, but more than incidentally homosexual	24
1122	Condition 1	2c	2	c	50	25	Undergraduate University Degree	United States	European Mixed Race	Female	2- Predominantly heterosexual, but more than incidentally homosexual	24
1531	Condition 1	2c	2	c	40	23	High School	Netherlands	Southern European	Female	2- Predominantly heterosexual, but more than incidentally homosexual	24
535	Condition 1	2c	2	c	50	23	Undergraduate University Degree	United States	European Mixed Race	Female	2- Predominantly heterosexual, but more than incidentally homosexual	24
1593	Condition 1	2c	2	c	35	22	Diploma	United States	North Western European, British or Irish	Female	2- Predominantly heterosexual, but more than incidentally homosexual	24
1662	Condition 1	2c	2	c	40	21	Undergraduate University Degree	United States	European Mixed Race	Female	2- Predominantly heterosexual, but more than incidentally homosexual	24
230	Condition 1	2c	2	c	45	20	Undergraduate University Degree	Australia	Mixed Race Australian	Female	2- Predominantly heterosexual, but more than incidentally homosexual	24
461	Condition 1	2c	2	c	55	20	High School	Australia	North Western European, British or Irish	Female	2- Predominantly heterosexual, but more than incidentally homosexual	24
1175	Condition 1	2c	2	c	60	20	High School	United States	None of these define my ethnic group	Female	2- Predominantly heterosexual, but more than incidentally homosexual	24
1400	Condition 1	2c	2	c	45	18	High School	Chile	European Mixed Race	Female	2- Predominantly heterosexual, but more than incidentally homosexual	24
1863	Condition 1	2c	2	c	70	37	Post Graduate University Degree	United States	South Eastern and Eastern European	Female	3- Equally heterosexual and homosexual	24
1102	Condition 1	2c	2	c	75	37	Doctorate/PhD	United States	South Eastern and Eastern European	Female	3- Equally heterosexual and homosexual	24
1855	Condition 1	2c	2	c	45	35	High School	United States	Southern European	Female	3- Equally heterosexual and homosexual	24
1206	Condition 1	2c	2	c	75	35	Post Graduate University Degree	United States	None of these define my ethnic group	Female	3- Equally heterosexual and homosexual	24
395	Condition 1	2c	2	c	65	33	Post Graduate University Degree	United States	None of these define my ethnic group	Female	3- Equally heterosexual and homosexual	24
418	Condition 1	2c	2	c	55	32	Undergraduate University Degree	United States	European Mixed Race	Female	3- Equally heterosexual and homosexual	24
516	Condition 1	2c	2	c	30	27	Diploma	Serbia	Southern European	Female	3- Equally heterosexual and homosexual	24
1534	Condition 1	2c	2	c	70	26	High School	United States	Native North American or First Nation	Female	3- Equally heterosexual and homosexual	24
1240	Condition 1	2c	2	c	60	24	Diploma	Canada	North Western European, British or Irish	Female	3- Equally heterosexual and homosexual	24
43	Condition 1	2c	2	c	50	22	Undergraduate University Degree	Australia	South East Asian	Female	3- Equally heterosexual and homosexual	24
1315	Condition 1	2c	2	c	30	19	Undergraduate University Degree	France	European Mixed Race	Female	3- Equally heterosexual and homosexual	24
278	Condition 1	4a	4	a	50	49	Diploma	Australia	Mixed Race Australian	Female	0- Exclusively heterosexual with no homosexual	43
268	Condition 1	4a	4	a	75	45	Undergraduate University Degree	Australia	North Western European, British or Irish	Female	0- Exclusively heterosexual with no homosexual	43
1929	Condition 1	4a	4	a	60	44	Undergraduate University Degree	United States	European Mixed Race	Female	0- Exclusively heterosexual with no homosexual	43
309	Condition 1	4a	4	a	50	40	Undergraduate University Degree	Australia	North Western European, British or Irish	Female	0- Exclusively heterosexual with no homosexual	43
1982	Condition 1	4a	4	a	55	40	Post Graduate University Degree	France	Southern European	Female	0- Exclusively heterosexual with no homosexual	43
513	Condition 1	4a	4	a	85	40	High School	Australia	North Western European, British or Irish	Female	0- Exclusively heterosexual with no homosexual	43
1613	Condition 1	4a	4	a	65	39	Diploma	United Kingdom	North Western European, British or Irish	Female	0- Exclusively heterosexual with no homosexual	43
673	Condition 1	4a	4	a	70	38	Post Graduate University Degree	Sweden	North Western European, British or Irish	Female	0- Exclusively heterosexual with no homosexual	43
1605	Condition 1	4a	4	a	70	38	Doctorate/PhD	United States	European Mixed Race	Female	0- Exclusively heterosexual with no homosexual	43
332	Condition 1	4a	4	a	70	37	High School	Australia	North Western European, British or Irish	Female	0- Exclusively heterosexual with no homosexual	43
59	Condition 1	4a	4	a	50	34	Undergraduate University Degree	Australia	Mixed Race Australian	Female	0- Exclusively heterosexual with no homosexual	43
1432	Condition 1	4a	4	a	60	34	Diploma	Canada	North Western European, British or Irish	Female	0- Exclusively heterosexual with no homosexual	43
1723	Condition 1	4a	4	a	75	34	Undergraduate University Degree	New Zealand	North Western European, British or Irish	Female	0- Exclusively heterosexual with no homosexual	43
1417	Condition 1	4a	4	a	70	33	Post Graduate University Degree	Other - Southern America	None of these define my ethnic group	Female	0- Exclusively heterosexual with no homosexual	43
1669	Condition 1	4a	4	a	75	33	Undergraduate University Degree	Egypt	North African or Middle Eastern Arab	Female	0- Exclusively heterosexual with no homosexual	43
1368	Condition 1	4a	4	a	50	32	Undergraduate University Degree	United States	Central American	Female	0- Exclusively heterosexual with no homosexual	43
494	Condition 1	4a	4	a	70	32	Post Graduate University Degree	Isreal	None of these define my ethnic group	Female	0- Exclusively heterosexual with no homosexual	43
856	Condition 1	4a	4	a	50	31	Doctorate/PhD	Ireland	North Western European, British or Irish	Female	0- Exclusively heterosexual with no homosexual	43
1145	Condition 1	4a	4	a	60	31	Undergraduate University Degree	United States	None of these define my ethnic group	Female	0- Exclusively heterosexual with no homosexual	43
1118	Condition 1	4a	4	a	65	31	Post Graduate University Degree	United Kingdom	North Western European, British or Irish	Female	0- Exclusively heterosexual with no homosexual	43
684	Condition 1	4a	4	a	45	30	Post Graduate University Degree	United States	North Western European, British or Irish	Female	0- Exclusively heterosexual with no homosexual	43
968	Condition 1	4a	4	a	70	30	Post Graduate University Degree	Brazil	South American	Female	0- Exclusively heterosexual with no homosexual	43
1202	Condition 1	4a	4	a	70	30	Undergraduate University Degree	United States	North Western European, British or Irish	Female	0- Exclusively heterosexual with no homosexual	43
1822	Condition 1	4a	4	a	90	30	Undergraduate University Degree	United States	South Eastern and Eastern European	Female	0- Exclusively heterosexual with no homosexual	43
2002	Condition 1	4a	4	a	55	29	Doctorate/PhD	New Zealand	Chinese Asian	Female	0- Exclusively heterosexual with no homosexual	43
1719	Condition 1	4a	4	a	70	29	Undergraduate University Degree	United States	Native American Mixed Race	Female	0- Exclusively heterosexual with no homosexual	43
8	Condition 1	4a	4	a	55	28	Undergraduate University Degree	Australia	North Western European, British or Irish	Female	0- Exclusively heterosexual with no homosexual	43
1426	Condition 1	4a	4	a	55	28	Undergraduate University Degree	United States	North Western European, British or Irish	Female	0- Exclusively heterosexual with no homosexual	43
1509	Condition 1	4a	4	a	70	28	Other/Currently enrolled in college	United States	None of these define my ethnic group	Female	0- Exclusively heterosexual with no homosexual	43
636	Condition 1	4a	4	a	70	27	Undergraduate University Degree	United States	Native American Mixed Race	Female	0- Exclusively heterosexual with no homosexual	43
1872	Condition 1	4a	4	a	70	27	Post Graduate University Degree	Germany	European Mixed Race	Female	0- Exclusively heterosexual with no homosexual	43
1338	Condition 1	4a	4	a	70	26	Post Graduate University Degree	Chile	South American	Female	0- Exclusively heterosexual with no homosexual	43
1140	Condition 1	4a	4	a	75	26	Post Graduate University Degree	Chile	South American	Female	0- Exclusively heterosexual with no homosexual	43
1339	Condition 1	4a	4	a	60	24	Post Graduate University Degree	Japan	North Western European, British or Irish	Female	0- Exclusively heterosexual with no homosexual	43
725	Condition 1	4a	4	a	70	24	Undergraduate University Degree	United States	Chinese Asian	Female	0- Exclusively heterosexual with no homosexual	43
1169	Condition 1	4a	4	a	45	23	Undergraduate University Degree	Germany	North Western European, British or Irish	Female	0- Exclusively heterosexual with no homosexual	43
1332	Condition 1	4a	4	a	50	23	Undergraduate University Degree	Germany	European Mixed Race	Female	0- Exclusively heterosexual with no homosexual	43
875	Condition 1	4a	4	a	65	23	Undergraduate University Degree	Australia	South Eastern and Eastern European	Female	0- Exclusively heterosexual with no homosexual	43
480	Condition 1	4a	4	a	35	22	Undergraduate University Degree	India	South East Asian	Female	0- Exclusively heterosexual with no homosexual	43
1334	Condition 1	4a	4	a	50	22	Undergraduate University Degree	Hungary	South Eastern and Eastern European	Female	0- Exclusively heterosexual with no homosexual	43
860	Condition 1	4a	4	a	65	22	High School	Sweden	European Mixed Race	Female	0- Exclusively heterosexual with no homosexual	43
1578	Condition 1	4a	4	a	75	22	Undergraduate University Degree	United States	European Mixed Race	Female	0- Exclusively heterosexual with no homosexual	43
864	Condition 1	4a	4	a	50	21	High School	United Kingdom	North Western European, British or Irish	Female	0- Exclusively heterosexual with no homosexual	43
1499	Condition 1	4a	4	a	55	21	Undergraduate University Degree	Germany	North Western European, British or Irish	Female	0- Exclusively heterosexual with no homosexual	43
983	Condition 1	4a	4	a	70	21	Undergraduate University Degree	United States	European Mixed Race	Female	0- Exclusively heterosexual with no homosexual	43
201	Condition 1	4a	4	a	50	20	Undergraduate University Degree	Australia	North Western European, British or Irish	Female	0- Exclusively heterosexual with no homosexual	43
814	Condition 1	4a	4	a	50	20	Undergraduate University Degree	Australia	European Mixed Race	Female	0- Exclusively heterosexual with no homosexual	43
1491	Condition 1	4a	4	a	55	20	Undergraduate University Degree	Brazil	South American	Female	0- Exclusively heterosexual with no homosexual	43
1397	Condition 1	4a	4	a	60	20	Undergraduate University Degree	Portugal	Southern European	Female	0- Exclusively heterosexual with no homosexual	43
185	Condition 1	4a	4	a	65	20	Undergraduate University Degree	Australia	South East Asian	Female	0- Exclusively heterosexual with no homosexual	43
908	Condition 1	4a	4	a	35	19	Undergraduate University Degree	United Kingdom	European Mixed Race	Female	0- Exclusively heterosexual with no homosexual	43
203	Condition 1	4a	4	a	40	19	High School	Australia	European Mixed Race	Female	0- Exclusively heterosexual with no homosexual	43
1249	Condition 1	4a	4	a	40	19	Undergraduate University Degree	India	Southern Asian	Female	0- Exclusively heterosexual with no homosexual	43
155	Condition 1	4a	4	a	50	19	High School	Australia	North Western European, British or Irish	Female	0- Exclusively heterosexual with no homosexual	43
630	Condition 1	4a	4	a	85	19	Undergraduate University Degree	United Kingdom	North Western European, British or Irish	Female	0- Exclusively heterosexual with no homosexual	43
1316	Condition 1	4a	4	a	65	40	Undergraduate University Degree	Canada	European Mixed Race	Female	1- Predominantly heterosexual, only incidentally homosexual	43
1602	Condition 1	4a	4	a	80	39	Post Graduate University Degree	United States	South Eastern and Eastern European	Female	1- Predominantly heterosexual, only incidentally homosexual	43
1971	Condition 1	4a	4	a	75	37	Post Graduate University Degree	United States	South Eastern and Eastern European	Female	1- Predominantly heterosexual, only incidentally homosexual	43
378	Condition 1	4a	4	a	60	36	Post Graduate University Degree	United States	North Western European, British or Irish	Female	1- Predominantly heterosexual, only incidentally homosexual	43
1990	Condition 1	4a	4	a	40	33	Other/Associates Degree in Nursing	United States	European Mixed Race	Female	1- Predominantly heterosexual, only incidentally homosexual	43
1617	Condition 1	4a	4	a	60	32	Diploma	Canada	North Western European, British or Irish	Female	1- Predominantly heterosexual, only incidentally homosexual	43
35	Condition 1	4a	4	a	60	31	High School	United Kingdom	South Eastern and Eastern European	Female	1- Predominantly heterosexual, only incidentally homosexual	43
1186	Condition 1	4a	4	a	75	31	Undergraduate University Degree	United States	European Mixed Race	Female	1- Predominantly heterosexual, only incidentally homosexual	43
949	Condition 1	4a	4	a	80	31	Undergraduate University Degree	United States	None of these define my ethnic group	Female	1- Predominantly heterosexual, only incidentally homosexual	43
905	Condition 1	4a	4	a	45	30	Post Graduate University Degree	United States	European Mixed Race	Female	1- Predominantly heterosexual, only incidentally homosexual	43
1964	Condition 1	4a	4	a	50	29	High School	United States	European Mixed Race	Female	1- Predominantly heterosexual, only incidentally homosexual	43
302	Condition 1	4a	4	a	65	29	Undergraduate University Degree	Australia	Mixed Race Australian	Female	1- Predominantly heterosexual, only incidentally homosexual	43
1648	Condition 1	4a	4	a	50	27	Undergraduate University Degree	United States	North Western European, British or Irish	Female	1- Predominantly heterosexual, only incidentally homosexual	43
1721	Condition 1	4a	4	a	70	27	Doctorate/PhD	United States	South Eastern and Eastern European	Female	1- Predominantly heterosexual, only incidentally homosexual	43
956	Condition 1	4a	4	a	75	27	Post Graduate University Degree	Netherlands	North Western European, British or Irish	Female	1- Predominantly heterosexual, only incidentally homosexual	43
1373	Condition 1	4a	4	a	40	26	High School	United States	North Western European, British or Irish	Female	1- Predominantly heterosexual, only incidentally homosexual	43
1857	Condition 1	4a	4	a	55	26	Post Graduate University Degree	Spain	European Mixed Race	Female	1- Predominantly heterosexual, only incidentally homosexual	43
785	Condition 1	4a	4	a	40	25	Undergraduate University Degree	Norway	North Western European, British or Irish	Female	1- Predominantly heterosexual, only incidentally homosexual	43
1216	Condition 1	4a	4	a	60	25	Undergraduate University Degree	United Kingdom	Southern Asian	Female	1- Predominantly heterosexual, only incidentally homosexual	43
986	Condition 1	4a	4	a	65	25	Undergraduate University Degree	United States	North African or Middle Eastern Arab	Female	1- Predominantly heterosexual, only incidentally homosexual	43
620	Condition 1	4a	4	a	40	24	Post Graduate University Degree	United States	European Mixed Race	Female	1- Predominantly heterosexual, only incidentally homosexual	43
83	Condition 1	4a	4	a	45	24	Undergraduate University Degree	Australia	North Western European, British or Irish	Female	1- Predominantly heterosexual, only incidentally homosexual	43
296	Condition 1	4a	4	a	70	24	Post Graduate University Degree	Australia	Mixed Race Australian	Female	1- Predominantly heterosexual, only incidentally homosexual	43
1677	Condition 1	4a	4	a	50	23	Other/In college	United States	Other Central or South American or Mixed Race	Female	1- Predominantly heterosexual, only incidentally homosexual	43
1626	Condition 1	4a	4	a	60	23	Undergraduate University Degree	United Kingdom	North Western European, British or Irish	Female	1- Predominantly heterosexual, only incidentally homosexual	43
1585	Condition 1	4a	4	a	65	23	Post Graduate University Degree	Other - East European	European Mixed Race	Female	1- Predominantly heterosexual, only incidentally homosexual	43
297	Condition 1	4a	4	a	70	23	Undergraduate University Degree	Australia	North Western European, British or Irish	Female	1- Predominantly heterosexual, only incidentally homosexual	43
1861	Condition 1	4a	4	a	75	23	Undergraduate University Degree	Spain	North Western European, British or Irish	Female	1- Predominantly heterosexual, only incidentally homosexual	43
3	Condition 1	4a	4	a	65	22	Undergraduate University Degree	Australia	Southern Asian	Female	1- Predominantly heterosexual, only incidentally homosexual	43
756	Condition 1	4a	4	a	70	22	Diploma	United States	North Western European, British or Irish	Female	1- Predominantly heterosexual, only incidentally homosexual	43
86	Condition 1	4a	4	a	35	21	Undergraduate University Degree	Australia	North Western European, British or Irish	Female	1- Predominantly heterosexual, only incidentally homosexual	43
1734	Condition 1	4a	4	a	40	21	Undergraduate University Degree	Germany	North Western European, British or Irish	Female	1- Predominantly heterosexual, only incidentally homosexual	43
224	Condition 1	4a	4	a	55	21	Undergraduate University Degree	Australia	North Western European, British or Irish	Female	1- Predominantly heterosexual, only incidentally homosexual	43
213	Condition 1	4a	4	a	25	20	Undergraduate University Degree	Australia	Chinese Asian	Female	1- Predominantly heterosexual, only incidentally homosexual	43
792	Condition 1	4a	4	a	40	20	High School	United States	North Western European, British or Irish	Female	1- Predominantly heterosexual, only incidentally homosexual	43
813	Condition 1	4a	4	a	45	20	Undergraduate University Degree	Ireland	North Western European, British or Irish	Female	1- Predominantly heterosexual, only incidentally homosexual	43
308	Condition 1	4a	4	a	55	20	High School	Australia	Southern Asian	Female	1- Predominantly heterosexual, only incidentally homosexual	43
1702	Condition 1	4a	4	a	40	19	High School	Portugal	Southern European	Female	1- Predominantly heterosexual, only incidentally homosexual	43
1731	Condition 1	4a	4	a	65	19	Undergraduate University Degree	Canada	Chinese Asian	Female	1- Predominantly heterosexual, only incidentally homosexual	43
576	Condition 1	4a	4	a	70	19	High School	United Kingdom	Chinese Asian	Female	1- Predominantly heterosexual, only incidentally homosexual	43
1956	Condition 1	4a	4	a	75	19	High School	United States	European Mixed Race	Female	1- Predominantly heterosexual, only incidentally homosexual	43
429	Condition 1	4a	4	a	60	18	High School	Mexico	Central American	Female	1- Predominantly heterosexual, only incidentally homosexual	43
880	Condition 1	4a	4	a	45	38	Post Graduate University Degree	United States	North Western European, British or Irish	Female	2- Predominantly heterosexual, but more than incidentally homosexual	43
1223	Condition 1	4a	4	a	75	38	Undergraduate University Degree	United States	European Mixed Race	Female	2- Predominantly heterosexual, but more than incidentally homosexual	43
799	Condition 1	4a	4	a	70	32	Undergraduate University Degree	United States	Central American	Female	2- Predominantly heterosexual, but more than incidentally homosexual	43
1230	Condition 1	4a	4	a	75	31	Undergraduate University Degree	United States	European Mixed Race	Female	2- Predominantly heterosexual, but more than incidentally homosexual	43
1310	Condition 1	4a	4	a	60	29	Undergraduate University Degree	United States	None of these define my ethnic group	Female	2- Predominantly heterosexual, but more than incidentally homosexual	43
1865	Condition 1	4a	4	a	65	26	Post Graduate University Degree	United Kingdom	South East Asian	Female	2- Predominantly heterosexual, but more than incidentally homosexual	43
1589	Condition 1	4a	4	a	70	26	Other/Some college	United States	None of these define my ethnic group	Female	2- Predominantly heterosexual, but more than incidentally homosexual	43
1593	Condition 1	4a	4	a	40	22	Diploma	United States	North Western European, British or Irish	Female	2- Predominantly heterosexual, but more than incidentally homosexual	43
833	Condition 1	4a	4	a	60	22	Undergraduate University Degree	United Kingdom	North Western European, British or Irish	Female	2- Predominantly heterosexual, but more than incidentally homosexual	43
924	Condition 1	4a	4	a	15	20	Undergraduate University Degree	United Kingdom	North Western European, British or Irish	Female	2- Predominantly heterosexual, but more than incidentally homosexual	43
423	Condition 1	4a	4	a	70	19	High School	United States	Other Asian or Mixed Race Asian	Female	2- Predominantly heterosexual, but more than incidentally homosexual	43
996	Condition 1	4a	4	a	5	18	High School	Croatia	None of these define my ethnic group	Female	2- Predominantly heterosexual, but more than incidentally homosexual	43
1102	Condition 1	4a	4	a	70	37	Doctorate/PhD	United States	South Eastern and Eastern European	Female	3- Equally heterosexual and homosexual	43
1855	Condition 1	4a	4	a	70	35	High School	United States	Southern European	Female	3- Equally heterosexual and homosexual	43
418	Condition 1	4a	4	a	50	32	Undergraduate University Degree	United States	European Mixed Race	Female	3- Equally heterosexual and homosexual	43
516	Condition 1	4a	4	a	50	27	Diploma	Serbia	Southern European	Female	3- Equally heterosexual and homosexual	43
1046	Condition 1	4a	4	a	50	26	Other/Technical Training + some college	United States	European Mixed Race	Female	3- Equally heterosexual and homosexual	43
1534	Condition 1	4a	4	a	70	26	High School	United States	Native North American or First Nation	Female	3- Equally heterosexual and homosexual	43
372	Condition 1	4a	4	a	45	25	Post Graduate University Degree	Australia	North Western European, British or Irish	Female	3- Equally heterosexual and homosexual	43
542	Condition 1	4a	4	a	70	23	Other/High school plus coaching certifications	Canada	North Western European, British or Irish	Female	3- Equally heterosexual and homosexual	43
1262	Condition 1	4a	4	a	75	20	Undergraduate University Degree	Netherlands	None of these define my ethnic group	Female	3- Equally heterosexual and homosexual	43
1053	Condition 1	4b	4	b	80	51	Undergraduate University Degree	United States	South Eastern and Eastern European	Female	0- Exclusively heterosexual with no homosexual	43
1245	Condition 1	4b	4	b	90	45	Post Graduate University Degree	United Arab Emirates	Other Central or South American or Mixed Race	Female	0- Exclusively heterosexual with no homosexual	43
1480	Condition 1	4b	4	b	35	44	Undergraduate University Degree	United States	North Western European, British or Irish	Female	0- Exclusively heterosexual with no homosexual	43
1052	Condition 1	4b	4	b	85	42	Other/3 years college	United States	European Mixed Race	Female	0- Exclusively heterosexual with no homosexual	43
830	Condition 1	4b	4	b	40	40	Doctorate/PhD	United States	North Western European, British or Irish	Female	0- Exclusively heterosexual with no homosexual	43
1201	Condition 1	4b	4	b	70	40	Undergraduate University Degree	Canada	North Western European, British or Irish	Female	0- Exclusively heterosexual with no homosexual	43
1892	Condition 1	4b	4	b	40	39	Post Graduate University Degree	Other - Southern America	Other Central or South American or Mixed Race	Female	0- Exclusively heterosexual with no homosexual	43
352	Condition 1	4b	4	b	55	37	Undergraduate University Degree	United States	North Western European, British or Irish	Female	0- Exclusively heterosexual with no homosexual	43
1884	Condition 1	4b	4	b	75	37	Undergraduate University Degree	United States	South Eastern and Eastern European	Female	0- Exclusively heterosexual with no homosexual	43
1897	Condition 1	4b	4	b	80	36	Post Graduate University Degree	United States	European Mixed Race	Female	0- Exclusively heterosexual with no homosexual	43
639	Condition 1	4b	4	b	65	35	Diploma	United Kingdom	None of these define my ethnic group	Female	0- Exclusively heterosexual with no homosexual	43
960	Condition 1	4b	4	b	65	35	Undergraduate University Degree	United States	North Western European, British or Irish	Female	0- Exclusively heterosexual with no homosexual	43
1985	Condition 1	4b	4	b	70	35	Undergraduate University Degree	Brazil	Southern European	Female	0- Exclusively heterosexual with no homosexual	43
1017	Condition 1	4b	4	b	40	34	Undergraduate University Degree	Canada	North Western European, British or Irish	Female	0- Exclusively heterosexual with no homosexual	43
327	Condition 1	4b	4	b	55	34	High School	Belgium	North Western European, British or Irish	Female	0- Exclusively heterosexual with no homosexual	43
1484	Condition 1	4b	4	b	70	33	Other/some college	United States	None of these define my ethnic group	Female	0- Exclusively heterosexual with no homosexual	43
571	Condition 1	4b	4	b	55	32	Diploma	Australia	North Western European, British or Irish	Female	0- Exclusively heterosexual with no homosexual	43
927	Condition 1	4b	4	b	55	31	Undergraduate University Degree	United Kingdom	South Eastern and Eastern European	Female	0- Exclusively heterosexual with no homosexual	43
1685	Condition 1	4b	4	b	70	31	Post Graduate University Degree	United States	European Mixed Race	Female	0- Exclusively heterosexual with no homosexual	43
107	Condition 1	4b	4	b	50	30	Doctorate/PhD	China	None of these define my ethnic group	Female	0- Exclusively heterosexual with no homosexual	43
1431	Condition 1	4b	4	b	70	30	Undergraduate University Degree	Other - East European	South Eastern and Eastern European	Female	0- Exclusively heterosexual with no homosexual	43
145	Condition 1	4b	4	b	50	29	Diploma	Australia	Other Asian or Mixed Race Asian	Female	0- Exclusively heterosexual with no homosexual	43
1086	Condition 1	4b	4	b	75	29	Undergraduate University Degree	United States	European Mixed Race	Female	0- Exclusively heterosexual with no homosexual	43
913	Condition 1	4b	4	b	85	29	Undergraduate University Degree	Portugal	Southern European	Female	0- Exclusively heterosexual with no homosexual	43
1986	Condition 1	4b	4	b	50	28	Doctorate/PhD	United Kingdom	Southern and East Africa	Female	0- Exclusively heterosexual with no homosexual	43
1890	Condition 1	4b	4	b	60	28	Undergraduate University Degree	Malaysia	South East Asian	Female	0- Exclusively heterosexual with no homosexual	43
314	Condition 1	4b	4	b	80	28	Undergraduate University Degree	Australia	Chinese Asian	Female	0- Exclusively heterosexual with no homosexual	43
1342	Condition 1	4b	4	b	95	28	Post Graduate University Degree	United States	European Mixed Race	Female	0- Exclusively heterosexual with no homosexual	43
606	Condition 1	4b	4	b	60	27	Doctorate/PhD	Greece	South Eastern and Eastern European	Female	0- Exclusively heterosexual with no homosexual	43
632	Condition 1	4b	4	b	80	27	Post Graduate University Degree	France	North Western European, British or Irish	Female	0- Exclusively heterosexual with no homosexual	43
1215	Condition 1	4b	4	b	90	27	Undergraduate University Degree	Germany	North Western European, British or Irish	Female	0- Exclusively heterosexual with no homosexual	43
1341	Condition 1	4b	4	b	45	26	High School	Canada	European Mixed Race	Female	0- Exclusively heterosexual with no homosexual	43
1170	Condition 1	4b	4	b	50	26	Undergraduate University Degree	Italy	Southern European	Female	0- Exclusively heterosexual with no homosexual	43
109	Condition 1	4b	4	b	55	26	Doctorate/PhD	China	Chinese Asian	Female	0- Exclusively heterosexual with no homosexual	43
1732	Condition 1	4b	4	b	45	25	Post Graduate University Degree	Brazil	South Eastern and Eastern European	Female	0- Exclusively heterosexual with no homosexual	43
1908	Condition 1	4b	4	b	50	25	Post Graduate University Degree	United States	European Mixed Race	Female	0- Exclusively heterosexual with no homosexual	43
1995	Condition 1	4b	4	b	75	25	Undergraduate University Degree	United States	None of these define my ethnic group	Female	0- Exclusively heterosexual with no homosexual	43
439	Condition 1	4b	4	b	40	24	Undergraduate University Degree	Taiwan	Chinese Asian	Female	0- Exclusively heterosexual with no homosexual	43
600	Condition 1	4b	4	b	60	24	Post Graduate University Degree	Other - Asia	None of these define my ethnic group	Female	0- Exclusively heterosexual with no homosexual	43
1854	Condition 1	4b	4	b	60	24	High School	United Kingdom	North Western European, British or Irish	Female	0- Exclusively heterosexual with no homosexual	43
560	Condition 1	4b	4	b	80	24	Undergraduate University Degree	Other - Middle East	European Mixed Race	Female	0- Exclusively heterosexual with no homosexual	43
1546	Condition 1	4b	4	b	25	23	Undergraduate University Degree	United Kingdom	North Western European, British or Irish	Female	0- Exclusively heterosexual with no homosexual	43
515	Condition 1	4b	4	b	45	23	Undergraduate University Degree	Australia	North Western European, British or Irish	Female	0- Exclusively heterosexual with no homosexual	43
1415	Condition 1	4b	4	b	55	23	Post Graduate University Degree	Italy	European Mixed Race	Female	0- Exclusively heterosexual with no homosexual	43
1312	Condition 1	4b	4	b	60	23	Undergraduate University Degree	Mexico	European Mixed Race	Female	0- Exclusively heterosexual with no homosexual	43
1618	Condition 1	4b	4	b	60	23	Undergraduate University Degree	Greece	South Eastern and Eastern European	Female	0- Exclusively heterosexual with no homosexual	43
959	Condition 1	4b	4	b	60	22	Undergraduate University Degree	Germany	North Western European, British or Irish	Female	0- Exclusively heterosexual with no homosexual	43
878	Condition 1	4b	4	b	70	22	High School	Australia	Mixed Race Australian	Female	0- Exclusively heterosexual with no homosexual	43
146	Condition 1	4b	4	b	50	21	Undergraduate University Degree	Australia	North Western European, British or Irish	Female	0- Exclusively heterosexual with no homosexual	43
376	Condition 1	4b	4	b	55	21	Undergraduate University Degree	United States	European Mixed Race	Female	0- Exclusively heterosexual with no homosexual	43
1280	Condition 1	4b	4	b	55	21	Undergraduate University Degree	United States	European Mixed Race	Female	0- Exclusively heterosexual with no homosexual	43
1623	Condition 1	4b	4	b	55	21	Undergraduate University Degree	Other - Middle East	South East Asian	Female	0- Exclusively heterosexual with no homosexual	43
1791	Condition 1	4b	4	b	60	21	Undergraduate University Degree	United States	North Western European, British or Irish	Female	0- Exclusively heterosexual with no homosexual	43
1647	Condition 1	4b	4	b	65	21	Undergraduate University Degree	United Kingdom	North Western European, British or Irish	Female	0- Exclusively heterosexual with no homosexual	43
1333	Condition 1	4b	4	b	100	21	Undergraduate University Degree	United States	European Mixed Race	Female	0- Exclusively heterosexual with no homosexual	43
1320	Condition 1	4b	4	b	50	20	High School	United States	North Western European, British or Irish	Female	0- Exclusively heterosexual with no homosexual	43
304	Condition 1	4b	4	b	70	20	Undergraduate University Degree	Malaysia	Chinese Asian	Female	0- Exclusively heterosexual with no homosexual	43
212	Condition 1	4b	4	b	70	19	Undergraduate University Degree	Australia	European Mixed Race	Female	0- Exclusively heterosexual with no homosexual	43
1146	Condition 1	4b	4	b	70	19	Undergraduate University Degree	Australia	North Western European, British or Irish	Female	0- Exclusively heterosexual with no homosexual	43
323	Condition 1	4b	4	b	80	19	Undergraduate University Degree	Australia	North Western European, British or Irish	Female	0- Exclusively heterosexual with no homosexual	43
575	Condition 1	4b	4	b	40	18	Diploma	Isreal	South Eastern and Eastern European	Female	0- Exclusively heterosexual with no homosexual	43
1248	Condition 1	4b	4	b	50	18	Undergraduate University Degree	United States	Native American Mixed Race	Female	0- Exclusively heterosexual with no homosexual	43
1292	Condition 1	4b	4	b	50	18	High School	Portugal	Southern European	Female	0- Exclusively heterosexual with no homosexual	43
889	Condition 1	4b	4	b	55	18	High School	Australia	Chinese Asian	Female	0- Exclusively heterosexual with no homosexual	43
1678	Condition 1	4b	4	b	55	18	High School	United States	North Western European, British or Irish	Female	0- Exclusively heterosexual with no homosexual	43
2005	Condition 1	4b	4	b	55	18	High School	Australia	Chinese Asian	Female	0- Exclusively heterosexual with no homosexual	43
316	Condition 1	4b	4	b	70	18	Undergraduate University Degree	Australia	Southern Asian	Female	0- Exclusively heterosexual with no homosexual	43
474	Condition 1	4b	4	b	80	34	Post Graduate University Degree	Germany	North Western European, British or Irish	Female	0- Exclusively heterosexual with no homosexual, 1- Predominantly heterosexual, only incidentally homosexual	43
1570	Condition 1	4b	4	b	55	22	High School	Mexico	Other Asian or Mixed Race Asian	Female	0- Exclusively heterosexual with no homosexual, 1- Predominantly heterosexual, only incidentally homosexual	43
1958	Condition 1	4b	4	b	55	19	High School	United Kingdom	North Western European, British or Irish	Female	0- Exclusively heterosexual with no homosexual, 1- Predominantly heterosexual, only incidentally homosexual	43
1131	Condition 1	4b	4	b	55	34	Undergraduate University Degree	United States	North Western European, British or Irish	Female	1- Predominantly heterosexual, only incidentally homosexual	43
1361	Condition 1	4b	4	b	45	33	Other/Attending college	United States	European Mixed Race	Female	1- Predominantly heterosexual, only incidentally homosexual	43
895	Condition 1	4b	4	b	25	32	Undergraduate University Degree	Spain	Southern European	Female	1- Predominantly heterosexual, only incidentally homosexual	43
1177	Condition 1	4b	4	b	60	31	Post Graduate University Degree	United States	European Mixed Race	Female	1- Predominantly heterosexual, only incidentally homosexual	43
1407	Condition 1	4b	4	b	50	30	Undergraduate University Degree	United States	European Mixed Race	Female	1- Predominantly heterosexual, only incidentally homosexual	43
126	Condition 1	4b	4	b	55	30	Undergraduate University Degree	Australia	European Mixed Race	Female	1- Predominantly heterosexual, only incidentally homosexual	43
506	Condition 1	4b	4	b	60	30	Undergraduate University Degree	Mexico	Central American	Female	1- Predominantly heterosexual, only incidentally homosexual	43
808	Condition 1	4b	4	b	50	29	Post Graduate University Degree	France	Southern European	Female	1- Predominantly heterosexual, only incidentally homosexual	43
72	Condition 1	4b	4	b	65	29	Post Graduate University Degree	Australia	Mixed Race Australian	Female	1- Predominantly heterosexual, only incidentally homosexual	43
931	Condition 1	4b	4	b	70	29	Post Graduate University Degree	Australia	North Western European, British or Irish	Female	1- Predominantly heterosexual, only incidentally homosexual	43
1271	Condition 1	4b	4	b	50	28	Undergraduate University Degree	United States	None of these define my ethnic group	Female	1- Predominantly heterosexual, only incidentally homosexual	43
23	Condition 1	4b	4	b	65	28	Undergraduate University Degree	Australia	Other Asian or Mixed Race Asian	Female	1- Predominantly heterosexual, only incidentally homosexual	43
1382	Condition 1	4b	4	b	30	27	High School	United States	European Mixed Race	Female	1- Predominantly heterosexual, only incidentally homosexual	43
61	Condition 1	4b	4	b	50	27	Undergraduate University Degree	Australia	North Western European, British or Irish	Female	1- Predominantly heterosexual, only incidentally homosexual	43
441	Condition 1	4b	4	b	60	27	Undergraduate University Degree	United Kingdom	North Western European, British or Irish	Female	1- Predominantly heterosexual, only incidentally homosexual	43
1624	Condition 1	4b	4	b	85	27	Post Graduate University Degree	Chile	European Mixed Race	Female	1- Predominantly heterosexual, only incidentally homosexual	43
324	Condition 1	4b	4	b	45	26	Undergraduate University Degree	United Kingdom	North Western European, British or Irish	Female	1- Predominantly heterosexual, only incidentally homosexual	43
1649	Condition 1	4b	4	b	65	26	Undergraduate University Degree	Australia	New Zealand Peoples	Female	1- Predominantly heterosexual, only incidentally homosexual	43
2007	Condition 1	4b	4	b	60	25	Undergraduate University Degree	Canada	North Western European, British or Irish	Female	1- Predominantly heterosexual, only incidentally homosexual	43
1740	Condition 1	4b	4	b	60	24	High School	United States	Southern European	Female	1- Predominantly heterosexual, only incidentally homosexual	43
1780	Condition 1	4b	4	b	80	24	Undergraduate University Degree	United States	Chinese Asian	Female	1- Predominantly heterosexual, only incidentally homosexual	43
413	Condition 1	4b	4	b	40	23	Diploma	United States	European Mixed Race	Female	1- Predominantly heterosexual, only incidentally homosexual	43
1478	Condition 1	4b	4	b	40	23	Undergraduate University Degree	United States	European Mixed Race	Female	1- Predominantly heterosexual, only incidentally homosexual	43
263	Condition 1	4b	4	b	50	23	Undergraduate University Degree	Australia	North Western European, British or Irish	Female	1- Predominantly heterosexual, only incidentally homosexual	43
768	Condition 1	4b	4	b	50	23	Diploma	United States	Native American Mixed Race	Female	1- Predominantly heterosexual, only incidentally homosexual	43
735	Condition 1	4b	4	b	55	23	Undergraduate University Degree	Germany	North Western European, British or Irish	Female	1- Predominantly heterosexual, only incidentally homosexual	43
289	Condition 1	4b	4	b	60	23	Undergraduate University Degree	Australia	South East Asian	Female	1- Predominantly heterosexual, only incidentally homosexual	43
276	Condition 1	4b	4	b	40	22	Undergraduate University Degree	Australia	Chinese Asian	Female	1- Predominantly heterosexual, only incidentally homosexual	43
17	Condition 1	4b	4	b	70	22	Post Graduate University Degree	South Africa	North Western European, British or Irish	Female	1- Predominantly heterosexual, only incidentally homosexual	43
732	Condition 1	4b	4	b	90	22	Undergraduate University Degree	United Kingdom	North Western European, British or Irish	Female	1- Predominantly heterosexual, only incidentally homosexual	43
239	Condition 1	4b	4	b	60	21	Undergraduate University Degree	Australia	European Mixed Race	Female	1- Predominantly heterosexual, only incidentally homosexual	43
820	Condition 1	4b	4	b	60	21	Diploma	Other - East European	South Eastern and Eastern European	Female	1- Predominantly heterosexual, only incidentally homosexual	43
228	Condition 1	4b	4	b	75	21	Undergraduate University Degree	Australia	North Western European, British or Irish	Female	1- Predominantly heterosexual, only incidentally homosexual	43
1044	Condition 1	4b	4	b	75	21	Undergraduate University Degree	Australia	Mixed Race Australian	Female	1- Predominantly heterosexual, only incidentally homosexual	43
452	Condition 1	4b	4	b	45	20	High School	Other - East European	South Eastern and Eastern European	Female	1- Predominantly heterosexual, only incidentally homosexual	43
1311	Condition 1	4b	4	b	55	20	Undergraduate University Degree	United States	None of these define my ethnic group	Female	1- Predominantly heterosexual, only incidentally homosexual	43
1639	Condition 1	4b	4	b	60	20	Undergraduate University Degree	United States	European Mixed Race	Female	1- Predominantly heterosexual, only incidentally homosexual	43
1809	Condition 1	4b	4	b	65	20	Diploma	New Zealand	New Zealand Peoples	Female	1- Predominantly heterosexual, only incidentally homosexual	43
1439	Condition 1	4b	4	b	70	20	Undergraduate University Degree	United Kingdom	North Western European, British or Irish	Female	1- Predominantly heterosexual, only incidentally homosexual	43
1664	Condition 1	4b	4	b	70	20	High School	United States	Central American	Female	1- Predominantly heterosexual, only incidentally homosexual	43
1701	Condition 1	4b	4	b	55	19	Undergraduate University Degree	United Kingdom	North Western European, British or Irish	Female	1- Predominantly heterosexual, only incidentally homosexual	43
353	Condition 1	4b	4	b	30	18	High School	Other - Southern Europe	South Eastern and Eastern European	Female	1- Predominantly heterosexual, only incidentally homosexual	43
1802	Condition 1	4b	4	b	35	18	High School	Canada	North Western European, British or Irish	Female	1- Predominantly heterosexual, only incidentally homosexual	43
470	Condition 1	4b	4	b	55	36	Doctorate/PhD	United States	South East Asian	Female	2- Predominantly heterosexual, but more than incidentally homosexual	43
1946	Condition 1	4b	4	b	50	30	Undergraduate University Degree	United States	European Mixed Race	Female	2- Predominantly heterosexual, but more than incidentally homosexual	43
1348	Condition 1	4b	4	b	65	30	Undergraduate University Degree	United States	North Western European, British or Irish	Female	2- Predominantly heterosexual, but more than incidentally homosexual	43
1493	Condition 1	4b	4	b	65	29	High School	Mexico	Other Central or South American or Mixed Race	Female	2- Predominantly heterosexual, but more than incidentally homosexual	43
1324	Condition 1	4b	4	b	60	28	Undergraduate University Degree	United States	North Western European, British or Irish	Female	2- Predominantly heterosexual, but more than incidentally homosexual	43
1879	Condition 1	4b	4	b	65	26	Undergraduate University Degree	United States	North Western European, British or Irish	Female	2- Predominantly heterosexual, but more than incidentally homosexual	43
221	Condition 1	4b	4	b	35	24	Undergraduate University Degree	Australia	Mixed Race Australian	Female	2- Predominantly heterosexual, but more than incidentally homosexual	43
235	Condition 1	4b	4	b	75	24	Undergraduate University Degree	Australia	Chinese Asian	Female	2- Predominantly heterosexual, but more than incidentally homosexual	43
535	Condition 1	4b	4	b	70	23	Undergraduate University Degree	United States	European Mixed Race	Female	2- Predominantly heterosexual, but more than incidentally homosexual	43
1531	Condition 1	4b	4	b	70	23	High School	Netherlands	Southern European	Female	2- Predominantly heterosexual, but more than incidentally homosexual	43
1115	Condition 1	4b	4	b	75	22	Undergraduate University Degree	United States	Southern European	Female	2- Predominantly heterosexual, but more than incidentally homosexual	43
1662	Condition 1	4b	4	b	55	21	Undergraduate University Degree	United States	European Mixed Race	Female	2- Predominantly heterosexual, but more than incidentally homosexual	43
1229	Condition 1	4b	4	b	60	21	High School	New Zealand	European Mixed Race	Female	2- Predominantly heterosexual, but more than incidentally homosexual	43
1130	Condition 1	4b	4	b	85	21	Diploma	Germany	North Western European, British or Irish	Female	2- Predominantly heterosexual, but more than incidentally homosexual	43
230	Condition 1	4b	4	b	50	20	Undergraduate University Degree	Australia	Mixed Race Australian	Female	2- Predominantly heterosexual, but more than incidentally homosexual	43
461	Condition 1	4b	4	b	55	20	High School	Australia	North Western European, British or Irish	Female	2- Predominantly heterosexual, but more than incidentally homosexual	43
489	Condition 1	4b	4	b	35	19	Undergraduate University Degree	Australia	South Eastern and Eastern European	Female	2- Predominantly heterosexual, but more than incidentally homosexual	43
1400	Condition 1	4b	4	b	70	18	High School	Chile	European Mixed Race	Female	2- Predominantly heterosexual, but more than incidentally homosexual	43
703	Condition 1	4b	4	b	55	40	Diploma	United States	None of these define my ethnic group	Female	3- Equally heterosexual and homosexual	43
395	Condition 1	4b	4	b	75	33	Post Graduate University Degree	United States	None of these define my ethnic group	Female	3- Equally heterosexual and homosexual	43
583	Condition 1	4b	4	b	50	26	Post Graduate University Degree	United Kingdom	European Mixed Race	Female	3- Equally heterosexual and homosexual	43
696	Condition 1	4b	4	b	65	26	High School	United States	North Western European, British or Irish	Female	3- Equally heterosexual and homosexual	43
1240	Condition 1	4b	4	b	65	24	Diploma	Canada	North Western European, British or Irish	Female	3- Equally heterosexual and homosexual	43
41	Condition 1	4b	4	b	40	23	Other/College	Australia	North Western European, British or Irish	Female	3- Equally heterosexual and homosexual	43
43	Condition 1	4b	4	b	50	22	Undergraduate University Degree	Australia	South East Asian	Female	3- Equally heterosexual and homosexual	43
605	Condition 1	4b	4	b	50	20	Diploma	United States	European Mixed Race	Female	3- Equally heterosexual and homosexual	43
1315	Condition 1	4b	4	b	65	19	Undergraduate University Degree	France	European Mixed Race	Female	3- Equally heterosexual and homosexual	43
1502	Condition 1	4c	4	c	75	49	Undergraduate University Degree	Austria	North Western European, British or Irish	Female	0- Exclusively heterosexual with no homosexual	43
1076	Condition 1	4c	4	c	55	48	Other/College Grad	Canada	North Western European, British or Irish	Female	0- Exclusively heterosexual with no homosexual	43
267	Condition 1	4c	4	c	70	47	Post Graduate University Degree	Australia	North Western European, British or Irish	Female	0- Exclusively heterosexual with no homosexual	43
122	Condition 1	4c	4	c	45	46	Undergraduate University Degree	Australia	None of these define my ethnic group	Female	0- Exclusively heterosexual with no homosexual	43
1399	Condition 1	4c	4	c	50	45	Undergraduate University Degree	United States	North Western European, British or Irish	Female	0- Exclusively heterosexual with no homosexual	43
579	Condition 1	4c	4	c	60	45	Undergraduate University Degree	United States	North Western European, British or Irish	Female	0- Exclusively heterosexual with no homosexual	43
28	Condition 1	4c	4	c	80	37	Post Graduate University Degree	Australia	North Western European, British or Irish	Female	0- Exclusively heterosexual with no homosexual	43
1129	Condition 1	4c	4	c	55	36	Undergraduate University Degree	United States	None of these define my ethnic group	Female	0- Exclusively heterosexual with no homosexual	43
1834	Condition 1	4c	4	c	60	36	Post Graduate University Degree	United Arab Emirates	South American	Female	0- Exclusively heterosexual with no homosexual	43
1887	Condition 1	4c	4	c	75	33	Doctorate/PhD	Portugal	European Mixed Race	Female	0- Exclusively heterosexual with no homosexual	43
1349	Condition 1	4c	4	c	45	31	Undergraduate University Degree	Germany	North Western European, British or Irish	Female	0- Exclusively heterosexual with no homosexual	43
124	Condition 1	4c	4	c	55	31	Undergraduate University Degree	Australia	European Mixed Race	Female	0- Exclusively heterosexual with no homosexual	43
963	Condition 1	4c	4	c	75	31	Post Graduate University Degree	United Kingdom	North Western European, British or Irish	Female	0- Exclusively heterosexual with no homosexual	43
923	Condition 1	4c	4	c	85	31	Undergraduate University Degree	Isreal	South American	Female	0- Exclusively heterosexual with no homosexual	43
1984	Condition 1	4c	4	c	50	30	Undergraduate University Degree	Other - Southern America	Central American	Female	0- Exclusively heterosexual with no homosexual	43
1256	Condition 1	4c	4	c	75	30	Post Graduate University Degree	Argentina	South American	Female	0- Exclusively heterosexual with no homosexual	43
1667	Condition 1	4c	4	c	75	30	Doctorate/PhD	Australia	North Western European, British or Irish	Female	0- Exclusively heterosexual with no homosexual	43
11	Condition 1	4c	4	c	60	29	Post Graduate University Degree	United States	Native North American or First Nation	Female	0- Exclusively heterosexual with no homosexual	43
708	Condition 1	4c	4	c	70	29	Undergraduate University Degree	United States	European Mixed Race	Female	0- Exclusively heterosexual with no homosexual	43
12	Condition 1	4c	4	c	45	28	Undergraduate University Degree	United States	North Western European, British or Irish	Female	0- Exclusively heterosexual with no homosexual	43
587	Condition 1	4c	4	c	50	28	Post Graduate University Degree	Australia	North Western European, British or Irish	Female	0- Exclusively heterosexual with no homosexual	43
556	Condition 1	4c	4	c	60	28	Doctorate/PhD	United States	Other Central or South American or Mixed Race	Female	0- Exclusively heterosexual with no homosexual	43
935	Condition 1	4c	4	c	85	28	Undergraduate University Degree	Poland	South Eastern and Eastern European	Female	0- Exclusively heterosexual with no homosexual	43
1543	Condition 1	4c	4	c	65	27	Doctorate/PhD	Germany	South American	Female	0- Exclusively heterosexual with no homosexual	43
1072	Condition 1	4c	4	c	80	27	Diploma	Portugal	None of these define my ethnic group	Female	0- Exclusively heterosexual with no homosexual	43
1365	Condition 1	4c	4	c	50	26	Doctorate/PhD	United States	European Mixed Race	Female	0- Exclusively heterosexual with no homosexual	43
137	Condition 1	4c	4	c	75	26	Diploma	Australia	Mixed Race Australian	Female	0- Exclusively heterosexual with no homosexual	43
827	Condition 1	4c	4	c	90	26	Diploma	United States	None of these define my ethnic group	Female	0- Exclusively heterosexual with no homosexual	43
672	Condition 1	4c	4	c	40	25	Post Graduate University Degree	India	South East Asian	Female	0- Exclusively heterosexual with no homosexual	43
900	Condition 1	4c	4	c	40	25	Diploma	United Kingdom	None of these define my ethnic group	Female	0- Exclusively heterosexual with no homosexual	43
1159	Condition 1	4c	4	c	50	25	Undergraduate University Degree	United States	South American	Female	0- Exclusively heterosexual with no homosexual	43
890	Condition 1	4c	4	c	50	24	Post Graduate University Degree	Spain	Southern European	Female	0- Exclusively heterosexual with no homosexual	43
866	Condition 1	4c	4	c	60	24	Post Graduate University Degree	United Kingdom	European Mixed Race	Female	0- Exclusively heterosexual with no homosexual	43
476	Condition 1	4c	4	c	70	24	Undergraduate University Degree	United States	European Mixed Race	Female	0- Exclusively heterosexual with no homosexual	43
1891	Condition 1	4c	4	c	45	23	Undergraduate University Degree	Canada	North Western European, British or Irish	Female	0- Exclusively heterosexual with no homosexual	43
925	Condition 1	4c	4	c	50	23	Undergraduate University Degree	Portugal	Southern European	Female	0- Exclusively heterosexual with no homosexual	43
1389	Condition 1	4c	4	c	60	23	Post Graduate University Degree	Germany	Southern European	Female	0- Exclusively heterosexual with no homosexual	43
391	Condition 1	4c	4	c	65	23	Undergraduate University Degree	Canada	North Western European, British or Irish	Female	0- Exclusively heterosexual with no homosexual	43
414	Condition 1	4c	4	c	30	22	Undergraduate University Degree	Other - East European	South Eastern and Eastern European	Female	0- Exclusively heterosexual with no homosexual	43
2011	Condition 1	4c	4	c	45	22	Undergraduate University Degree	United States	North Western European, British or Irish	Female	0- Exclusively heterosexual with no homosexual	43
497	Condition 1	4c	4	c	65	22	Diploma	United States	Central American	Female	0- Exclusively heterosexual with no homosexual	43
953	Condition 1	4c	4	c	65	22	Undergraduate University Degree	Italy	European Mixed Race	Female	0- Exclusively heterosexual with no homosexual	43
876	Condition 1	4c	4	c	75	22	Diploma	Italy	Southern European	Female	0- Exclusively heterosexual with no homosexual	43
1903	Condition 1	4c	4	c	40	21	Diploma	United States	North Western European, British or Irish	Female	0- Exclusively heterosexual with no homosexual	43
370	Condition 1	4c	4	c	60	21	High School	Australia	North Western European, British or Irish	Female	0- Exclusively heterosexual with no homosexual	43
527	Condition 1	4c	4	c	90	21	Undergraduate University Degree	United States	European Mixed Race	Female	0- Exclusively heterosexual with no homosexual	43
1606	Condition 1	4c	4	c	45	20	High School	United States	European Mixed Race	Female	0- Exclusively heterosexual with no homosexual	43
1489	Condition 1	4c	4	c	85	20	Undergraduate University Degree	United States	North Western European, British or Irish	Female	0- Exclusively heterosexual with no homosexual	43
363	Condition 1	4c	4	c	30	19	High School	Australia	Other North-East Asian	Female	0- Exclusively heterosexual with no homosexual	43
1910	Condition 1	4c	4	c	40	19	Diploma	Netherlands	South Eastern and Eastern European	Female	0- Exclusively heterosexual with no homosexual	43
293	Condition 1	4c	4	c	45	19	Undergraduate University Degree	Australia	Chinese Asian	Female	0- Exclusively heterosexual with no homosexual	43
396	Condition 1	4c	4	c	50	19	Diploma	United States	European Mixed Race	Female	0- Exclusively heterosexual with no homosexual	43
933	Condition 1	4c	4	c	60	19	High School	United States	European Mixed Race	Female	0- Exclusively heterosexual with no homosexual	43
1027	Condition 1	4c	4	c	80	19	Undergraduate University Degree	South Africa	North Western European, British or Irish	Female	0- Exclusively heterosexual with no homosexual	43
1943	Condition 1	4c	4	c	40	18	High School	United States	North Western European, British or Irish	Female	0- Exclusively heterosexual with no homosexual	43
80	Condition 1	4c	4	c	55	18	Undergraduate University Degree	Australia	None of these define my ethnic group	Female	0- Exclusively heterosexual with no homosexual	43
1092	Condition 1	4c	4	c	55	18	Undergraduate University Degree	Portugal	Southern European	Female	0- Exclusively heterosexual with no homosexual	43
649	Condition 1	4c	4	c	60	18	High School	Australia	North Western European, British or Irish	Female	0- Exclusively heterosexual with no homosexual	43
1302	Condition 1	4c	4	c	60	18	High School	Australia	European Mixed Race	Female	0- Exclusively heterosexual with no homosexual	43
226	Condition 1	4c	4	c	65	18	Undergraduate University Degree	Australia	South Eastern and Eastern European	Female	0- Exclusively heterosexual with no homosexual	43
151	Condition 1	4c	4	c	80	18	Undergraduate University Degree	Australia	Southern Asian	Female	0- Exclusively heterosexual with no homosexual	43
1825	Condition 1	4c	4	c	50	22	Undergraduate University Degree	United States	European Mixed Race	Female	0- Exclusively heterosexual with no homosexual, 1- Predominantly heterosexual, only incidentally homosexual, 2- Predominantly heterosexual, but more than incidentally homosexual, 3- Equally heterosexual and homosexual, 4- Predominantly homosexual, but more than incidentally heterosexual, 5- Predominantly homosexual, only incidentally heterosexual, 6- Exclusively homosexual	43
1141	Condition 1	4c	4	c	45	47	Undergraduate University Degree	United States	North Western European, British or Irish	Female	1- Predominantly heterosexual, only incidentally homosexual	43
1512	Condition 1	4c	4	c	65	45	Undergraduate University Degree	United States	North Western European, British or Irish	Female	1- Predominantly heterosexual, only incidentally homosexual	43
899	Condition 1	4c	4	c	80	45	Post Graduate University Degree	Australia	North Western European, British or Irish	Female	1- Predominantly heterosexual, only incidentally homosexual	43
1142	Condition 1	4c	4	c	50	41	Undergraduate University Degree	United States	None of these define my ethnic group	Female	1- Predominantly heterosexual, only incidentally homosexual	43
261	Condition 1	4c	4	c	70	40	Post Graduate University Degree	Australia	North Western European, British or Irish	Female	1- Predominantly heterosexual, only incidentally homosexual	43
1747	Condition 1	4c	4	c	80	38	Undergraduate University Degree	United States	South Eastern and Eastern European	Female	1- Predominantly heterosexual, only incidentally homosexual	43
865	Condition 1	4c	4	c	55	36	Undergraduate University Degree	Denmark	European Mixed Race	Female	1- Predominantly heterosexual, only incidentally homosexual	43
1441	Condition 1	4c	4	c	55	36	Undergraduate University Degree	Canada	Caribbean Islander	Female	1- Predominantly heterosexual, only incidentally homosexual	43
379	Condition 1	4c	4	c	60	33	High School	Argentina	South American	Female	1- Predominantly heterosexual, only incidentally homosexual	43
728	Condition 1	4c	4	c	30	32	Doctorate/PhD	Germany	North Western European, British or Irish	Female	1- Predominantly heterosexual, only incidentally homosexual	43
1127	Condition 1	4c	4	c	50	32	Undergraduate University Degree	United States	None of these define my ethnic group	Female	1- Predominantly heterosexual, only incidentally homosexual	43
622	Condition 1	4c	4	c	70	31	Post Graduate University Degree	Other - East European	North Western European, British or Irish	Female	1- Predominantly heterosexual, only incidentally homosexual	43
970	Condition 1	4c	4	c	80	31	High School	Isreal	North African or Middle Eastern Jewish	Female	1- Predominantly heterosexual, only incidentally homosexual	43
689	Condition 1	4c	4	c	85	31	Undergraduate University Degree	Australia	North Western European, British or Irish	Female	1- Predominantly heterosexual, only incidentally homosexual	43
1290	Condition 1	4c	4	c	50	30	Other/Trade School	United States	South Eastern and Eastern European	Female	1- Predominantly heterosexual, only incidentally homosexual	43
1150	Condition 1	4c	4	c	60	30	Diploma	United States	North Western European, British or Irish	Female	1- Predominantly heterosexual, only incidentally homosexual	43
736	Condition 1	4c	4	c	95	30	Undergraduate University Degree	United States	North Western European, British or Irish	Female	1- Predominantly heterosexual, only incidentally homosexual	43
1158	Condition 1	4c	4	c	45	29	Post Graduate University Degree	United States	None of these define my ethnic group	Female	1- Predominantly heterosexual, only incidentally homosexual	43
1581	Condition 1	4c	4	c	45	29	Undergraduate University Degree	Ireland	European Mixed Race	Female	1- Predominantly heterosexual, only incidentally homosexual	43
612	Condition 1	4c	4	c	70	29	Diploma	Germany	South Eastern and Eastern European	Female	1- Predominantly heterosexual, only incidentally homosexual	43
1642	Condition 1	4c	4	c	70	27	High School	Austria	European Mixed Race	Female	1- Predominantly heterosexual, only incidentally homosexual	43
1355	Condition 1	4c	4	c	80	27	Undergraduate University Degree	United States	None of these define my ethnic group	Female	1- Predominantly heterosexual, only incidentally homosexual	43
731	Condition 1	4c	4	c	60	26	Undergraduate University Degree	Italy	North Western European, British or Irish	Female	1- Predominantly heterosexual, only incidentally homosexual	43
1261	Condition 1	4c	4	c	55	25	Undergraduate University Degree	United States	North Western European, British or Irish	Female	1- Predominantly heterosexual, only incidentally homosexual	43
1253	Condition 1	4c	4	c	65	25	Diploma	United States	None of these define my ethnic group	Female	1- Predominantly heterosexual, only incidentally homosexual	43
393	Condition 1	4c	4	c	75	25	Undergraduate University Degree	Brazil	Other Central or South American or Mixed Race	Female	1- Predominantly heterosexual, only incidentally homosexual	43
1020	Condition 1	4c	4	c	30	24	Post Graduate University Degree	Netherlands	European Mixed Race	Female	1- Predominantly heterosexual, only incidentally homosexual	43
311	Condition 1	4c	4	c	50	24	Undergraduate University Degree	Australia	North Western European, British or Irish	Female	1- Predominantly heterosexual, only incidentally homosexual	43
1252	Condition 1	4c	4	c	60	24	Undergraduate University Degree	Canada	North Western European, British or Irish	Female	1- Predominantly heterosexual, only incidentally homosexual	43
1497	Condition 1	4c	4	c	50	23	Undergraduate University Degree	United States	European Mixed Race	Female	1- Predominantly heterosexual, only incidentally homosexual	43
1139	Condition 1	4c	4	c	55	23	Undergraduate University Degree	United Kingdom	North Western European, British or Irish	Female	1- Predominantly heterosexual, only incidentally homosexual	43
1889	Condition 1	4c	4	c	55	23	Doctorate/PhD	United States	Southern Asian	Female	1- Predominantly heterosexual, only incidentally homosexual	43
20	Condition 1	4c	4	c	60	23	Undergraduate University Degree	Australia	South East Asian	Female	1- Predominantly heterosexual, only incidentally homosexual	43
134	Condition 1	4c	4	c	60	23	High School	Australia	North Western European, British or Irish	Female	1- Predominantly heterosexual, only incidentally homosexual	43
113	Condition 1	4c	4	c	70	22	Undergraduate University Degree	Australia	North Western European, British or Irish	Female	1- Predominantly heterosexual, only incidentally homosexual	43
1411	Condition 1	4c	4	c	75	22	Undergraduate University Degree	United States	North Western European, British or Irish	Female	1- Predominantly heterosexual, only incidentally homosexual	43
1999	Condition 1	4c	4	c	50	21	High School	Canada	None of these define my ethnic group	Female	1- Predominantly heterosexual, only incidentally homosexual	43
211	Condition 1	4c	4	c	75	21	Undergraduate University Degree	Australia	Chinese Asian	Female	1- Predominantly heterosexual, only incidentally homosexual	43
160	Condition 1	4c	4	c	50	20	Undergraduate University Degree	Australia	Chinese Asian	Female	1- Predominantly heterosexual, only incidentally homosexual	43
1055	Condition 1	4c	4	c	50	20	High School	Ireland	North Western European, British or Irish	Female	1- Predominantly heterosexual, only incidentally homosexual	43
722	Condition 1	4c	4	c	60	20	High School	Czech Republic	South Eastern and Eastern European	Female	1- Predominantly heterosexual, only incidentally homosexual	43
656	Condition 1	4c	4	c	70	20	High School	Czech Republic	European Mixed Race	Female	1- Predominantly heterosexual, only incidentally homosexual	43
448	Condition 1	4c	4	c	30	19	Undergraduate University Degree	United States	Native North American or First Nation	Female	1- Predominantly heterosexual, only incidentally homosexual	43
749	Condition 1	4c	4	c	60	19	High School	United Kingdom	North Western European, British or Irish	Female	1- Predominantly heterosexual, only incidentally homosexual	43
1764	Condition 1	4c	4	c	45	18	High School	Other - East European	South Eastern and Eastern European	Female	1- Predominantly heterosexual, only incidentally homosexual	43
738	Condition 1	4c	4	c	75	18	High School	United Kingdom	North Western European, British or Irish	Female	1- Predominantly heterosexual, only incidentally homosexual	43
1562	Condition 1	4c	4	c	80	18	High School	Germany	Southern European	Female	1- Predominantly heterosexual, only incidentally homosexual	43
477	Condition 1	4c	4	c	40	38	Undergraduate University Degree	United States	North Western European, British or Irish	Female	2- Predominantly heterosexual, but more than incidentally homosexual	43
1358	Condition 1	4c	4	c	70	36	High School	United States	European Mixed Race	Female	2- Predominantly heterosexual, but more than incidentally homosexual	43
1098	Condition 1	4c	4	c	70	34	Undergraduate University Degree	United States	European Mixed Race	Female	2- Predominantly heterosexual, but more than incidentally homosexual	43
1096	Condition 1	4c	4	c	50	31	Post Graduate University Degree	Portugal	Southern European	Female	2- Predominantly heterosexual, but more than incidentally homosexual	43
407	Condition 1	4c	4	c	70	26	Undergraduate University Degree	Finland	North Western European, British or Irish	Female	2- Predominantly heterosexual, but more than incidentally homosexual	43
1122	Condition 1	4c	4	c	65	25	Undergraduate University Degree	United States	European Mixed Race	Female	2- Predominantly heterosexual, but more than incidentally homosexual	43
147	Condition 1	4c	4	c	65	24	Undergraduate University Degree	Australia	North Western European, British or Irish	Female	2- Predominantly heterosexual, but more than incidentally homosexual	43
1247	Condition 1	4c	4	c	40	23	High School	Sweden	North Western European, British or Irish	Female	2- Predominantly heterosexual, but more than incidentally homosexual	43
1024	Condition 1	4c	4	c	45	23	Undergraduate University Degree	United States	North Western European, British or Irish	Female	2- Predominantly heterosexual, but more than incidentally homosexual	43
1377	Condition 1	4c	4	c	60	23	Post Graduate University Degree	United States	European Mixed Race	Female	2- Predominantly heterosexual, but more than incidentally homosexual	43
1646	Condition 1	4c	4	c	40	22	Diploma	United States	Southern Asian	Female	2- Predominantly heterosexual, but more than incidentally homosexual	43
1277	Condition 1	4c	4	c	40	21	High School	United States	North Western European, British or Irish	Female	2- Predominantly heterosexual, but more than incidentally homosexual	43
404	Condition 1	4c	4	c	60	20	High School	United States	None of these define my ethnic group	Female	2- Predominantly heterosexual, but more than incidentally homosexual	43
511	Condition 1	4c	4	c	70	20	Undergraduate University Degree	United States	North Western European, British or Irish	Female	2- Predominantly heterosexual, but more than incidentally homosexual	43
1175	Condition 1	4c	4	c	75	20	High School	United States	None of these define my ethnic group	Female	2- Predominantly heterosexual, but more than incidentally homosexual	43
466	Condition 1	4c	4	c	45	19	High School	Australia	North Western European, British or Irish	Female	2- Predominantly heterosexual, but more than incidentally homosexual	43
1300	Condition 1	4c	4	c	45	19	Diploma	Switzerland	Other Asian or Mixed Race Asian	Female	2- Predominantly heterosexual, but more than incidentally homosexual	43
1863	Condition 1	4c	4	c	35	37	Post Graduate University Degree	United States	South Eastern and Eastern European	Female	3- Equally heterosexual and homosexual	43
1206	Condition 1	4c	4	c	75	35	Post Graduate University Degree	United States	None of these define my ethnic group	Female	3- Equally heterosexual and homosexual	43
1264	Condition 1	4c	4	c	70	30	Other/Two Associate's Degrees, 6 credits away from a Bachelor's Degree	United States	European Mixed Race	Female	3- Equally heterosexual and homosexual	43
977	Condition 1	4c	4	c	60	23	High School	United States	North Western European, British or Irish	Female	3- Equally heterosexual and homosexual	43
1076	Condition 1	5a	5	a	60	48	Other/College Grad	Canada	North Western European, British or Irish	Female	0- Exclusively heterosexual with no homosexual	29
122	Condition 1	5a	5	a	40	46	Undergraduate University Degree	Australia	None of these define my ethnic group	Female	0- Exclusively heterosexual with no homosexual	29
268	Condition 1	5a	5	a	75	45	Undergraduate University Degree	Australia	North Western European, British or Irish	Female	0- Exclusively heterosexual with no homosexual	29
579	Condition 1	5a	5	a	80	45	Undergraduate University Degree	United States	North Western European, British or Irish	Female	0- Exclusively heterosexual with no homosexual	29
1480	Condition 1	5a	5	a	50	44	Undergraduate University Degree	United States	North Western European, British or Irish	Female	0- Exclusively heterosexual with no homosexual	29
1929	Condition 1	5a	5	a	85	44	Undergraduate University Degree	United States	European Mixed Race	Female	0- Exclusively heterosexual with no homosexual	29
1201	Condition 1	5a	5	a	90	40	Undergraduate University Degree	Canada	North Western European, British or Irish	Female	0- Exclusively heterosexual with no homosexual	29
1613	Condition 1	5a	5	a	85	39	Diploma	United Kingdom	North Western European, British or Irish	Female	0- Exclusively heterosexual with no homosexual	29
1605	Condition 1	5a	5	a	95	38	Doctorate/PhD	United States	European Mixed Race	Female	0- Exclusively heterosexual with no homosexual	29
352	Condition 1	5a	5	a	65	37	Undergraduate University Degree	United States	North Western European, British or Irish	Female	0- Exclusively heterosexual with no homosexual	29
332	Condition 1	5a	5	a	70	37	High School	Australia	North Western European, British or Irish	Female	0- Exclusively heterosexual with no homosexual	29
1884	Condition 1	5a	5	a	90	37	Undergraduate University Degree	United States	South Eastern and Eastern European	Female	0- Exclusively heterosexual with no homosexual	29
1897	Condition 1	5a	5	a	85	36	Post Graduate University Degree	United States	European Mixed Race	Female	0- Exclusively heterosexual with no homosexual	29
327	Condition 1	5a	5	a	45	34	High School	Belgium	North Western European, British or Irish	Female	0- Exclusively heterosexual with no homosexual	29
1484	Condition 1	5a	5	a	70	33	Other/some college	United States	None of these define my ethnic group	Female	0- Exclusively heterosexual with no homosexual	29
1887	Condition 1	5a	5	a	70	33	Doctorate/PhD	Portugal	European Mixed Race	Female	0- Exclusively heterosexual with no homosexual	29
1669	Condition 1	5a	5	a	80	33	Undergraduate University Degree	Egypt	North African or Middle Eastern Arab	Female	0- Exclusively heterosexual with no homosexual	29
1368	Condition 1	5a	5	a	60	32	Undergraduate University Degree	United States	Central American	Female	0- Exclusively heterosexual with no homosexual	29
571	Condition 1	5a	5	a	80	32	Diploma	Australia	North Western European, British or Irish	Female	0- Exclusively heterosexual with no homosexual	29
963	Condition 1	5a	5	a	65	31	Post Graduate University Degree	United Kingdom	North Western European, British or Irish	Female	0- Exclusively heterosexual with no homosexual	29
1685	Condition 1	5a	5	a	75	31	Post Graduate University Degree	United States	European Mixed Race	Female	0- Exclusively heterosexual with no homosexual	29
968	Condition 1	5a	5	a	70	30	Post Graduate University Degree	Brazil	South American	Female	0- Exclusively heterosexual with no homosexual	29
1431	Condition 1	5a	5	a	70	30	Undergraduate University Degree	Other - East European	South Eastern and Eastern European	Female	0- Exclusively heterosexual with no homosexual	29
1822	Condition 1	5a	5	a	90	30	Undergraduate University Degree	United States	South Eastern and Eastern European	Female	0- Exclusively heterosexual with no homosexual	29
11	Condition 1	5a	5	a	50	29	Post Graduate University Degree	United States	Native North American or First Nation	Female	0- Exclusively heterosexual with no homosexual	29
145	Condition 1	5a	5	a	70	29	Diploma	Australia	Other Asian or Mixed Race Asian	Female	0- Exclusively heterosexual with no homosexual	29
913	Condition 1	5a	5	a	85	29	Undergraduate University Degree	Portugal	Southern European	Female	0- Exclusively heterosexual with no homosexual	29
708	Condition 1	5a	5	a	90	29	Undergraduate University Degree	United States	European Mixed Race	Female	0- Exclusively heterosexual with no homosexual	29
1986	Condition 1	5a	5	a	50	28	Doctorate/PhD	United Kingdom	Southern and East Africa	Female	0- Exclusively heterosexual with no homosexual	29
12	Condition 1	5a	5	a	65	28	Undergraduate University Degree	United States	North Western European, British or Irish	Female	0- Exclusively heterosexual with no homosexual	29
556	Condition 1	5a	5	a	70	28	Doctorate/PhD	United States	Other Central or South American or Mixed Race	Female	0- Exclusively heterosexual with no homosexual	29
1342	Condition 1	5a	5	a	90	28	Post Graduate University Degree	United States	European Mixed Race	Female	0- Exclusively heterosexual with no homosexual	29
1543	Condition 1	5a	5	a	65	27	Doctorate/PhD	Germany	South American	Female	0- Exclusively heterosexual with no homosexual	29
1072	Condition 1	5a	5	a	90	27	Diploma	Portugal	None of these define my ethnic group	Female	0- Exclusively heterosexual with no homosexual	29
137	Condition 1	5a	5	a	80	26	Diploma	Australia	Mixed Race Australian	Female	0- Exclusively heterosexual with no homosexual	29
1908	Condition 1	5a	5	a	55	25	Post Graduate University Degree	United States	European Mixed Race	Female	0- Exclusively heterosexual with no homosexual	29
1159	Condition 1	5a	5	a	75	25	Undergraduate University Degree	United States	South American	Female	0- Exclusively heterosexual with no homosexual	29
1995	Condition 1	5a	5	a	90	25	Undergraduate University Degree	United States	None of these define my ethnic group	Female	0- Exclusively heterosexual with no homosexual	29
600	Condition 1	5a	5	a	60	24	Post Graduate University Degree	Other - Asia	None of these define my ethnic group	Female	0- Exclusively heterosexual with no homosexual	29
560	Condition 1	5a	5	a	90	24	Undergraduate University Degree	Other - Middle East	European Mixed Race	Female	0- Exclusively heterosexual with no homosexual	29
1389	Condition 1	5a	5	a	60	23	Post Graduate University Degree	Germany	Southern European	Female	0- Exclusively heterosexual with no homosexual	29
875	Condition 1	5a	5	a	70	23	Undergraduate University Degree	Australia	South Eastern and Eastern European	Female	0- Exclusively heterosexual with no homosexual	29
1891	Condition 1	5a	5	a	70	23	Undergraduate University Degree	Canada	North Western European, British or Irish	Female	0- Exclusively heterosexual with no homosexual	29
1332	Condition 1	5a	5	a	75	23	Undergraduate University Degree	Germany	European Mixed Race	Female	0- Exclusively heterosexual with no homosexual	29
1415	Condition 1	5a	5	a	75	23	Post Graduate University Degree	Italy	European Mixed Race	Female	0- Exclusively heterosexual with no homosexual	29
1546	Condition 1	5a	5	a	80	23	Undergraduate University Degree	United Kingdom	North Western European, British or Irish	Female	0- Exclusively heterosexual with no homosexual	29
414	Condition 1	5a	5	a	50	22	Undergraduate University Degree	Other - East European	South Eastern and Eastern European	Female	0- Exclusively heterosexual with no homosexual	29
497	Condition 1	5a	5	a	55	22	Diploma	United States	Central American	Female	0- Exclusively heterosexual with no homosexual	29
953	Condition 1	5a	5	a	80	22	Undergraduate University Degree	Italy	European Mixed Race	Female	0- Exclusively heterosexual with no homosexual	29
878	Condition 1	5a	5	a	85	22	High School	Australia	Mixed Race Australian	Female	0- Exclusively heterosexual with no homosexual	29
370	Condition 1	5a	5	a	70	21	High School	Australia	North Western European, British or Irish	Female	0- Exclusively heterosexual with no homosexual	29
983	Condition 1	5a	5	a	75	21	Undergraduate University Degree	United States	European Mixed Race	Female	0- Exclusively heterosexual with no homosexual	29
1333	Condition 1	5a	5	a	80	21	Undergraduate University Degree	United States	European Mixed Race	Female	0- Exclusively heterosexual with no homosexual	29
527	Condition 1	5a	5	a	85	21	Undergraduate University Degree	United States	European Mixed Race	Female	0- Exclusively heterosexual with no homosexual	29
185	Condition 1	5a	5	a	60	20	Undergraduate University Degree	Australia	South East Asian	Female	0- Exclusively heterosexual with no homosexual	29
630	Condition 1	5a	5	a	50	19	Undergraduate University Degree	United Kingdom	North Western European, British or Irish	Female	0- Exclusively heterosexual with no homosexual	29
1027	Condition 1	5a	5	a	60	19	Undergraduate University Degree	South Africa	North Western European, British or Irish	Female	0- Exclusively heterosexual with no homosexual	29
363	Condition 1	5a	5	a	70	19	High School	Australia	Other North-East Asian	Female	0- Exclusively heterosexual with no homosexual	29
1146	Condition 1	5a	5	a	70	19	Undergraduate University Degree	Australia	North Western European, British or Irish	Female	0- Exclusively heterosexual with no homosexual	29
933	Condition 1	5a	5	a	75	19	High School	United States	European Mixed Race	Female	0- Exclusively heterosexual with no homosexual	29
155	Condition 1	5a	5	a	90	19	High School	Australia	North Western European, British or Irish	Female	0- Exclusively heterosexual with no homosexual	29
1248	Condition 1	5a	5	a	55	18	Undergraduate University Degree	United States	Native American Mixed Race	Female	0- Exclusively heterosexual with no homosexual	29
1678	Condition 1	5a	5	a	55	18	High School	United States	North Western European, British or Irish	Female	0- Exclusively heterosexual with no homosexual	29
226	Condition 1	5a	5	a	70	18	Undergraduate University Degree	Australia	South Eastern and Eastern European	Female	0- Exclusively heterosexual with no homosexual	29
1141	Condition 1	5a	5	a	65	47	Undergraduate University Degree	United States	North Western European, British or Irish	Female	1- Predominantly heterosexual, only incidentally homosexual	29
1512	Condition 1	5a	5	a	75	45	Undergraduate University Degree	United States	North Western European, British or Irish	Female	1- Predominantly heterosexual, only incidentally homosexual	29
261	Condition 1	5a	5	a	80	40	Post Graduate University Degree	Australia	North Western European, British or Irish	Female	1- Predominantly heterosexual, only incidentally homosexual	29
1747	Condition 1	5a	5	a	80	38	Undergraduate University Degree	United States	South Eastern and Eastern European	Female	1- Predominantly heterosexual, only incidentally homosexual	29
1971	Condition 1	5a	5	a	60	37	Post Graduate University Degree	United States	South Eastern and Eastern European	Female	1- Predominantly heterosexual, only incidentally homosexual	29
378	Condition 1	5a	5	a	50	36	Post Graduate University Degree	United States	North Western European, British or Irish	Female	1- Predominantly heterosexual, only incidentally homosexual	29
865	Condition 1	5a	5	a	85	36	Undergraduate University Degree	Denmark	European Mixed Race	Female	1- Predominantly heterosexual, only incidentally homosexual	29
1990	Condition 1	5a	5	a	60	33	Other/Associates Degree in Nursing	United States	European Mixed Race	Female	1- Predominantly heterosexual, only incidentally homosexual	29
895	Condition 1	5a	5	a	40	32	Undergraduate University Degree	Spain	Southern European	Female	1- Predominantly heterosexual, only incidentally homosexual	29
728	Condition 1	5a	5	a	60	32	Doctorate/PhD	Germany	North Western European, British or Irish	Female	1- Predominantly heterosexual, only incidentally homosexual	29
1617	Condition 1	5a	5	a	80	32	Diploma	Canada	North Western European, British or Irish	Female	1- Predominantly heterosexual, only incidentally homosexual	29
35	Condition 1	5a	5	a	75	31	High School	United Kingdom	South Eastern and Eastern European	Female	1- Predominantly heterosexual, only incidentally homosexual	29
622	Condition 1	5a	5	a	80	31	Post Graduate University Degree	Other - East European	North Western European, British or Irish	Female	1- Predominantly heterosexual, only incidentally homosexual	29
949	Condition 1	5a	5	a	95	31	Undergraduate University Degree	United States	None of these define my ethnic group	Female	1- Predominantly heterosexual, only incidentally homosexual	29
506	Condition 1	5a	5	a	70	30	Undergraduate University Degree	Mexico	Central American	Female	1- Predominantly heterosexual, only incidentally homosexual	29
736	Condition 1	5a	5	a	80	30	Undergraduate University Degree	United States	North Western European, British or Irish	Female	1- Predominantly heterosexual, only incidentally homosexual	29
1581	Condition 1	5a	5	a	50	29	Undergraduate University Degree	Ireland	European Mixed Race	Female	1- Predominantly heterosexual, only incidentally homosexual	29
931	Condition 1	5a	5	a	65	29	Post Graduate University Degree	Australia	North Western European, British or Irish	Female	1- Predominantly heterosexual, only incidentally homosexual	29
612	Condition 1	5a	5	a	80	29	Diploma	Germany	South Eastern and Eastern European	Female	1- Predominantly heterosexual, only incidentally homosexual	29
1158	Condition 1	5a	5	a	80	29	Post Graduate University Degree	United States	None of these define my ethnic group	Female	1- Predominantly heterosexual, only incidentally homosexual	29
1271	Condition 1	5a	5	a	60	28	Undergraduate University Degree	United States	None of these define my ethnic group	Female	1- Predominantly heterosexual, only incidentally homosexual	29
1642	Condition 1	5a	5	a	40	27	High School	Austria	European Mixed Race	Female	1- Predominantly heterosexual, only incidentally homosexual	29
1382	Condition 1	5a	5	a	60	27	High School	United States	European Mixed Race	Female	1- Predominantly heterosexual, only incidentally homosexual	29
1355	Condition 1	5a	5	a	90	27	Undergraduate University Degree	United States	None of these define my ethnic group	Female	1- Predominantly heterosexual, only incidentally homosexual	29
1649	Condition 1	5a	5	a	55	26	Undergraduate University Degree	Australia	New Zealand Peoples	Female	1- Predominantly heterosexual, only incidentally homosexual	29
324	Condition 1	5a	5	a	65	26	Undergraduate University Degree	United Kingdom	North Western European, British or Irish	Female	1- Predominantly heterosexual, only incidentally homosexual	29
785	Condition 1	5a	5	a	95	25	Undergraduate University Degree	Norway	North Western European, British or Irish	Female	1- Predominantly heterosexual, only incidentally homosexual	29
311	Condition 1	5a	5	a	60	24	Undergraduate University Degree	Australia	North Western European, British or Irish	Female	1- Predominantly heterosexual, only incidentally homosexual	29
1780	Condition 1	5a	5	a	65	24	Undergraduate University Degree	United States	Chinese Asian	Female	1- Predominantly heterosexual, only incidentally homosexual	29
83	Condition 1	5a	5	a	75	24	Undergraduate University Degree	Australia	North Western European, British or Irish	Female	1- Predominantly heterosexual, only incidentally homosexual	29
735	Condition 1	5a	5	a	65	23	Undergraduate University Degree	Germany	North Western European, British or Irish	Female	1- Predominantly heterosexual, only incidentally homosexual	29
1677	Condition 1	5a	5	a	65	23	Other/In college	United States	Other Central or South American or Mixed Race	Female	1- Predominantly heterosexual, only incidentally homosexual	29
1585	Condition 1	5a	5	a	70	23	Post Graduate University Degree	Other - East European	European Mixed Race	Female	1- Predominantly heterosexual, only incidentally homosexual	29
17	Condition 1	5a	5	a	60	22	Post Graduate University Degree	South Africa	North Western European, British or Irish	Female	1- Predominantly heterosexual, only incidentally homosexual	29
756	Condition 1	5a	5	a	75	22	Diploma	United States	North Western European, British or Irish	Female	1- Predominantly heterosexual, only incidentally homosexual	29
113	Condition 1	5a	5	a	90	22	Undergraduate University Degree	Australia	North Western European, British or Irish	Female	1- Predominantly heterosexual, only incidentally homosexual	29
1999	Condition 1	5a	5	a	65	21	High School	Canada	None of these define my ethnic group	Female	1- Predominantly heterosexual, only incidentally homosexual	29
228	Condition 1	5a	5	a	75	21	Undergraduate University Degree	Australia	North Western European, British or Irish	Female	1- Predominantly heterosexual, only incidentally homosexual	29
792	Condition 1	5a	5	a	35	20	High School	United States	North Western European, British or Irish	Female	1- Predominantly heterosexual, only incidentally homosexual	29
213	Condition 1	5a	5	a	40	20	Undergraduate University Degree	Australia	Chinese Asian	Female	1- Predominantly heterosexual, only incidentally homosexual	29
1639	Condition 1	5a	5	a	55	20	Undergraduate University Degree	United States	European Mixed Race	Female	1- Predominantly heterosexual, only incidentally homosexual	29
1809	Condition 1	5a	5	a	55	20	Diploma	New Zealand	New Zealand Peoples	Female	1- Predominantly heterosexual, only incidentally homosexual	29
1055	Condition 1	5a	5	a	70	20	High School	Ireland	North Western European, British or Irish	Female	1- Predominantly heterosexual, only incidentally homosexual	29
576	Condition 1	5a	5	a	60	19	High School	United Kingdom	Chinese Asian	Female	1- Predominantly heterosexual, only incidentally homosexual	29
1956	Condition 1	5a	5	a	60	19	High School	United States	European Mixed Race	Female	1- Predominantly heterosexual, only incidentally homosexual	29
429	Condition 1	5a	5	a	60	18	High School	Mexico	Central American	Female	1- Predominantly heterosexual, only incidentally homosexual	29
353	Condition 1	5a	5	a	75	18	High School	Other - Southern Europe	South Eastern and Eastern European	Female	1- Predominantly heterosexual, only incidentally homosexual	29
1358	Condition 1	5a	5	a	75	36	High School	United States	European Mixed Race	Female	2- Predominantly heterosexual, but more than incidentally homosexual	29
799	Condition 1	5a	5	a	80	32	Undergraduate University Degree	United States	Central American	Female	2- Predominantly heterosexual, but more than incidentally homosexual	29
1230	Condition 1	5a	5	a	80	31	Undergraduate University Degree	United States	European Mixed Race	Female	2- Predominantly heterosexual, but more than incidentally homosexual	29
1096	Condition 1	5a	5	a	85	31	Post Graduate University Degree	Portugal	Southern European	Female	2- Predominantly heterosexual, but more than incidentally homosexual	29
1493	Condition 1	5a	5	a	60	29	High School	Mexico	Other Central or South American or Mixed Race	Female	2- Predominantly heterosexual, but more than incidentally homosexual	29
1324	Condition 1	5a	5	a	80	28	Undergraduate University Degree	United States	North Western European, British or Irish	Female	2- Predominantly heterosexual, but more than incidentally homosexual	29
1589	Condition 1	5a	5	a	60	26	Other/Some college	United States	None of these define my ethnic group	Female	2- Predominantly heterosexual, but more than incidentally homosexual	29
1024	Condition 1	5a	5	a	65	23	Undergraduate University Degree	United States	North Western European, British or Irish	Female	2- Predominantly heterosexual, but more than incidentally homosexual	29
1247	Condition 1	5a	5	a	70	23	High School	Sweden	North Western European, British or Irish	Female	2- Predominantly heterosexual, but more than incidentally homosexual	29
833	Condition 1	5a	5	a	55	22	Undergraduate University Degree	United Kingdom	North Western European, British or Irish	Female	2- Predominantly heterosexual, but more than incidentally homosexual	29
1593	Condition 1	5a	5	a	60	22	Diploma	United States	North Western European, British or Irish	Female	2- Predominantly heterosexual, but more than incidentally homosexual	29
1662	Condition 1	5a	5	a	70	21	Undergraduate University Degree	United States	European Mixed Race	Female	2- Predominantly heterosexual, but more than incidentally homosexual	29
1130	Condition 1	5a	5	a	85	21	Diploma	Germany	North Western European, British or Irish	Female	2- Predominantly heterosexual, but more than incidentally homosexual	29
404	Condition 1	5a	5	a	45	20	High School	United States	None of these define my ethnic group	Female	2- Predominantly heterosexual, but more than incidentally homosexual	29
924	Condition 1	5a	5	a	50	20	Undergraduate University Degree	United Kingdom	North Western European, British or Irish	Female	2- Predominantly heterosexual, but more than incidentally homosexual	29
461	Condition 1	5a	5	a	55	20	High School	Australia	North Western European, British or Irish	Female	2- Predominantly heterosexual, but more than incidentally homosexual	29
1175	Condition 1	5a	5	a	55	20	High School	United States	None of these define my ethnic group	Female	2- Predominantly heterosexual, but more than incidentally homosexual	29
511	Condition 1	5a	5	a	75	20	Undergraduate University Degree	United States	North Western European, British or Irish	Female	2- Predominantly heterosexual, but more than incidentally homosexual	29
1400	Condition 1	5a	5	a	40	18	High School	Chile	European Mixed Race	Female	2- Predominantly heterosexual, but more than incidentally homosexual	29
996	Condition 1	5a	5	a	95	18	High School	Croatia	None of these define my ethnic group	Female	2- Predominantly heterosexual, but more than incidentally homosexual	29
703	Condition 1	5a	5	a	90	40	Diploma	United States	None of these define my ethnic group	Female	3- Equally heterosexual and homosexual	29
1863	Condition 1	5a	5	a	50	37	Post Graduate University Degree	United States	South Eastern and Eastern European	Female	3- Equally heterosexual and homosexual	29
696	Condition 1	5a	5	a	90	26	High School	United States	North Western European, British or Irish	Female	3- Equally heterosexual and homosexual	29
977	Condition 1	5a	5	a	40	23	High School	United States	North Western European, British or Irish	Female	3- Equally heterosexual and homosexual	29
1053	Condition 1	5b	5	b	70	51	Undergraduate University Degree	United States	South Eastern and Eastern European	Female	0- Exclusively heterosexual with no homosexual	29
278	Condition 1	5b	5	b	45	49	Diploma	Australia	Mixed Race Australian	Female	0- Exclusively heterosexual with no homosexual	29
1502	Condition 1	5b	5	b	75	49	Undergraduate University Degree	Austria	North Western European, British or Irish	Female	0- Exclusively heterosexual with no homosexual	29
1245	Condition 1	5b	5	b	100	45	Post Graduate University Degree	United Arab Emirates	Other Central or South American or Mixed Race	Female	0- Exclusively heterosexual with no homosexual	29
1982	Condition 1	5b	5	b	40	40	Post Graduate University Degree	France	Southern European	Female	0- Exclusively heterosexual with no homosexual	29
513	Condition 1	5b	5	b	90	40	High School	Australia	North Western European, British or Irish	Female	0- Exclusively heterosexual with no homosexual	29
28	Condition 1	5b	5	b	85	37	Post Graduate University Degree	Australia	North Western European, British or Irish	Female	0- Exclusively heterosexual with no homosexual	29
639	Condition 1	5b	5	b	60	35	Diploma	United Kingdom	None of these define my ethnic group	Female	0- Exclusively heterosexual with no homosexual	29
1985	Condition 1	5b	5	b	75	35	Undergraduate University Degree	Brazil	Southern European	Female	0- Exclusively heterosexual with no homosexual	29
59	Condition 1	5b	5	b	50	34	Undergraduate University Degree	Australia	Mixed Race Australian	Female	0- Exclusively heterosexual with no homosexual	29
1417	Condition 1	5b	5	b	75	33	Post Graduate University Degree	Other - Southern America	None of these define my ethnic group	Female	0- Exclusively heterosexual with no homosexual	29
927	Condition 1	5b	5	b	50	31	Undergraduate University Degree	United Kingdom	South Eastern and Eastern European	Female	0- Exclusively heterosexual with no homosexual	29
856	Condition 1	5b	5	b	65	31	Doctorate/PhD	Ireland	North Western European, British or Irish	Female	0- Exclusively heterosexual with no homosexual	29
923	Condition 1	5b	5	b	85	31	Undergraduate University Degree	Isreal	South American	Female	0- Exclusively heterosexual with no homosexual	29
684	Condition 1	5b	5	b	40	30	Post Graduate University Degree	United States	North Western European, British or Irish	Female	0- Exclusively heterosexual with no homosexual	29
1984	Condition 1	5b	5	b	65	30	Undergraduate University Degree	Other - Southern America	Central American	Female	0- Exclusively heterosexual with no homosexual	29
1256	Condition 1	5b	5	b	95	30	Post Graduate University Degree	Argentina	South American	Female	0- Exclusively heterosexual with no homosexual	29
1086	Condition 1	5b	5	b	80	29	Undergraduate University Degree	United States	European Mixed Race	Female	0- Exclusively heterosexual with no homosexual	29
8	Condition 1	5b	5	b	60	28	Undergraduate University Degree	Australia	North Western European, British or Irish	Female	0- Exclusively heterosexual with no homosexual	29
314	Condition 1	5b	5	b	65	28	Undergraduate University Degree	Australia	Chinese Asian	Female	0- Exclusively heterosexual with no homosexual	29
935	Condition 1	5b	5	b	65	28	Undergraduate University Degree	Poland	South Eastern and Eastern European	Female	0- Exclusively heterosexual with no homosexual	29
587	Condition 1	5b	5	b	70	28	Post Graduate University Degree	Australia	North Western European, British or Irish	Female	0- Exclusively heterosexual with no homosexual	29
1426	Condition 1	5b	5	b	70	28	Undergraduate University Degree	United States	North Western European, British or Irish	Female	0- Exclusively heterosexual with no homosexual	29
1890	Condition 1	5b	5	b	80	28	Undergraduate University Degree	Malaysia	South East Asian	Female	0- Exclusively heterosexual with no homosexual	29
1872	Condition 1	5b	5	b	60	27	Post Graduate University Degree	Germany	European Mixed Race	Female	0- Exclusively heterosexual with no homosexual	29
606	Condition 1	5b	5	b	70	27	Doctorate/PhD	Greece	South Eastern and Eastern European	Female	0- Exclusively heterosexual with no homosexual	29
632	Condition 1	5b	5	b	85	27	Post Graduate University Degree	France	North Western European, British or Irish	Female	0- Exclusively heterosexual with no homosexual	29
109	Condition 1	5b	5	b	70	26	Doctorate/PhD	China	Chinese Asian	Female	0- Exclusively heterosexual with no homosexual	29
1140	Condition 1	5b	5	b	75	26	Post Graduate University Degree	Chile	South American	Female	0- Exclusively heterosexual with no homosexual	29
1365	Condition 1	5b	5	b	75	26	Doctorate/PhD	United States	European Mixed Race	Female	0- Exclusively heterosexual with no homosexual	29
827	Condition 1	5b	5	b	80	26	Diploma	United States	None of these define my ethnic group	Female	0- Exclusively heterosexual with no homosexual	29
900	Condition 1	5b	5	b	60	25	Diploma	United Kingdom	None of these define my ethnic group	Female	0- Exclusively heterosexual with no homosexual	29
1732	Condition 1	5b	5	b	70	25	Post Graduate University Degree	Brazil	South Eastern and Eastern European	Female	0- Exclusively heterosexual with no homosexual	29
890	Condition 1	5b	5	b	70	24	Post Graduate University Degree	Spain	Southern European	Female	0- Exclusively heterosexual with no homosexual	29
515	Condition 1	5b	5	b	40	23	Undergraduate University Degree	Australia	North Western European, British or Irish	Female	0- Exclusively heterosexual with no homosexual	29
925	Condition 1	5b	5	b	55	23	Undergraduate University Degree	Portugal	Southern European	Female	0- Exclusively heterosexual with no homosexual	29
1618	Condition 1	5b	5	b	65	23	Undergraduate University Degree	Greece	South Eastern and Eastern European	Female	0- Exclusively heterosexual with no homosexual	29
391	Condition 1	5b	5	b	80	23	Undergraduate University Degree	Canada	North Western European, British or Irish	Female	0- Exclusively heterosexual with no homosexual	29
2011	Condition 1	5b	5	b	50	22	Undergraduate University Degree	United States	North Western European, British or Irish	Female	0- Exclusively heterosexual with no homosexual	29
860	Condition 1	5b	5	b	60	22	High School	Sweden	European Mixed Race	Female	0- Exclusively heterosexual with no homosexual	29
1334	Condition 1	5b	5	b	60	22	Undergraduate University Degree	Hungary	South Eastern and Eastern European	Female	0- Exclusively heterosexual with no homosexual	29
959	Condition 1	5b	5	b	70	22	Undergraduate University Degree	Germany	North Western European, British or Irish	Female	0- Exclusively heterosexual with no homosexual	29
876	Condition 1	5b	5	b	90	22	Diploma	Italy	Southern European	Female	0- Exclusively heterosexual with no homosexual	29
1791	Condition 1	5b	5	b	55	21	Undergraduate University Degree	United States	North Western European, British or Irish	Female	0- Exclusively heterosexual with no homosexual	29
1903	Condition 1	5b	5	b	55	21	Diploma	United States	North Western European, British or Irish	Female	0- Exclusively heterosexual with no homosexual	29
1623	Condition 1	5b	5	b	75	21	Undergraduate University Degree	Other - Middle East	South East Asian	Female	0- Exclusively heterosexual with no homosexual	29
376	Condition 1	5b	5	b	80	21	Undergraduate University Degree	United States	European Mixed Race	Female	0- Exclusively heterosexual with no homosexual	29
1280	Condition 1	5b	5	b	80	21	Undergraduate University Degree	United States	European Mixed Race	Female	0- Exclusively heterosexual with no homosexual	29
1491	Condition 1	5b	5	b	40	20	Undergraduate University Degree	Brazil	South American	Female	0- Exclusively heterosexual with no homosexual	29
201	Condition 1	5b	5	b	50	20	Undergraduate University Degree	Australia	North Western European, British or Irish	Female	0- Exclusively heterosexual with no homosexual	29
1606	Condition 1	5b	5	b	55	20	High School	United States	European Mixed Race	Female	0- Exclusively heterosexual with no homosexual	29
814	Condition 1	5b	5	b	60	20	Undergraduate University Degree	Australia	European Mixed Race	Female	0- Exclusively heterosexual with no homosexual	29
1489	Condition 1	5b	5	b	85	20	Undergraduate University Degree	United States	North Western European, British or Irish	Female	0- Exclusively heterosexual with no homosexual	29
203	Condition 1	5b	5	b	40	19	High School	Australia	European Mixed Race	Female	0- Exclusively heterosexual with no homosexual	29
293	Condition 1	5b	5	b	50	19	Undergraduate University Degree	Australia	Chinese Asian	Female	0- Exclusively heterosexual with no homosexual	29
1910	Condition 1	5b	5	b	60	19	Diploma	Netherlands	South Eastern and Eastern European	Female	0- Exclusively heterosexual with no homosexual	29
212	Condition 1	5b	5	b	95	19	Undergraduate University Degree	Australia	European Mixed Race	Female	0- Exclusively heterosexual with no homosexual	29
575	Condition 1	5b	5	b	35	18	Diploma	Isreal	South Eastern and Eastern European	Female	0- Exclusively heterosexual with no homosexual	29
80	Condition 1	5b	5	b	60	18	Undergraduate University Degree	Australia	None of these define my ethnic group	Female	0- Exclusively heterosexual with no homosexual	29
2005	Condition 1	5b	5	b	65	18	High School	Australia	Chinese Asian	Female	0- Exclusively heterosexual with no homosexual	29
1302	Condition 1	5b	5	b	70	18	High School	Australia	European Mixed Race	Female	0- Exclusively heterosexual with no homosexual	29
316	Condition 1	5b	5	b	90	18	Undergraduate University Degree	Australia	Southern Asian	Female	0- Exclusively heterosexual with no homosexual	29
1570	Condition 1	5b	5	b	55	22	High School	Mexico	Other Asian or Mixed Race Asian	Female	0- Exclusively heterosexual with no homosexual, 1- Predominantly heterosexual, only incidentally homosexual	29
899	Condition 1	5b	5	b	65	45	Post Graduate University Degree	Australia	North Western European, British or Irish	Female	1- Predominantly heterosexual, only incidentally homosexual	29
1142	Condition 1	5b	5	b	60	41	Undergraduate University Degree	United States	None of these define my ethnic group	Female	1- Predominantly heterosexual, only incidentally homosexual	29
1131	Condition 1	5b	5	b	85	34	Undergraduate University Degree	United States	North Western European, British or Irish	Female	1- Predominantly heterosexual, only incidentally homosexual	29
379	Condition 1	5b	5	b	85	33	High School	Argentina	South American	Female	1- Predominantly heterosexual, only incidentally homosexual	29
1186	Condition 1	5b	5	b	65	31	Undergraduate University Degree	United States	European Mixed Race	Female	1- Predominantly heterosexual, only incidentally homosexual	29
970	Condition 1	5b	5	b	90	31	High School	Isreal	North African or Middle Eastern Jewish	Female	1- Predominantly heterosexual, only incidentally homosexual	29
1150	Condition 1	5b	5	b	75	30	Diploma	United States	North Western European, British or Irish	Female	1- Predominantly heterosexual, only incidentally homosexual	29
808	Condition 1	5b	5	b	70	29	Post Graduate University Degree	France	Southern European	Female	1- Predominantly heterosexual, only incidentally homosexual	29
72	Condition 1	5b	5	b	80	29	Post Graduate University Degree	Australia	Mixed Race Australian	Female	1- Predominantly heterosexual, only incidentally homosexual	29
23	Condition 1	5b	5	b	90	28	Undergraduate University Degree	Australia	Other Asian or Mixed Race Asian	Female	1- Predominantly heterosexual, only incidentally homosexual	29
61	Condition 1	5b	5	b	55	27	Undergraduate University Degree	Australia	North Western European, British or Irish	Female	1- Predominantly heterosexual, only incidentally homosexual	29
441	Condition 1	5b	5	b	70	27	Undergraduate University Degree	United Kingdom	North Western European, British or Irish	Female	1- Predominantly heterosexual, only incidentally homosexual	29
956	Condition 1	5b	5	b	85	27	Post Graduate University Degree	Netherlands	North Western European, British or Irish	Female	1- Predominantly heterosexual, only incidentally homosexual	29
986	Condition 1	5b	5	b	40	25	Undergraduate University Degree	United States	North African or Middle Eastern Arab	Female	1- Predominantly heterosexual, only incidentally homosexual	29
1253	Condition 1	5b	5	b	80	25	Diploma	United States	None of these define my ethnic group	Female	1- Predominantly heterosexual, only incidentally homosexual	29
1216	Condition 1	5b	5	b	90	25	Undergraduate University Degree	United Kingdom	Southern Asian	Female	1- Predominantly heterosexual, only incidentally homosexual	29
393	Condition 1	5b	5	b	95	25	Undergraduate University Degree	Brazil	Other Central or South American or Mixed Race	Female	1- Predominantly heterosexual, only incidentally homosexual	29
296	Condition 1	5b	5	b	70	24	Post Graduate University Degree	Australia	Mixed Race Australian	Female	1- Predominantly heterosexual, only incidentally homosexual	29
134	Condition 1	5b	5	b	45	23	High School	Australia	North Western European, British or Irish	Female	1- Predominantly heterosexual, only incidentally homosexual	29
1139	Condition 1	5b	5	b	50	23	Undergraduate University Degree	United Kingdom	North Western European, British or Irish	Female	1- Predominantly heterosexual, only incidentally homosexual	29
1478	Condition 1	5b	5	b	50	23	Undergraduate University Degree	United States	European Mixed Race	Female	1- Predominantly heterosexual, only incidentally homosexual	29
263	Condition 1	5b	5	b	55	23	Undergraduate University Degree	Australia	North Western European, British or Irish	Female	1- Predominantly heterosexual, only incidentally homosexual	29
768	Condition 1	5b	5	b	70	23	Diploma	United States	Native American Mixed Race	Female	1- Predominantly heterosexual, only incidentally homosexual	29
297	Condition 1	5b	5	b	85	23	Undergraduate University Degree	Australia	North Western European, British or Irish	Female	1- Predominantly heterosexual, only incidentally homosexual	29
211	Condition 1	5b	5	b	10	21	Undergraduate University Degree	Australia	Chinese Asian	Female	1- Predominantly heterosexual, only incidentally homosexual	29
1734	Condition 1	5b	5	b	85	21	Undergraduate University Degree	Germany	North Western European, British or Irish	Female	1- Predominantly heterosexual, only incidentally homosexual	29
239	Condition 1	5b	5	b	90	21	Undergraduate University Degree	Australia	European Mixed Race	Female	1- Predominantly heterosexual, only incidentally homosexual	29
160	Condition 1	5b	5	b	55	20	Undergraduate University Degree	Australia	Chinese Asian	Female	1- Predominantly heterosexual, only incidentally homosexual	29
1664	Condition 1	5b	5	b	60	20	High School	United States	Central American	Female	1- Predominantly heterosexual, only incidentally homosexual	29
452	Condition 1	5b	5	b	75	20	High School	Other - East European	South Eastern and Eastern European	Female	1- Predominantly heterosexual, only incidentally homosexual	29
1439	Condition 1	5b	5	b	80	20	Undergraduate University Degree	United Kingdom	North Western European, British or Irish	Female	1- Predominantly heterosexual, only incidentally homosexual	29
1802	Condition 1	5b	5	b	65	18	High School	Canada	North Western European, British or Irish	Female	1- Predominantly heterosexual, only incidentally homosexual	29
470	Condition 1	5b	5	b	65	36	Doctorate/PhD	United States	South East Asian	Female	2- Predominantly heterosexual, but more than incidentally homosexual	29
407	Condition 1	5b	5	b	60	26	Undergraduate University Degree	Finland	North Western European, British or Irish	Female	2- Predominantly heterosexual, but more than incidentally homosexual	29
1865	Condition 1	5b	5	b	80	26	Post Graduate University Degree	United Kingdom	South East Asian	Female	2- Predominantly heterosexual, but more than incidentally homosexual	29
1122	Condition 1	5b	5	b	65	25	Undergraduate University Degree	United States	European Mixed Race	Female	2- Predominantly heterosexual, but more than incidentally homosexual	29
147	Condition 1	5b	5	b	70	24	Undergraduate University Degree	Australia	North Western European, British or Irish	Female	2- Predominantly heterosexual, but more than incidentally homosexual	29
1531	Condition 1	5b	5	b	65	23	High School	Netherlands	Southern European	Female	2- Predominantly heterosexual, but more than incidentally homosexual	29
1646	Condition 1	5b	5	b	40	22	Diploma	United States	Southern Asian	Female	2- Predominantly heterosexual, but more than incidentally homosexual	29
230	Condition 1	5b	5	b	55	20	Undergraduate University Degree	Australia	Mixed Race Australian	Female	2- Predominantly heterosexual, but more than incidentally homosexual	29
489	Condition 1	5b	5	b	70	19	Undergraduate University Degree	Australia	South Eastern and Eastern European	Female	2- Predominantly heterosexual, but more than incidentally homosexual	29
1102	Condition 1	5b	5	b	80	37	Doctorate/PhD	United States	South Eastern and Eastern European	Female	3- Equally heterosexual and homosexual	29
1206	Condition 1	5b	5	b	80	35	Post Graduate University Degree	United States	None of these define my ethnic group	Female	3- Equally heterosexual and homosexual	29
418	Condition 1	5b	5	b	65	32	Undergraduate University Degree	United States	European Mixed Race	Female	3- Equally heterosexual and homosexual	29
1264	Condition 1	5b	5	b	90	30	Other/Two Associate's Degrees, 6 credits away from a Bachelor's Degree	United States	European Mixed Race	Female	3- Equally heterosexual and homosexual	29
516	Condition 1	5b	5	b	10	27	Diploma	Serbia	Southern European	Female	3- Equally heterosexual and homosexual	29
1046	Condition 1	5b	5	b	65	26	Other/Technical Training + some college	United States	European Mixed Race	Female	3- Equally heterosexual and homosexual	29
372	Condition 1	5b	5	b	55	25	Post Graduate University Degree	Australia	North Western European, British or Irish	Female	3- Equally heterosexual and homosexual	29
41	Condition 1	5b	5	b	15	23	Other/College	Australia	North Western European, British or Irish	Female	3- Equally heterosexual and homosexual	29
542	Condition 1	5b	5	b	70	23	Other/High school plus coaching certifications	Canada	North Western European, British or Irish	Female	3- Equally heterosexual and homosexual	29
1315	Condition 1	5b	5	b	35	19	Undergraduate University Degree	France	European Mixed Race	Female	3- Equally heterosexual and homosexual	29
267	Condition 1	5c	5	c	70	47	Post Graduate University Degree	Australia	North Western European, British or Irish	Female	0- Exclusively heterosexual with no homosexual	29
1399	Condition 1	5c	5	c	75	45	Undergraduate University Degree	United States	North Western European, British or Irish	Female	0- Exclusively heterosexual with no homosexual	29
1052	Condition 1	5c	5	c	50	42	Other/3 years college	United States	European Mixed Race	Female	0- Exclusively heterosexual with no homosexual	29
309	Condition 1	5c	5	c	35	40	Undergraduate University Degree	Australia	North Western European, British or Irish	Female	0- Exclusively heterosexual with no homosexual	29
830	Condition 1	5c	5	c	80	40	Doctorate/PhD	United States	North Western European, British or Irish	Female	0- Exclusively heterosexual with no homosexual	29
1892	Condition 1	5c	5	c	50	39	Post Graduate University Degree	Other - Southern America	Other Central or South American or Mixed Race	Female	0- Exclusively heterosexual with no homosexual	29
673	Condition 1	5c	5	c	65	38	Post Graduate University Degree	Sweden	North Western European, British or Irish	Female	0- Exclusively heterosexual with no homosexual	29
1129	Condition 1	5c	5	c	30	36	Undergraduate University Degree	United States	None of these define my ethnic group	Female	0- Exclusively heterosexual with no homosexual	29
1834	Condition 1	5c	5	c	60	36	Post Graduate University Degree	United Arab Emirates	South American	Female	0- Exclusively heterosexual with no homosexual	29
960	Condition 1	5c	5	c	80	35	Undergraduate University Degree	United States	North Western European, British or Irish	Female	0- Exclusively heterosexual with no homosexual	29
1432	Condition 1	5c	5	c	50	34	Diploma	Canada	North Western European, British or Irish	Female	0- Exclusively heterosexual with no homosexual	29
1017	Condition 1	5c	5	c	60	34	Undergraduate University Degree	Canada	North Western European, British or Irish	Female	0- Exclusively heterosexual with no homosexual	29
1723	Condition 1	5c	5	c	60	34	Undergraduate University Degree	New Zealand	North Western European, British or Irish	Female	0- Exclusively heterosexual with no homosexual	29
494	Condition 1	5c	5	c	60	32	Post Graduate University Degree	Isreal	None of these define my ethnic group	Female	0- Exclusively heterosexual with no homosexual	29
124	Condition 1	5c	5	c	45	31	Undergraduate University Degree	Australia	European Mixed Race	Female	0- Exclusively heterosexual with no homosexual	29
1118	Condition 1	5c	5	c	50	31	Post Graduate University Degree	United Kingdom	North Western European, British or Irish	Female	0- Exclusively heterosexual with no homosexual	29
1145	Condition 1	5c	5	c	70	31	Undergraduate University Degree	United States	None of these define my ethnic group	Female	0- Exclusively heterosexual with no homosexual	29
1349	Condition 1	5c	5	c	90	31	Undergraduate University Degree	Germany	North Western European, British or Irish	Female	0- Exclusively heterosexual with no homosexual	29
107	Condition 1	5c	5	c	55	30	Doctorate/PhD	China	None of these define my ethnic group	Female	0- Exclusively heterosexual with no homosexual	29
1202	Condition 1	5c	5	c	80	30	Undergraduate University Degree	United States	North Western European, British or Irish	Female	0- Exclusively heterosexual with no homosexual	29
1667	Condition 1	5c	5	c	80	30	Doctorate/PhD	Australia	North Western European, British or Irish	Female	0- Exclusively heterosexual with no homosexual	29
2002	Condition 1	5c	5	c	45	29	Doctorate/PhD	New Zealand	Chinese Asian	Female	0- Exclusively heterosexual with no homosexual	29
1719	Condition 1	5c	5	c	50	29	Undergraduate University Degree	United States	Native American Mixed Race	Female	0- Exclusively heterosexual with no homosexual	29
1509	Condition 1	5c	5	c	85	28	Other/Currently enrolled in college	United States	None of these define my ethnic group	Female	0- Exclusively heterosexual with no homosexual	29
1215	Condition 1	5c	5	c	75	27	Undergraduate University Degree	Germany	North Western European, British or Irish	Female	0- Exclusively heterosexual with no homosexual	29
636	Condition 1	5c	5	c	80	27	Undergraduate University Degree	United States	Native American Mixed Race	Female	0- Exclusively heterosexual with no homosexual	29
1341	Condition 1	5c	5	c	50	26	High School	Canada	European Mixed Race	Female	0- Exclusively heterosexual with no homosexual	29
1170	Condition 1	5c	5	c	60	26	Undergraduate University Degree	Italy	Southern European	Female	0- Exclusively heterosexual with no homosexual	29
1338	Condition 1	5c	5	c	80	26	Post Graduate University Degree	Chile	South American	Female	0- Exclusively heterosexual with no homosexual	29
672	Condition 1	5c	5	c	30	25	Post Graduate University Degree	India	South East Asian	Female	0- Exclusively heterosexual with no homosexual	29
866	Condition 1	5c	5	c	30	24	Post Graduate University Degree	United Kingdom	European Mixed Race	Female	0- Exclusively heterosexual with no homosexual	29
439	Condition 1	5c	5	c	45	24	Undergraduate University Degree	Taiwan	Chinese Asian	Female	0- Exclusively heterosexual with no homosexual	29
1854	Condition 1	5c	5	c	55	24	High School	United Kingdom	North Western European, British or Irish	Female	0- Exclusively heterosexual with no homosexual	29
725	Condition 1	5c	5	c	70	24	Undergraduate University Degree	United States	Chinese Asian	Female	0- Exclusively heterosexual with no homosexual	29
1339	Condition 1	5c	5	c	70	24	Post Graduate University Degree	Japan	North Western European, British or Irish	Female	0- Exclusively heterosexual with no homosexual	29
476	Condition 1	5c	5	c	80	24	Undergraduate University Degree	United States	European Mixed Race	Female	0- Exclusively heterosexual with no homosexual	29
1312	Condition 1	5c	5	c	30	23	Undergraduate University Degree	Mexico	European Mixed Race	Female	0- Exclusively heterosexual with no homosexual	29
1169	Condition 1	5c	5	c	75	23	Undergraduate University Degree	Germany	North Western European, British or Irish	Female	0- Exclusively heterosexual with no homosexual	29
480	Condition 1	5c	5	c	55	22	Undergraduate University Degree	India	South East Asian	Female	0- Exclusively heterosexual with no homosexual	29
1578	Condition 1	5c	5	c	90	22	Undergraduate University Degree	United States	European Mixed Race	Female	0- Exclusively heterosexual with no homosexual	29
864	Condition 1	5c	5	c	65	21	High School	United Kingdom	North Western European, British or Irish	Female	0- Exclusively heterosexual with no homosexual	29
1647	Condition 1	5c	5	c	65	21	Undergraduate University Degree	United Kingdom	North Western European, British or Irish	Female	0- Exclusively heterosexual with no homosexual	29
146	Condition 1	5c	5	c	80	21	Undergraduate University Degree	Australia	North Western European, British or Irish	Female	0- Exclusively heterosexual with no homosexual	29
1499	Condition 1	5c	5	c	80	21	Undergraduate University Degree	Germany	North Western European, British or Irish	Female	0- Exclusively heterosexual with no homosexual	29
304	Condition 1	5c	5	c	60	20	Undergraduate University Degree	Malaysia	Chinese Asian	Female	0- Exclusively heterosexual with no homosexual	29
1397	Condition 1	5c	5	c	60	20	Undergraduate University Degree	Portugal	Southern European	Female	0- Exclusively heterosexual with no homosexual	29
1320	Condition 1	5c	5	c	65	20	High School	United States	North Western European, British or Irish	Female	0- Exclusively heterosexual with no homosexual	29
1249	Condition 1	5c	5	c	25	19	Undergraduate University Degree	India	Southern Asian	Female	0- Exclusively heterosexual with no homosexual	29
396	Condition 1	5c	5	c	35	19	Diploma	United States	European Mixed Race	Female	0- Exclusively heterosexual with no homosexual	29
323	Condition 1	5c	5	c	55	19	Undergraduate University Degree	Australia	North Western European, British or Irish	Female	0- Exclusively heterosexual with no homosexual	29
908	Condition 1	5c	5	c	55	19	Undergraduate University Degree	United Kingdom	European Mixed Race	Female	0- Exclusively heterosexual with no homosexual	29
889	Condition 1	5c	5	c	35	18	High School	Australia	Chinese Asian	Female	0- Exclusively heterosexual with no homosexual	29
1943	Condition 1	5c	5	c	50	18	High School	United States	North Western European, British or Irish	Female	0- Exclusively heterosexual with no homosexual	29
649	Condition 1	5c	5	c	55	18	High School	Australia	North Western European, British or Irish	Female	0- Exclusively heterosexual with no homosexual	29
1092	Condition 1	5c	5	c	55	18	Undergraduate University Degree	Portugal	Southern European	Female	0- Exclusively heterosexual with no homosexual	29
151	Condition 1	5c	5	c	65	18	Undergraduate University Degree	Australia	Southern Asian	Female	0- Exclusively heterosexual with no homosexual	29
1292	Condition 1	5c	5	c	65	18	High School	Portugal	Southern European	Female	0- Exclusively heterosexual with no homosexual	29
474	Condition 1	5c	5	c	70	34	Post Graduate University Degree	Germany	North Western European, British or Irish	Female	0- Exclusively heterosexual with no homosexual, 1- Predominantly heterosexual, only incidentally homosexual	29
1958	Condition 1	5c	5	c	65	19	High School	United Kingdom	North Western European, British or Irish	Female	0- Exclusively heterosexual with no homosexual, 1- Predominantly heterosexual, only incidentally homosexual	29
1825	Condition 1	5c	5	c	50	22	Undergraduate University Degree	United States	European Mixed Race	Female	0- Exclusively heterosexual with no homosexual, 1- Predominantly heterosexual, only incidentally homosexual, 2- Predominantly heterosexual, but more than incidentally homosexual, 3- Equally heterosexual and homosexual, 4- Predominantly homosexual, but more than incidentally heterosexual, 5- Predominantly homosexual, only incidentally heterosexual, 6- Exclusively homosexual	29
1316	Condition 1	5c	5	c	70	40	Undergraduate University Degree	Canada	European Mixed Race	Female	1- Predominantly heterosexual, only incidentally homosexual	29
1602	Condition 1	5c	5	c	65	39	Post Graduate University Degree	United States	South Eastern and Eastern European	Female	1- Predominantly heterosexual, only incidentally homosexual	29
1441	Condition 1	5c	5	c	55	36	Undergraduate University Degree	Canada	Caribbean Islander	Female	1- Predominantly heterosexual, only incidentally homosexual	29
1361	Condition 1	5c	5	c	50	33	Other/Attending college	United States	European Mixed Race	Female	1- Predominantly heterosexual, only incidentally homosexual	29
1127	Condition 1	5c	5	c	65	32	Undergraduate University Degree	United States	None of these define my ethnic group	Female	1- Predominantly heterosexual, only incidentally homosexual	29
689	Condition 1	5c	5	c	50	31	Undergraduate University Degree	Australia	North Western European, British or Irish	Female	1- Predominantly heterosexual, only incidentally homosexual	29
1177	Condition 1	5c	5	c	50	31	Post Graduate University Degree	United States	European Mixed Race	Female	1- Predominantly heterosexual, only incidentally homosexual	29
126	Condition 1	5c	5	c	50	30	Undergraduate University Degree	Australia	European Mixed Race	Female	1- Predominantly heterosexual, only incidentally homosexual	29
1290	Condition 1	5c	5	c	55	30	Other/Trade School	United States	South Eastern and Eastern European	Female	1- Predominantly heterosexual, only incidentally homosexual	29
1407	Condition 1	5c	5	c	65	30	Undergraduate University Degree	United States	European Mixed Race	Female	1- Predominantly heterosexual, only incidentally homosexual	29
905	Condition 1	5c	5	c	75	30	Post Graduate University Degree	United States	European Mixed Race	Female	1- Predominantly heterosexual, only incidentally homosexual	29
302	Condition 1	5c	5	c	40	29	Undergraduate University Degree	Australia	Mixed Race Australian	Female	1- Predominantly heterosexual, only incidentally homosexual	29
1964	Condition 1	5c	5	c	85	29	High School	United States	European Mixed Race	Female	1- Predominantly heterosexual, only incidentally homosexual	29
1648	Condition 1	5c	5	c	15	27	Undergraduate University Degree	United States	North Western European, British or Irish	Female	1- Predominantly heterosexual, only incidentally homosexual	29
1721	Condition 1	5c	5	c	50	27	Doctorate/PhD	United States	South Eastern and Eastern European	Female	1- Predominantly heterosexual, only incidentally homosexual	29
1624	Condition 1	5c	5	c	80	27	Post Graduate University Degree	Chile	European Mixed Race	Female	1- Predominantly heterosexual, only incidentally homosexual	29
731	Condition 1	5c	5	c	45	26	Undergraduate University Degree	Italy	North Western European, British or Irish	Female	1- Predominantly heterosexual, only incidentally homosexual	29
1373	Condition 1	5c	5	c	50	26	High School	United States	North Western European, British or Irish	Female	1- Predominantly heterosexual, only incidentally homosexual	29
1857	Condition 1	5c	5	c	70	26	Post Graduate University Degree	Spain	European Mixed Race	Female	1- Predominantly heterosexual, only incidentally homosexual	29
1261	Condition 1	5c	5	c	55	25	Undergraduate University Degree	United States	North Western European, British or Irish	Female	1- Predominantly heterosexual, only incidentally homosexual	29
2007	Condition 1	5c	5	c	60	25	Undergraduate University Degree	Canada	North Western European, British or Irish	Female	1- Predominantly heterosexual, only incidentally homosexual	29
1740	Condition 1	5c	5	c	40	24	High School	United States	Southern European	Female	1- Predominantly heterosexual, only incidentally homosexual	29
1020	Condition 1	5c	5	c	65	24	Post Graduate University Degree	Netherlands	European Mixed Race	Female	1- Predominantly heterosexual, only incidentally homosexual	29
620	Condition 1	5c	5	c	70	24	Post Graduate University Degree	United States	European Mixed Race	Female	1- Predominantly heterosexual, only incidentally homosexual	29
1252	Condition 1	5c	5	c	75	24	Undergraduate University Degree	Canada	North Western European, British or Irish	Female	1- Predominantly heterosexual, only incidentally homosexual	29
413	Condition 1	5c	5	c	40	23	Diploma	United States	European Mixed Race	Female	1- Predominantly heterosexual, only incidentally homosexual	29
20	Condition 1	5c	5	c	45	23	Undergraduate University Degree	Australia	South East Asian	Female	1- Predominantly heterosexual, only incidentally homosexual	29
1497	Condition 1	5c	5	c	45	23	Undergraduate University Degree	United States	European Mixed Race	Female	1- Predominantly heterosexual, only incidentally homosexual	29
289	Condition 1	5c	5	c	55	23	Undergraduate University Degree	Australia	South East Asian	Female	1- Predominantly heterosexual, only incidentally homosexual	29
1626	Condition 1	5c	5	c	70	23	Undergraduate University Degree	United Kingdom	North Western European, British or Irish	Female	1- Predominantly heterosexual, only incidentally homosexual	29
1861	Condition 1	5c	5	c	70	23	Undergraduate University Degree	Spain	North Western European, British or Irish	Female	1- Predominantly heterosexual, only incidentally homosexual	29
1889	Condition 1	5c	5	c	70	23	Doctorate/PhD	United States	Southern Asian	Female	1- Predominantly heterosexual, only incidentally homosexual	29
276	Condition 1	5c	5	c	50	22	Undergraduate University Degree	Australia	Chinese Asian	Female	1- Predominantly heterosexual, only incidentally homosexual	29
1411	Condition 1	5c	5	c	60	22	Undergraduate University Degree	United States	North Western European, British or Irish	Female	1- Predominantly heterosexual, only incidentally homosexual	29
3	Condition 1	5c	5	c	65	22	Undergraduate University Degree	Australia	Southern Asian	Female	1- Predominantly heterosexual, only incidentally homosexual	29
732	Condition 1	5c	5	c	80	22	Undergraduate University Degree	United Kingdom	North Western European, British or Irish	Female	1- Predominantly heterosexual, only incidentally homosexual	29
86	Condition 1	5c	5	c	20	21	Undergraduate University Degree	Australia	North Western European, British or Irish	Female	1- Predominantly heterosexual, only incidentally homosexual	29
820	Condition 1	5c	5	c	30	21	Diploma	Other - East European	South Eastern and Eastern European	Female	1- Predominantly heterosexual, only incidentally homosexual	29
224	Condition 1	5c	5	c	45	21	Undergraduate University Degree	Australia	North Western European, British or Irish	Female	1- Predominantly heterosexual, only incidentally homosexual	29
1044	Condition 1	5c	5	c	80	21	Undergraduate University Degree	Australia	Mixed Race Australian	Female	1- Predominantly heterosexual, only incidentally homosexual	29
656	Condition 1	5c	5	c	35	20	High School	Czech Republic	European Mixed Race	Female	1- Predominantly heterosexual, only incidentally homosexual	29
813	Condition 1	5c	5	c	35	20	Undergraduate University Degree	Ireland	North Western European, British or Irish	Female	1- Predominantly heterosexual, only incidentally homosexual	29
308	Condition 1	5c	5	c	55	20	High School	Australia	Southern Asian	Female	1- Predominantly heterosexual, only incidentally homosexual	29
1311	Condition 1	5c	5	c	55	20	Undergraduate University Degree	United States	None of these define my ethnic group	Female	1- Predominantly heterosexual, only incidentally homosexual	29
722	Condition 1	5c	5	c	75	20	High School	Czech Republic	South Eastern and Eastern European	Female	1- Predominantly heterosexual, only incidentally homosexual	29
448	Condition 1	5c	5	c	40	19	Undergraduate University Degree	United States	Native North American or First Nation	Female	1- Predominantly heterosexual, only incidentally homosexual	29
1702	Condition 1	5c	5	c	45	19	High School	Portugal	Southern European	Female	1- Predominantly heterosexual, only incidentally homosexual	29
1731	Condition 1	5c	5	c	50	19	Undergraduate University Degree	Canada	Chinese Asian	Female	1- Predominantly heterosexual, only incidentally homosexual	29
1701	Condition 1	5c	5	c	55	19	Undergraduate University Degree	United Kingdom	North Western European, British or Irish	Female	1- Predominantly heterosexual, only incidentally homosexual	29
749	Condition 1	5c	5	c	80	19	High School	United Kingdom	North Western European, British or Irish	Female	1- Predominantly heterosexual, only incidentally homosexual	29
1764	Condition 1	5c	5	c	50	18	High School	Other - East European	South Eastern and Eastern European	Female	1- Predominantly heterosexual, only incidentally homosexual	29
1562	Condition 1	5c	5	c	55	18	High School	Germany	Southern European	Female	1- Predominantly heterosexual, only incidentally homosexual	29
738	Condition 1	5c	5	c	70	18	High School	United Kingdom	North Western European, British or Irish	Female	1- Predominantly heterosexual, only incidentally homosexual	29
477	Condition 1	5c	5	c	55	38	Undergraduate University Degree	United States	North Western European, British or Irish	Female	2- Predominantly heterosexual, but more than incidentally homosexual	29
880	Condition 1	5c	5	c	65	38	Post Graduate University Degree	United States	North Western European, British or Irish	Female	2- Predominantly heterosexual, but more than incidentally homosexual	29
1223	Condition 1	5c	5	c	85	38	Undergraduate University Degree	United States	European Mixed Race	Female	2- Predominantly heterosexual, but more than incidentally homosexual	29
1098	Condition 1	5c	5	c	80	34	Undergraduate University Degree	United States	European Mixed Race	Female	2- Predominantly heterosexual, but more than incidentally homosexual	29
1348	Condition 1	5c	5	c	70	30	Undergraduate University Degree	United States	North Western European, British or Irish	Female	2- Predominantly heterosexual, but more than incidentally homosexual	29
1946	Condition 1	5c	5	c	70	30	Undergraduate University Degree	United States	European Mixed Race	Female	2- Predominantly heterosexual, but more than incidentally homosexual	29
1310	Condition 1	5c	5	c	50	29	Undergraduate University Degree	United States	None of these define my ethnic group	Female	2- Predominantly heterosexual, but more than incidentally homosexual	29
1879	Condition 1	5c	5	c	60	26	Undergraduate University Degree	United States	North Western European, British or Irish	Female	2- Predominantly heterosexual, but more than incidentally homosexual	29
221	Condition 1	5c	5	c	45	24	Undergraduate University Degree	Australia	Mixed Race Australian	Female	2- Predominantly heterosexual, but more than incidentally homosexual	29
235	Condition 1	5c	5	c	75	24	Undergraduate University Degree	Australia	Chinese Asian	Female	2- Predominantly heterosexual, but more than incidentally homosexual	29
1377	Condition 1	5c	5	c	65	23	Post Graduate University Degree	United States	European Mixed Race	Female	2- Predominantly heterosexual, but more than incidentally homosexual	29
535	Condition 1	5c	5	c	75	23	Undergraduate University Degree	United States	European Mixed Race	Female	2- Predominantly heterosexual, but more than incidentally homosexual	29
1115	Condition 1	5c	5	c	85	22	Undergraduate University Degree	United States	Southern European	Female	2- Predominantly heterosexual, but more than incidentally homosexual	29
1277	Condition 1	5c	5	c	15	21	High School	United States	North Western European, British or Irish	Female	2- Predominantly heterosexual, but more than incidentally homosexual	29
1229	Condition 1	5c	5	c	70	21	High School	New Zealand	European Mixed Race	Female	2- Predominantly heterosexual, but more than incidentally homosexual	29
466	Condition 1	5c	5	c	40	19	High School	Australia	North Western European, British or Irish	Female	2- Predominantly heterosexual, but more than incidentally homosexual	29
1300	Condition 1	5c	5	c	45	19	Diploma	Switzerland	Other Asian or Mixed Race Asian	Female	2- Predominantly heterosexual, but more than incidentally homosexual	29
423	Condition 1	5c	5	c	70	19	High School	United States	Other Asian or Mixed Race Asian	Female	2- Predominantly heterosexual, but more than incidentally homosexual	29
1855	Condition 1	5c	5	c	35	35	High School	United States	Southern European	Female	3- Equally heterosexual and homosexual	29
395	Condition 1	5c	5	c	90	33	Post Graduate University Degree	United States	None of these define my ethnic group	Female	3- Equally heterosexual and homosexual	29
583	Condition 1	5c	5	c	40	26	Post Graduate University Degree	United Kingdom	European Mixed Race	Female	3- Equally heterosexual and homosexual	29
1534	Condition 1	5c	5	c	65	26	High School	United States	Native North American or First Nation	Female	3- Equally heterosexual and homosexual	29
1240	Condition 1	5c	5	c	40	24	Diploma	Canada	North Western European, British or Irish	Female	3- Equally heterosexual and homosexual	29
43	Condition 1	5c	5	c	50	22	Undergraduate University Degree	Australia	South East Asian	Female	3- Equally heterosexual and homosexual	29
605	Condition 1	5c	5	c	55	20	Diploma	United States	European Mixed Race	Female	3- Equally heterosexual and homosexual	29
1262	Condition 1	5c	5	c	60	20	Undergraduate University Degree	Netherlands	None of these define my ethnic group	Female	3- Equally heterosexual and homosexual	29
1076	Condition 1	6a	6	a	50	48	Other/College Grad	Canada	North Western European, British or Irish	Female	0- Exclusively heterosexual with no homosexual	25
122	Condition 1	6a	6	a	55	46	Undergraduate University Degree	Australia	None of these define my ethnic group	Female	0- Exclusively heterosexual with no homosexual	25
1929	Condition 1	6a	6	a	65	44	Undergraduate University Degree	United States	European Mixed Race	Female	0- Exclusively heterosexual with no homosexual	25
1201	Condition 1	6a	6	a	85	40	Undergraduate University Degree	Canada	North Western European, British or Irish	Female	0- Exclusively heterosexual with no homosexual	25
673	Condition 1	6a	6	a	45	38	Post Graduate University Degree	Sweden	North Western European, British or Irish	Female	0- Exclusively heterosexual with no homosexual	25
28	Condition 1	6a	6	a	70	37	Post Graduate University Degree	Australia	North Western European, British or Irish	Female	0- Exclusively heterosexual with no homosexual	25
1985	Condition 1	6a	6	a	45	35	Undergraduate University Degree	Brazil	Southern European	Female	0- Exclusively heterosexual with no homosexual	25
1432	Condition 1	6a	6	a	30	34	Diploma	Canada	North Western European, British or Irish	Female	0- Exclusively heterosexual with no homosexual	25
1723	Condition 1	6a	6	a	50	34	Undergraduate University Degree	New Zealand	North Western European, British or Irish	Female	0- Exclusively heterosexual with no homosexual	25
1669	Condition 1	6a	6	a	50	33	Undergraduate University Degree	Egypt	North African or Middle Eastern Arab	Female	0- Exclusively heterosexual with no homosexual	25
1887	Condition 1	6a	6	a	60	33	Doctorate/PhD	Portugal	European Mixed Race	Female	0- Exclusively heterosexual with no homosexual	25
494	Condition 1	6a	6	a	75	32	Post Graduate University Degree	Isreal	None of these define my ethnic group	Female	0- Exclusively heterosexual with no homosexual	25
1118	Condition 1	6a	6	a	75	31	Post Graduate University Degree	United Kingdom	North Western European, British or Irish	Female	0- Exclusively heterosexual with no homosexual	25
107	Condition 1	6a	6	a	55	30	Doctorate/PhD	China	None of these define my ethnic group	Female	0- Exclusively heterosexual with no homosexual	25
1256	Condition 1	6a	6	a	55	30	Post Graduate University Degree	Argentina	South American	Female	0- Exclusively heterosexual with no homosexual	25
1822	Condition 1	6a	6	a	70	30	Undergraduate University Degree	United States	South Eastern and Eastern European	Female	0- Exclusively heterosexual with no homosexual	25
145	Condition 1	6a	6	a	35	29	Diploma	Australia	Other Asian or Mixed Race Asian	Female	0- Exclusively heterosexual with no homosexual	25
1719	Condition 1	6a	6	a	50	29	Undergraduate University Degree	United States	Native American Mixed Race	Female	0- Exclusively heterosexual with no homosexual	25
1086	Condition 1	6a	6	a	65	29	Undergraduate University Degree	United States	European Mixed Race	Female	0- Exclusively heterosexual with no homosexual	25
2002	Condition 1	6a	6	a	70	29	Doctorate/PhD	New Zealand	Chinese Asian	Female	0- Exclusively heterosexual with no homosexual	25
12	Condition 1	6a	6	a	40	28	Undergraduate University Degree	United States	North Western European, British or Irish	Female	0- Exclusively heterosexual with no homosexual	25
587	Condition 1	6a	6	a	50	28	Post Graduate University Degree	Australia	North Western European, British or Irish	Female	0- Exclusively heterosexual with no homosexual	25
1509	Condition 1	6a	6	a	85	28	Other/Currently enrolled in college	United States	None of these define my ethnic group	Female	0- Exclusively heterosexual with no homosexual	25
1543	Condition 1	6a	6	a	40	27	Doctorate/PhD	Germany	South American	Female	0- Exclusively heterosexual with no homosexual	25
1072	Condition 1	6a	6	a	55	27	Diploma	Portugal	None of these define my ethnic group	Female	0- Exclusively heterosexual with no homosexual	25
1872	Condition 1	6a	6	a	65	27	Post Graduate University Degree	Germany	European Mixed Race	Female	0- Exclusively heterosexual with no homosexual	25
606	Condition 1	6a	6	a	70	27	Doctorate/PhD	Greece	South Eastern and Eastern European	Female	0- Exclusively heterosexual with no homosexual	25
632	Condition 1	6a	6	a	75	27	Post Graduate University Degree	France	North Western European, British or Irish	Female	0- Exclusively heterosexual with no homosexual	25
636	Condition 1	6a	6	a	75	27	Undergraduate University Degree	United States	Native American Mixed Race	Female	0- Exclusively heterosexual with no homosexual	25
1365	Condition 1	6a	6	a	65	26	Doctorate/PhD	United States	European Mixed Race	Female	0- Exclusively heterosexual with no homosexual	25
109	Condition 1	6a	6	a	70	26	Doctorate/PhD	China	Chinese Asian	Female	0- Exclusively heterosexual with no homosexual	25
1338	Condition 1	6a	6	a	85	26	Post Graduate University Degree	Chile	South American	Female	0- Exclusively heterosexual with no homosexual	25
1732	Condition 1	6a	6	a	35	25	Post Graduate University Degree	Brazil	South Eastern and Eastern European	Female	0- Exclusively heterosexual with no homosexual	25
672	Condition 1	6a	6	a	45	25	Post Graduate University Degree	India	South East Asian	Female	0- Exclusively heterosexual with no homosexual	25
1159	Condition 1	6a	6	a	50	25	Undergraduate University Degree	United States	South American	Female	0- Exclusively heterosexual with no homosexual	25
866	Condition 1	6a	6	a	40	24	Post Graduate University Degree	United Kingdom	European Mixed Race	Female	0- Exclusively heterosexual with no homosexual	25
1854	Condition 1	6a	6	a	50	24	High School	United Kingdom	North Western European, British or Irish	Female	0- Exclusively heterosexual with no homosexual	25
439	Condition 1	6a	6	a	60	24	Undergraduate University Degree	Taiwan	Chinese Asian	Female	0- Exclusively heterosexual with no homosexual	25
890	Condition 1	6a	6	a	60	24	Post Graduate University Degree	Spain	Southern European	Female	0- Exclusively heterosexual with no homosexual	25
476	Condition 1	6a	6	a	85	24	Undergraduate University Degree	United States	European Mixed Race	Female	0- Exclusively heterosexual with no homosexual	25
1891	Condition 1	6a	6	a	60	23	Undergraduate University Degree	Canada	North Western European, British or Irish	Female	0- Exclusively heterosexual with no homosexual	25
875	Condition 1	6a	6	a	65	23	Undergraduate University Degree	Australia	South Eastern and Eastern European	Female	0- Exclusively heterosexual with no homosexual	25
391	Condition 1	6a	6	a	85	23	Undergraduate University Degree	Canada	North Western European, British or Irish	Female	0- Exclusively heterosexual with no homosexual	25
414	Condition 1	6a	6	a	25	22	Undergraduate University Degree	Other - East European	South Eastern and Eastern European	Female	0- Exclusively heterosexual with no homosexual	25
876	Condition 1	6a	6	a	30	22	Diploma	Italy	Southern European	Female	0- Exclusively heterosexual with no homosexual	25
2011	Condition 1	6a	6	a	45	22	Undergraduate University Degree	United States	North Western European, British or Irish	Female	0- Exclusively heterosexual with no homosexual	25
878	Condition 1	6a	6	a	60	22	High School	Australia	Mixed Race Australian	Female	0- Exclusively heterosexual with no homosexual	25
376	Condition 1	6a	6	a	45	21	Undergraduate University Degree	United States	European Mixed Race	Female	0- Exclusively heterosexual with no homosexual	25
864	Condition 1	6a	6	a	50	21	High School	United Kingdom	North Western European, British or Irish	Female	0- Exclusively heterosexual with no homosexual	25
1333	Condition 1	6a	6	a	50	21	Undergraduate University Degree	United States	European Mixed Race	Female	0- Exclusively heterosexual with no homosexual	25
1903	Condition 1	6a	6	a	50	21	Diploma	United States	North Western European, British or Irish	Female	0- Exclusively heterosexual with no homosexual	25
1499	Condition 1	6a	6	a	70	21	Undergraduate University Degree	Germany	North Western European, British or Irish	Female	0- Exclusively heterosexual with no homosexual	25
1606	Condition 1	6a	6	a	40	20	High School	United States	European Mixed Race	Female	0- Exclusively heterosexual with no homosexual	25
185	Condition 1	6a	6	a	50	20	Undergraduate University Degree	Australia	South East Asian	Female	0- Exclusively heterosexual with no homosexual	25
814	Condition 1	6a	6	a	60	20	Undergraduate University Degree	Australia	European Mixed Race	Female	0- Exclusively heterosexual with no homosexual	25
1489	Condition 1	6a	6	a	70	20	Undergraduate University Degree	United States	North Western European, British or Irish	Female	0- Exclusively heterosexual with no homosexual	25
1249	Condition 1	6a	6	a	35	19	Undergraduate University Degree	India	Southern Asian	Female	0- Exclusively heterosexual with no homosexual	25
1910	Condition 1	6a	6	a	40	19	Diploma	Netherlands	South Eastern and Eastern European	Female	0- Exclusively heterosexual with no homosexual	25
293	Condition 1	6a	6	a	50	19	Undergraduate University Degree	Australia	Chinese Asian	Female	0- Exclusively heterosexual with no homosexual	25
363	Condition 1	6a	6	a	50	19	High School	Australia	Other North-East Asian	Female	0- Exclusively heterosexual with no homosexual	25
203	Condition 1	6a	6	a	55	19	High School	Australia	European Mixed Race	Female	0- Exclusively heterosexual with no homosexual	25
630	Condition 1	6a	6	a	55	19	Undergraduate University Degree	United Kingdom	North Western European, British or Irish	Female	0- Exclusively heterosexual with no homosexual	25
1146	Condition 1	6a	6	a	70	19	Undergraduate University Degree	Australia	North Western European, British or Irish	Female	0- Exclusively heterosexual with no homosexual	25
151	Condition 1	6a	6	a	35	18	Undergraduate University Degree	Australia	Southern Asian	Female	0- Exclusively heterosexual with no homosexual	25
2005	Condition 1	6a	6	a	35	18	High School	Australia	Chinese Asian	Female	0- Exclusively heterosexual with no homosexual	25
1302	Condition 1	6a	6	a	80	18	High School	Australia	European Mixed Race	Female	0- Exclusively heterosexual with no homosexual	25
1570	Condition 1	6a	6	a	50	22	High School	Mexico	Other Asian or Mixed Race Asian	Female	0- Exclusively heterosexual with no homosexual, 1- Predominantly heterosexual, only incidentally homosexual	25
1958	Condition 1	6a	6	a	55	19	High School	United Kingdom	North Western European, British or Irish	Female	0- Exclusively heterosexual with no homosexual, 1- Predominantly heterosexual, only incidentally homosexual	25
1825	Condition 1	6a	6	a	50	22	Undergraduate University Degree	United States	European Mixed Race	Female	0- Exclusively heterosexual with no homosexual, 1- Predominantly heterosexual, only incidentally homosexual, 2- Predominantly heterosexual, but more than incidentally homosexual, 3- Equally heterosexual and homosexual, 4- Predominantly homosexual, but more than incidentally heterosexual, 5- Predominantly homosexual, only incidentally heterosexual, 6- Exclusively homosexual	25
1512	Condition 1	6a	6	a	75	45	Undergraduate University Degree	United States	North Western European, British or Irish	Female	1- Predominantly heterosexual, only incidentally homosexual	25
1602	Condition 1	6a	6	a	55	39	Post Graduate University Degree	United States	South Eastern and Eastern European	Female	1- Predominantly heterosexual, only incidentally homosexual	25
1971	Condition 1	6a	6	a	40	37	Post Graduate University Degree	United States	South Eastern and Eastern European	Female	1- Predominantly heterosexual, only incidentally homosexual	25
1441	Condition 1	6a	6	a	40	36	Undergraduate University Degree	Canada	Caribbean Islander	Female	1- Predominantly heterosexual, only incidentally homosexual	25
622	Condition 1	6a	6	a	40	31	Post Graduate University Degree	Other - East European	North Western European, British or Irish	Female	1- Predominantly heterosexual, only incidentally homosexual	25
1186	Condition 1	6a	6	a	60	31	Undergraduate University Degree	United States	European Mixed Race	Female	1- Predominantly heterosexual, only incidentally homosexual	25
506	Condition 1	6a	6	a	15	30	Undergraduate University Degree	Mexico	Central American	Female	1- Predominantly heterosexual, only incidentally homosexual	25
905	Condition 1	6a	6	a	40	30	Post Graduate University Degree	United States	European Mixed Race	Female	1- Predominantly heterosexual, only incidentally homosexual	25
126	Condition 1	6a	6	a	55	30	Undergraduate University Degree	Australia	European Mixed Race	Female	1- Predominantly heterosexual, only incidentally homosexual	25
1581	Condition 1	6a	6	a	50	29	Undergraduate University Degree	Ireland	European Mixed Race	Female	1- Predominantly heterosexual, only incidentally homosexual	25
612	Condition 1	6a	6	a	55	29	Diploma	Germany	South Eastern and Eastern European	Female	1- Predominantly heterosexual, only incidentally homosexual	25
808	Condition 1	6a	6	a	65	29	Post Graduate University Degree	France	Southern European	Female	1- Predominantly heterosexual, only incidentally homosexual	25
72	Condition 1	6a	6	a	70	29	Post Graduate University Degree	Australia	Mixed Race Australian	Female	1- Predominantly heterosexual, only incidentally homosexual	25
1271	Condition 1	6a	6	a	60	28	Undergraduate University Degree	United States	None of these define my ethnic group	Female	1- Predominantly heterosexual, only incidentally homosexual	25
23	Condition 1	6a	6	a	80	28	Undergraduate University Degree	Australia	Other Asian or Mixed Race Asian	Female	1- Predominantly heterosexual, only incidentally homosexual	25
1382	Condition 1	6a	6	a	25	27	High School	United States	European Mixed Race	Female	1- Predominantly heterosexual, only incidentally homosexual	25
956	Condition 1	6a	6	a	70	27	Post Graduate University Degree	Netherlands	North Western European, British or Irish	Female	1- Predominantly heterosexual, only incidentally homosexual	25
1649	Condition 1	6a	6	a	40	26	Undergraduate University Degree	Australia	New Zealand Peoples	Female	1- Predominantly heterosexual, only incidentally homosexual	25
296	Condition 1	6a	6	a	55	24	Post Graduate University Degree	Australia	Mixed Race Australian	Female	1- Predominantly heterosexual, only incidentally homosexual	25
1497	Condition 1	6a	6	a	40	23	Undergraduate University Degree	United States	European Mixed Race	Female	1- Predominantly heterosexual, only incidentally homosexual	25
1585	Condition 1	6a	6	a	70	23	Post Graduate University Degree	Other - East European	European Mixed Race	Female	1- Predominantly heterosexual, only incidentally homosexual	25
134	Condition 1	6a	6	a	80	23	High School	Australia	North Western European, British or Irish	Female	1- Predominantly heterosexual, only incidentally homosexual	25
276	Condition 1	6a	6	a	50	22	Undergraduate University Degree	Australia	Chinese Asian	Female	1- Predominantly heterosexual, only incidentally homosexual	25
756	Condition 1	6a	6	a	80	22	Diploma	United States	North Western European, British or Irish	Female	1- Predominantly heterosexual, only incidentally homosexual	25
820	Condition 1	6a	6	a	25	21	Diploma	Other - East European	South Eastern and Eastern European	Female	1- Predominantly heterosexual, only incidentally homosexual	25
86	Condition 1	6a	6	a	30	21	Undergraduate University Degree	Australia	North Western European, British or Irish	Female	1- Predominantly heterosexual, only incidentally homosexual	25
1044	Condition 1	6a	6	a	60	21	Undergraduate University Degree	Australia	Mixed Race Australian	Female	1- Predominantly heterosexual, only incidentally homosexual	25
228	Condition 1	6a	6	a	75	21	Undergraduate University Degree	Australia	North Western European, British or Irish	Female	1- Predominantly heterosexual, only incidentally homosexual	25
1664	Condition 1	6a	6	a	50	20	High School	United States	Central American	Female	1- Predominantly heterosexual, only incidentally homosexual	25
1439	Condition 1	6a	6	a	70	20	Undergraduate University Degree	United Kingdom	North Western European, British or Irish	Female	1- Predominantly heterosexual, only incidentally homosexual	25
1702	Condition 1	6a	6	a	25	19	High School	Portugal	Southern European	Female	1- Predominantly heterosexual, only incidentally homosexual	25
1701	Condition 1	6a	6	a	30	19	Undergraduate University Degree	United Kingdom	North Western European, British or Irish	Female	1- Predominantly heterosexual, only incidentally homosexual	25
749	Condition 1	6a	6	a	45	19	High School	United Kingdom	North Western European, British or Irish	Female	1- Predominantly heterosexual, only incidentally homosexual	25
353	Condition 1	6a	6	a	70	18	High School	Other - Southern Europe	South Eastern and Eastern European	Female	1- Predominantly heterosexual, only incidentally homosexual	25
477	Condition 1	6a	6	a	55	38	Undergraduate University Degree	United States	North Western European, British or Irish	Female	2- Predominantly heterosexual, but more than incidentally homosexual	25
1358	Condition 1	6a	6	a	35	36	High School	United States	European Mixed Race	Female	2- Predominantly heterosexual, but more than incidentally homosexual	25
1096	Condition 1	6a	6	a	65	31	Post Graduate University Degree	Portugal	Southern European	Female	2- Predominantly heterosexual, but more than incidentally homosexual	25
1946	Condition 1	6a	6	a	75	30	Undergraduate University Degree	United States	European Mixed Race	Female	2- Predominantly heterosexual, but more than incidentally homosexual	25
1879	Condition 1	6a	6	a	55	26	Undergraduate University Degree	United States	North Western European, British or Irish	Female	2- Predominantly heterosexual, but more than incidentally homosexual	25
407	Condition 1	6a	6	a	60	26	Undergraduate University Degree	Finland	North Western European, British or Irish	Female	2- Predominantly heterosexual, but more than incidentally homosexual	25
221	Condition 1	6a	6	a	50	24	Undergraduate University Degree	Australia	Mixed Race Australian	Female	2- Predominantly heterosexual, but more than incidentally homosexual	25
235	Condition 1	6a	6	a	85	24	Undergraduate University Degree	Australia	Chinese Asian	Female	2- Predominantly heterosexual, but more than incidentally homosexual	25
1247	Condition 1	6a	6	a	45	23	High School	Sweden	North Western European, British or Irish	Female	2- Predominantly heterosexual, but more than incidentally homosexual	25
535	Condition 1	6a	6	a	75	23	Undergraduate University Degree	United States	European Mixed Race	Female	2- Predominantly heterosexual, but more than incidentally homosexual	25
1646	Condition 1	6a	6	a	40	22	Diploma	United States	Southern Asian	Female	2- Predominantly heterosexual, but more than incidentally homosexual	25
1115	Condition 1	6a	6	a	75	22	Undergraduate University Degree	United States	Southern European	Female	2- Predominantly heterosexual, but more than incidentally homosexual	25
1277	Condition 1	6a	6	a	5	21	High School	United States	North Western European, British or Irish	Female	2- Predominantly heterosexual, but more than incidentally homosexual	25
1130	Condition 1	6a	6	a	65	21	Diploma	Germany	North Western European, British or Irish	Female	2- Predominantly heterosexual, but more than incidentally homosexual	25
489	Condition 1	6a	6	a	25	19	Undergraduate University Degree	Australia	South Eastern and Eastern European	Female	2- Predominantly heterosexual, but more than incidentally homosexual	25
1300	Condition 1	6a	6	a	65	19	Diploma	Switzerland	Other Asian or Mixed Race Asian	Female	2- Predominantly heterosexual, but more than incidentally homosexual	25
996	Condition 1	6a	6	a	90	18	High School	Croatia	None of these define my ethnic group	Female	2- Predominantly heterosexual, but more than incidentally homosexual	25
1102	Condition 1	6a	6	a	60	37	Doctorate/PhD	United States	South Eastern and Eastern European	Female	3- Equally heterosexual and homosexual	25
1855	Condition 1	6a	6	a	35	35	High School	United States	Southern European	Female	3- Equally heterosexual and homosexual	25
1046	Condition 1	6a	6	a	45	26	Other/Technical Training + some college	United States	European Mixed Race	Female	3- Equally heterosexual and homosexual	25
583	Condition 1	6a	6	a	60	26	Post Graduate University Degree	United Kingdom	European Mixed Race	Female	3- Equally heterosexual and homosexual	25
1534	Condition 1	6a	6	a	70	26	High School	United States	Native North American or First Nation	Female	3- Equally heterosexual and homosexual	25
696	Condition 1	6a	6	a	80	26	High School	United States	North Western European, British or Irish	Female	3- Equally heterosexual and homosexual	25
41	Condition 1	6a	6	a	10	23	Other/College	Australia	North Western European, British or Irish	Female	3- Equally heterosexual and homosexual	25
1315	Condition 1	6a	6	a	40	19	Undergraduate University Degree	France	European Mixed Race	Female	3- Equally heterosexual and homosexual	25
1502	Condition 1	6b	6	b	60	49	Undergraduate University Degree	Austria	North Western European, British or Irish	Female	0- Exclusively heterosexual with no homosexual	25
268	Condition 1	6b	6	b	65	45	Undergraduate University Degree	Australia	North Western European, British or Irish	Female	0- Exclusively heterosexual with no homosexual	25
1052	Condition 1	6b	6	b	70	42	Other/3 years college	United States	European Mixed Race	Female	0- Exclusively heterosexual with no homosexual	25
1982	Condition 1	6b	6	b	40	40	Post Graduate University Degree	France	Southern European	Female	0- Exclusively heterosexual with no homosexual	25
1892	Condition 1	6b	6	b	35	39	Post Graduate University Degree	Other - Southern America	Other Central or South American or Mixed Race	Female	0- Exclusively heterosexual with no homosexual	25
332	Condition 1	6b	6	b	55	37	High School	Australia	North Western European, British or Irish	Female	0- Exclusively heterosexual with no homosexual	25
352	Condition 1	6b	6	b	60	37	Undergraduate University Degree	United States	North Western European, British or Irish	Female	0- Exclusively heterosexual with no homosexual	25
59	Condition 1	6b	6	b	45	34	Undergraduate University Degree	Australia	Mixed Race Australian	Female	0- Exclusively heterosexual with no homosexual	25
1017	Condition 1	6b	6	b	55	34	Undergraduate University Degree	Canada	North Western European, British or Irish	Female	0- Exclusively heterosexual with no homosexual	25
1484	Condition 1	6b	6	b	60	33	Other/some college	United States	None of these define my ethnic group	Female	0- Exclusively heterosexual with no homosexual	25
571	Condition 1	6b	6	b	40	32	Diploma	Australia	North Western European, British or Irish	Female	0- Exclusively heterosexual with no homosexual	25
1368	Condition 1	6b	6	b	65	32	Undergraduate University Degree	United States	Central American	Female	0- Exclusively heterosexual with no homosexual	25
124	Condition 1	6b	6	b	45	31	Undergraduate University Degree	Australia	European Mixed Race	Female	0- Exclusively heterosexual with no homosexual	25
923	Condition 1	6b	6	b	70	31	Undergraduate University Degree	Isreal	South American	Female	0- Exclusively heterosexual with no homosexual	25
684	Condition 1	6b	6	b	35	30	Post Graduate University Degree	United States	North Western European, British or Irish	Female	0- Exclusively heterosexual with no homosexual	25
1431	Condition 1	6b	6	b	60	30	Undergraduate University Degree	Other - East European	South Eastern and Eastern European	Female	0- Exclusively heterosexual with no homosexual	25
1667	Condition 1	6b	6	b	80	30	Doctorate/PhD	Australia	North Western European, British or Irish	Female	0- Exclusively heterosexual with no homosexual	25
913	Condition 1	6b	6	b	70	29	Undergraduate University Degree	Portugal	Southern European	Female	0- Exclusively heterosexual with no homosexual	25
8	Condition 1	6b	6	b	30	28	Undergraduate University Degree	Australia	North Western European, British or Irish	Female	0- Exclusively heterosexual with no homosexual	25
1426	Condition 1	6b	6	b	50	28	Undergraduate University Degree	United States	North Western European, British or Irish	Female	0- Exclusively heterosexual with no homosexual	25
314	Condition 1	6b	6	b	65	28	Undergraduate University Degree	Australia	Chinese Asian	Female	0- Exclusively heterosexual with no homosexual	25
1890	Condition 1	6b	6	b	75	28	Undergraduate University Degree	Malaysia	South East Asian	Female	0- Exclusively heterosexual with no homosexual	25
1342	Condition 1	6b	6	b	80	28	Post Graduate University Degree	United States	European Mixed Race	Female	0- Exclusively heterosexual with no homosexual	25
1140	Condition 1	6b	6	b	40	26	Post Graduate University Degree	Chile	South American	Female	0- Exclusively heterosexual with no homosexual	25
137	Condition 1	6b	6	b	45	26	Diploma	Australia	Mixed Race Australian	Female	0- Exclusively heterosexual with no homosexual	25
827	Condition 1	6b	6	b	65	26	Diploma	United States	None of these define my ethnic group	Female	0- Exclusively heterosexual with no homosexual	25
1339	Condition 1	6b	6	b	75	24	Post Graduate University Degree	Japan	North Western European, British or Irish	Female	0- Exclusively heterosexual with no homosexual	25
1312	Condition 1	6b	6	b	5	23	Undergraduate University Degree	Mexico	European Mixed Race	Female	0- Exclusively heterosexual with no homosexual	25
515	Condition 1	6b	6	b	40	23	Undergraduate University Degree	Australia	North Western European, British or Irish	Female	0- Exclusively heterosexual with no homosexual	25
1618	Condition 1	6b	6	b	50	23	Undergraduate University Degree	Greece	South Eastern and Eastern European	Female	0- Exclusively heterosexual with no homosexual	25
1389	Condition 1	6b	6	b	55	23	Post Graduate University Degree	Germany	Southern European	Female	0- Exclusively heterosexual with no homosexual	25
1169	Condition 1	6b	6	b	70	23	Undergraduate University Degree	Germany	North Western European, British or Irish	Female	0- Exclusively heterosexual with no homosexual	25
1546	Condition 1	6b	6	b	70	23	Undergraduate University Degree	United Kingdom	North Western European, British or Irish	Female	0- Exclusively heterosexual with no homosexual	25
1415	Condition 1	6b	6	b	75	23	Post Graduate University Degree	Italy	European Mixed Race	Female	0- Exclusively heterosexual with no homosexual	25
1334	Condition 1	6b	6	b	40	22	Undergraduate University Degree	Hungary	South Eastern and Eastern European	Female	0- Exclusively heterosexual with no homosexual	25
953	Condition 1	6b	6	b	45	22	Undergraduate University Degree	Italy	European Mixed Race	Female	0- Exclusively heterosexual with no homosexual	25
480	Condition 1	6b	6	b	55	22	Undergraduate University Degree	India	South East Asian	Female	0- Exclusively heterosexual with no homosexual	25
497	Condition 1	6b	6	b	60	22	Diploma	United States	Central American	Female	0- Exclusively heterosexual with no homosexual	25
959	Condition 1	6b	6	b	60	22	Undergraduate University Degree	Germany	North Western European, British or Irish	Female	0- Exclusively heterosexual with no homosexual	25
1623	Condition 1	6b	6	b	45	21	Undergraduate University Degree	Other - Middle East	South East Asian	Female	0- Exclusively heterosexual with no homosexual	25
370	Condition 1	6b	6	b	50	21	High School	Australia	North Western European, British or Irish	Female	0- Exclusively heterosexual with no homosexual	25
1791	Condition 1	6b	6	b	60	21	Undergraduate University Degree	United States	North Western European, British or Irish	Female	0- Exclusively heterosexual with no homosexual	25
146	Condition 1	6b	6	b	65	21	Undergraduate University Degree	Australia	North Western European, British or Irish	Female	0- Exclusively heterosexual with no homosexual	25
1397	Condition 1	6b	6	b	35	20	Undergraduate University Degree	Portugal	Southern European	Female	0- Exclusively heterosexual with no homosexual	25
304	Condition 1	6b	6	b	55	20	Undergraduate University Degree	Malaysia	Chinese Asian	Female	0- Exclusively heterosexual with no homosexual	25
201	Condition 1	6b	6	b	60	20	Undergraduate University Degree	Australia	North Western European, British or Irish	Female	0- Exclusively heterosexual with no homosexual	25
1320	Condition 1	6b	6	b	60	20	High School	United States	North Western European, British or Irish	Female	0- Exclusively heterosexual with no homosexual	25
155	Condition 1	6b	6	b	0	19	High School	Australia	North Western European, British or Irish	Female	0- Exclusively heterosexual with no homosexual	25
396	Condition 1	6b	6	b	30	19	Diploma	United States	European Mixed Race	Female	0- Exclusively heterosexual with no homosexual	25
323	Condition 1	6b	6	b	65	19	Undergraduate University Degree	Australia	North Western European, British or Irish	Female	0- Exclusively heterosexual with no homosexual	25
933	Condition 1	6b	6	b	70	19	High School	United States	European Mixed Race	Female	0- Exclusively heterosexual with no homosexual	25
1943	Condition 1	6b	6	b	15	18	High School	United States	North Western European, British or Irish	Female	0- Exclusively heterosexual with no homosexual	25
1292	Condition 1	6b	6	b	40	18	High School	Portugal	Southern European	Female	0- Exclusively heterosexual with no homosexual	25
1092	Condition 1	6b	6	b	45	18	Undergraduate University Degree	Portugal	Southern European	Female	0- Exclusively heterosexual with no homosexual	25
889	Condition 1	6b	6	b	50	18	High School	Australia	Chinese Asian	Female	0- Exclusively heterosexual with no homosexual	25
80	Condition 1	6b	6	b	55	18	Undergraduate University Degree	Australia	None of these define my ethnic group	Female	0- Exclusively heterosexual with no homosexual	25
1248	Condition 1	6b	6	b	55	18	Undergraduate University Degree	United States	Native American Mixed Race	Female	0- Exclusively heterosexual with no homosexual	25
226	Condition 1	6b	6	b	65	18	Undergraduate University Degree	Australia	South Eastern and Eastern European	Female	0- Exclusively heterosexual with no homosexual	25
316	Condition 1	6b	6	b	80	18	Undergraduate University Degree	Australia	Southern Asian	Female	0- Exclusively heterosexual with no homosexual	25
474	Condition 1	6b	6	b	65	34	Post Graduate University Degree	Germany	North Western European, British or Irish	Female	0- Exclusively heterosexual with no homosexual, 1- Predominantly heterosexual, only incidentally homosexual	25
1141	Condition 1	6b	6	b	65	47	Undergraduate University Degree	United States	North Western European, British or Irish	Female	1- Predominantly heterosexual, only incidentally homosexual	25
899	Condition 1	6b	6	b	60	45	Post Graduate University Degree	Australia	North Western European, British or Irish	Female	1- Predominantly heterosexual, only incidentally homosexual	25
1142	Condition 1	6b	6	b	65	41	Undergraduate University Degree	United States	None of these define my ethnic group	Female	1- Predominantly heterosexual, only incidentally homosexual	25
378	Condition 1	6b	6	b	55	36	Post Graduate University Degree	United States	North Western European, British or Irish	Female	1- Predominantly heterosexual, only incidentally homosexual	25
1131	Condition 1	6b	6	b	65	34	Undergraduate University Degree	United States	North Western European, British or Irish	Female	1- Predominantly heterosexual, only incidentally homosexual	25
1990	Condition 1	6b	6	b	55	33	Other/Associates Degree in Nursing	United States	European Mixed Race	Female	1- Predominantly heterosexual, only incidentally homosexual	25
895	Condition 1	6b	6	b	30	32	Undergraduate University Degree	Spain	Southern European	Female	1- Predominantly heterosexual, only incidentally homosexual	25
1127	Condition 1	6b	6	b	65	32	Undergraduate University Degree	United States	None of these define my ethnic group	Female	1- Predominantly heterosexual, only incidentally homosexual	25
970	Condition 1	6b	6	b	20	31	High School	Isreal	North African or Middle Eastern Jewish	Female	1- Predominantly heterosexual, only incidentally homosexual	25
35	Condition 1	6b	6	b	40	31	High School	United Kingdom	South Eastern and Eastern European	Female	1- Predominantly heterosexual, only incidentally homosexual	25
1177	Condition 1	6b	6	b	50	31	Post Graduate University Degree	United States	European Mixed Race	Female	1- Predominantly heterosexual, only incidentally homosexual	25
689	Condition 1	6b	6	b	55	31	Undergraduate University Degree	Australia	North Western European, British or Irish	Female	1- Predominantly heterosexual, only incidentally homosexual	25
949	Condition 1	6b	6	b	80	31	Undergraduate University Degree	United States	None of these define my ethnic group	Female	1- Predominantly heterosexual, only incidentally homosexual	25
736	Condition 1	6b	6	b	60	30	Undergraduate University Degree	United States	North Western European, British or Irish	Female	1- Predominantly heterosexual, only incidentally homosexual	25
1158	Condition 1	6b	6	b	80	29	Post Graduate University Degree	United States	None of these define my ethnic group	Female	1- Predominantly heterosexual, only incidentally homosexual	25
61	Condition 1	6b	6	b	40	27	Undergraduate University Degree	Australia	North Western European, British or Irish	Female	1- Predominantly heterosexual, only incidentally homosexual	25
1721	Condition 1	6b	6	b	45	27	Doctorate/PhD	United States	South Eastern and Eastern European	Female	1- Predominantly heterosexual, only incidentally homosexual	25
1355	Condition 1	6b	6	b	60	27	Undergraduate University Degree	United States	None of these define my ethnic group	Female	1- Predominantly heterosexual, only incidentally homosexual	25
1648	Condition 1	6b	6	b	70	27	Undergraduate University Degree	United States	North Western European, British or Irish	Female	1- Predominantly heterosexual, only incidentally homosexual	25
324	Condition 1	6b	6	b	40	26	Undergraduate University Degree	United Kingdom	North Western European, British or Irish	Female	1- Predominantly heterosexual, only incidentally homosexual	25
1857	Condition 1	6b	6	b	40	26	Post Graduate University Degree	Spain	European Mixed Race	Female	1- Predominantly heterosexual, only incidentally homosexual	25
1216	Condition 1	6b	6	b	50	25	Undergraduate University Degree	United Kingdom	Southern Asian	Female	1- Predominantly heterosexual, only incidentally homosexual	25
1253	Condition 1	6b	6	b	60	25	Diploma	United States	None of these define my ethnic group	Female	1- Predominantly heterosexual, only incidentally homosexual	25
1261	Condition 1	6b	6	b	65	25	Undergraduate University Degree	United States	North Western European, British or Irish	Female	1- Predominantly heterosexual, only incidentally homosexual	25
1020	Condition 1	6b	6	b	55	24	Post Graduate University Degree	Netherlands	European Mixed Race	Female	1- Predominantly heterosexual, only incidentally homosexual	25
83	Condition 1	6b	6	b	60	24	Undergraduate University Degree	Australia	North Western European, British or Irish	Female	1- Predominantly heterosexual, only incidentally homosexual	25
1740	Condition 1	6b	6	b	60	24	High School	United States	Southern European	Female	1- Predominantly heterosexual, only incidentally homosexual	25
1780	Condition 1	6b	6	b	65	24	Undergraduate University Degree	United States	Chinese Asian	Female	1- Predominantly heterosexual, only incidentally homosexual	25
1478	Condition 1	6b	6	b	35	23	Undergraduate University Degree	United States	European Mixed Race	Female	1- Predominantly heterosexual, only incidentally homosexual	25
413	Condition 1	6b	6	b	40	23	Diploma	United States	European Mixed Race	Female	1- Predominantly heterosexual, only incidentally homosexual	25
1139	Condition 1	6b	6	b	45	23	Undergraduate University Degree	United Kingdom	North Western European, British or Irish	Female	1- Predominantly heterosexual, only incidentally homosexual	25
1677	Condition 1	6b	6	b	45	23	Other/In college	United States	Other Central or South American or Mixed Race	Female	1- Predominantly heterosexual, only incidentally homosexual	25
263	Condition 1	6b	6	b	50	23	Undergraduate University Degree	Australia	North Western European, British or Irish	Female	1- Predominantly heterosexual, only incidentally homosexual	25
735	Condition 1	6b	6	b	60	23	Undergraduate University Degree	Germany	North Western European, British or Irish	Female	1- Predominantly heterosexual, only incidentally homosexual	25
1626	Condition 1	6b	6	b	60	23	Undergraduate University Degree	United Kingdom	North Western European, British or Irish	Female	1- Predominantly heterosexual, only incidentally homosexual	25
289	Condition 1	6b	6	b	65	23	Undergraduate University Degree	Australia	South East Asian	Female	1- Predominantly heterosexual, only incidentally homosexual	25
297	Condition 1	6b	6	b	70	23	Undergraduate University Degree	Australia	North Western European, British or Irish	Female	1- Predominantly heterosexual, only incidentally homosexual	25
768	Condition 1	6b	6	b	70	23	Diploma	United States	Native American Mixed Race	Female	1- Predominantly heterosexual, only incidentally homosexual	25
732	Condition 1	6b	6	b	35	22	Undergraduate University Degree	United Kingdom	North Western European, British or Irish	Female	1- Predominantly heterosexual, only incidentally homosexual	25
3	Condition 1	6b	6	b	55	22	Undergraduate University Degree	Australia	Southern Asian	Female	1- Predominantly heterosexual, only incidentally homosexual	25
113	Condition 1	6b	6	b	70	22	Undergraduate University Degree	Australia	North Western European, British or Irish	Female	1- Predominantly heterosexual, only incidentally homosexual	25
1411	Condition 1	6b	6	b	70	22	Undergraduate University Degree	United States	North Western European, British or Irish	Female	1- Predominantly heterosexual, only incidentally homosexual	25
224	Condition 1	6b	6	b	50	21	Undergraduate University Degree	Australia	North Western European, British or Irish	Female	1- Predominantly heterosexual, only incidentally homosexual	25
239	Condition 1	6b	6	b	55	21	Undergraduate University Degree	Australia	European Mixed Race	Female	1- Predominantly heterosexual, only incidentally homosexual	25
1734	Condition 1	6b	6	b	80	21	Undergraduate University Degree	Germany	North Western European, British or Irish	Female	1- Predominantly heterosexual, only incidentally homosexual	25
1809	Condition 1	6b	6	b	5	20	Diploma	New Zealand	New Zealand Peoples	Female	1- Predominantly heterosexual, only incidentally homosexual	25
792	Condition 1	6b	6	b	25	20	High School	United States	North Western European, British or Irish	Female	1- Predominantly heterosexual, only incidentally homosexual	25
656	Condition 1	6b	6	b	30	20	High School	Czech Republic	European Mixed Race	Female	1- Predominantly heterosexual, only incidentally homosexual	25
160	Condition 1	6b	6	b	40	20	Undergraduate University Degree	Australia	Chinese Asian	Female	1- Predominantly heterosexual, only incidentally homosexual	25
1311	Condition 1	6b	6	b	40	20	Undergraduate University Degree	United States	None of these define my ethnic group	Female	1- Predominantly heterosexual, only incidentally homosexual	25
213	Condition 1	6b	6	b	45	20	Undergraduate University Degree	Australia	Chinese Asian	Female	1- Predominantly heterosexual, only incidentally homosexual	25
308	Condition 1	6b	6	b	55	20	High School	Australia	Southern Asian	Female	1- Predominantly heterosexual, only incidentally homosexual	25
1055	Condition 1	6b	6	b	55	20	High School	Ireland	North Western European, British or Irish	Female	1- Predominantly heterosexual, only incidentally homosexual	25
722	Condition 1	6b	6	b	60	20	High School	Czech Republic	South Eastern and Eastern European	Female	1- Predominantly heterosexual, only incidentally homosexual	25
1731	Condition 1	6b	6	b	40	19	Undergraduate University Degree	Canada	Chinese Asian	Female	1- Predominantly heterosexual, only incidentally homosexual	25
576	Condition 1	6b	6	b	55	19	High School	United Kingdom	Chinese Asian	Female	1- Predominantly heterosexual, only incidentally homosexual	25
1956	Condition 1	6b	6	b	70	19	High School	United States	European Mixed Race	Female	1- Predominantly heterosexual, only incidentally homosexual	25
1764	Condition 1	6b	6	b	35	18	High School	Other - East European	South Eastern and Eastern European	Female	1- Predominantly heterosexual, only incidentally homosexual	25
738	Condition 1	6b	6	b	65	18	High School	United Kingdom	North Western European, British or Irish	Female	1- Predominantly heterosexual, only incidentally homosexual	25
1223	Condition 1	6b	6	b	75	38	Undergraduate University Degree	United States	European Mixed Race	Female	2- Predominantly heterosexual, but more than incidentally homosexual	25
470	Condition 1	6b	6	b	55	36	Doctorate/PhD	United States	South East Asian	Female	2- Predominantly heterosexual, but more than incidentally homosexual	25
1230	Condition 1	6b	6	b	60	31	Undergraduate University Degree	United States	European Mixed Race	Female	2- Predominantly heterosexual, but more than incidentally homosexual	25
1348	Condition 1	6b	6	b	50	30	Undergraduate University Degree	United States	North Western European, British or Irish	Female	2- Predominantly heterosexual, but more than incidentally homosexual	25
1310	Condition 1	6b	6	b	50	29	Undergraduate University Degree	United States	None of these define my ethnic group	Female	2- Predominantly heterosexual, but more than incidentally homosexual	25
1324	Condition 1	6b	6	b	65	28	Undergraduate University Degree	United States	North Western European, British or Irish	Female	2- Predominantly heterosexual, but more than incidentally homosexual	25
1589	Condition 1	6b	6	b	75	26	Other/Some college	United States	None of these define my ethnic group	Female	2- Predominantly heterosexual, but more than incidentally homosexual	25
1531	Condition 1	6b	6	b	35	23	High School	Netherlands	Southern European	Female	2- Predominantly heterosexual, but more than incidentally homosexual	25
1377	Condition 1	6b	6	b	40	23	Post Graduate University Degree	United States	European Mixed Race	Female	2- Predominantly heterosexual, but more than incidentally homosexual	25
833	Condition 1	6b	6	b	85	22	Undergraduate University Degree	United Kingdom	North Western European, British or Irish	Female	2- Predominantly heterosexual, but more than incidentally homosexual	25
1229	Condition 1	6b	6	b	70	21	High School	New Zealand	European Mixed Race	Female	2- Predominantly heterosexual, but more than incidentally homosexual	25
404	Condition 1	6b	6	b	45	20	High School	United States	None of these define my ethnic group	Female	2- Predominantly heterosexual, but more than incidentally homosexual	25
461	Condition 1	6b	6	b	45	20	High School	Australia	North Western European, British or Irish	Female	2- Predominantly heterosexual, but more than incidentally homosexual	25
511	Condition 1	6b	6	b	55	20	Undergraduate University Degree	United States	North Western European, British or Irish	Female	2- Predominantly heterosexual, but more than incidentally homosexual	25
466	Condition 1	6b	6	b	45	19	High School	Australia	North Western European, British or Irish	Female	2- Predominantly heterosexual, but more than incidentally homosexual	25
423	Condition 1	6b	6	b	55	19	High School	United States	Other Asian or Mixed Race Asian	Female	2- Predominantly heterosexual, but more than incidentally homosexual	25
1206	Condition 1	6b	6	b	80	35	Post Graduate University Degree	United States	None of these define my ethnic group	Female	3- Equally heterosexual and homosexual	25
395	Condition 1	6b	6	b	55	33	Post Graduate University Degree	United States	None of these define my ethnic group	Female	3- Equally heterosexual and homosexual	25
1264	Condition 1	6b	6	b	65	30	Other/Two Associate's Degrees, 6 credits away from a Bachelor's Degree	United States	European Mixed Race	Female	3- Equally heterosexual and homosexual	25
1240	Condition 1	6b	6	b	55	24	Diploma	Canada	North Western European, British or Irish	Female	3- Equally heterosexual and homosexual	25
977	Condition 1	6b	6	b	40	23	High School	United States	North Western European, British or Irish	Female	3- Equally heterosexual and homosexual	25
542	Condition 1	6b	6	b	85	23	Other/High school plus coaching certifications	Canada	North Western European, British or Irish	Female	3- Equally heterosexual and homosexual	25
605	Condition 1	6b	6	b	50	20	Diploma	United States	European Mixed Race	Female	3- Equally heterosexual and homosexual	25
1053	Condition 1	6c	6	c	55	51	Undergraduate University Degree	United States	South Eastern and Eastern European	Female	0- Exclusively heterosexual with no homosexual	25
278	Condition 1	6c	6	c	45	49	Diploma	Australia	Mixed Race Australian	Female	0- Exclusively heterosexual with no homosexual	25
267	Condition 1	6c	6	c	80	47	Post Graduate University Degree	Australia	North Western European, British or Irish	Female	0- Exclusively heterosexual with no homosexual	25
1399	Condition 1	6c	6	c	50	45	Undergraduate University Degree	United States	North Western European, British or Irish	Female	0- Exclusively heterosexual with no homosexual	25
579	Condition 1	6c	6	c	70	45	Undergraduate University Degree	United States	North Western European, British or Irish	Female	0- Exclusively heterosexual with no homosexual	25
1245	Condition 1	6c	6	c	75	45	Post Graduate University Degree	United Arab Emirates	Other Central or South American or Mixed Race	Female	0- Exclusively heterosexual with no homosexual	25
1480	Condition 1	6c	6	c	35	44	Undergraduate University Degree	United States	North Western European, British or Irish	Female	0- Exclusively heterosexual with no homosexual	25
309	Condition 1	6c	6	c	55	40	Undergraduate University Degree	Australia	North Western European, British or Irish	Female	0- Exclusively heterosexual with no homosexual	25
513	Condition 1	6c	6	c	70	40	High School	Australia	North Western European, British or Irish	Female	0- Exclusively heterosexual with no homosexual	25
830	Condition 1	6c	6	c	90	40	Doctorate/PhD	United States	North Western European, British or Irish	Female	0- Exclusively heterosexual with no homosexual	25
1613	Condition 1	6c	6	c	45	39	Diploma	United Kingdom	North Western European, British or Irish	Female	0- Exclusively heterosexual with no homosexual	25
1605	Condition 1	6c	6	c	70	38	Doctorate/PhD	United States	European Mixed Race	Female	0- Exclusively heterosexual with no homosexual	25
1884	Condition 1	6c	6	c	45	37	Undergraduate University Degree	United States	South Eastern and Eastern European	Female	0- Exclusively heterosexual with no homosexual	25
1129	Condition 1	6c	6	c	30	36	Undergraduate University Degree	United States	None of these define my ethnic group	Female	0- Exclusively heterosexual with no homosexual	25
1834	Condition 1	6c	6	c	50	36	Post Graduate University Degree	United Arab Emirates	South American	Female	0- Exclusively heterosexual with no homosexual	25
1897	Condition 1	6c	6	c	70	36	Post Graduate University Degree	United States	European Mixed Race	Female	0- Exclusively heterosexual with no homosexual	25
639	Condition 1	6c	6	c	40	35	Diploma	United Kingdom	None of these define my ethnic group	Female	0- Exclusively heterosexual with no homosexual	25
960	Condition 1	6c	6	c	70	35	Undergraduate University Degree	United States	North Western European, British or Irish	Female	0- Exclusively heterosexual with no homosexual	25
327	Condition 1	6c	6	c	50	34	High School	Belgium	North Western European, British or Irish	Female	0- Exclusively heterosexual with no homosexual	25
1417	Condition 1	6c	6	c	30	33	Post Graduate University Degree	Other - Southern America	None of these define my ethnic group	Female	0- Exclusively heterosexual with no homosexual	25
927	Condition 1	6c	6	c	40	31	Undergraduate University Degree	United Kingdom	South Eastern and Eastern European	Female	0- Exclusively heterosexual with no homosexual	25
1145	Condition 1	6c	6	c	50	31	Undergraduate University Degree	United States	None of these define my ethnic group	Female	0- Exclusively heterosexual with no homosexual	25
963	Condition 1	6c	6	c	65	31	Post Graduate University Degree	United Kingdom	North Western European, British or Irish	Female	0- Exclusively heterosexual with no homosexual	25
856	Condition 1	6c	6	c	75	31	Doctorate/PhD	Ireland	North Western European, British or Irish	Female	0- Exclusively heterosexual with no homosexual	25
1685	Condition 1	6c	6	c	75	31	Post Graduate University Degree	United States	European Mixed Race	Female	0- Exclusively heterosexual with no homosexual	25
1349	Condition 1	6c	6	c	80	31	Undergraduate University Degree	Germany	North Western European, British or Irish	Female	0- Exclusively heterosexual with no homosexual	25
968	Condition 1	6c	6	c	45	30	Post Graduate University Degree	Brazil	South American	Female	0- Exclusively heterosexual with no homosexual	25
1202	Condition 1	6c	6	c	45	30	Undergraduate University Degree	United States	North Western European, British or Irish	Female	0- Exclusively heterosexual with no homosexual	25
1984	Condition 1	6c	6	c	55	30	Undergraduate University Degree	Other - Southern America	Central American	Female	0- Exclusively heterosexual with no homosexual	25
11	Condition 1	6c	6	c	30	29	Post Graduate University Degree	United States	Native North American or First Nation	Female	0- Exclusively heterosexual with no homosexual	25
708	Condition 1	6c	6	c	85	29	Undergraduate University Degree	United States	European Mixed Race	Female	0- Exclusively heterosexual with no homosexual	25
1986	Condition 1	6c	6	c	40	28	Doctorate/PhD	United Kingdom	Southern and East Africa	Female	0- Exclusively heterosexual with no homosexual	25
556	Condition 1	6c	6	c	45	28	Doctorate/PhD	United States	Other Central or South American or Mixed Race	Female	0- Exclusively heterosexual with no homosexual	25
935	Condition 1	6c	6	c	50	28	Undergraduate University Degree	Poland	South Eastern and Eastern European	Female	0- Exclusively heterosexual with no homosexual	25
1215	Condition 1	6c	6	c	75	27	Undergraduate University Degree	Germany	North Western European, British or Irish	Female	0- Exclusively heterosexual with no homosexual	25
1170	Condition 1	6c	6	c	50	26	Undergraduate University Degree	Italy	Southern European	Female	0- Exclusively heterosexual with no homosexual	25
1341	Condition 1	6c	6	c	50	26	High School	Canada	European Mixed Race	Female	0- Exclusively heterosexual with no homosexual	25
900	Condition 1	6c	6	c	10	25	Diploma	United Kingdom	None of these define my ethnic group	Female	0- Exclusively heterosexual with no homosexual	25
1908	Condition 1	6c	6	c	65	25	Post Graduate University Degree	United States	European Mixed Race	Female	0- Exclusively heterosexual with no homosexual	25
1995	Condition 1	6c	6	c	80	25	Undergraduate University Degree	United States	None of these define my ethnic group	Female	0- Exclusively heterosexual with no homosexual	25
600	Condition 1	6c	6	c	65	24	Post Graduate University Degree	Other - Asia	None of these define my ethnic group	Female	0- Exclusively heterosexual with no homosexual	25
725	Condition 1	6c	6	c	65	24	Undergraduate University Degree	United States	Chinese Asian	Female	0- Exclusively heterosexual with no homosexual	25
560	Condition 1	6c	6	c	75	24	Undergraduate University Degree	Other - Middle East	European Mixed Race	Female	0- Exclusively heterosexual with no homosexual	25
925	Condition 1	6c	6	c	50	23	Undergraduate University Degree	Portugal	Southern European	Female	0- Exclusively heterosexual with no homosexual	25
1332	Condition 1	6c	6	c	60	23	Undergraduate University Degree	Germany	European Mixed Race	Female	0- Exclusively heterosexual with no homosexual	25
860	Condition 1	6c	6	c	65	22	High School	Sweden	European Mixed Race	Female	0- Exclusively heterosexual with no homosexual	25
1578	Condition 1	6c	6	c	80	22	Undergraduate University Degree	United States	European Mixed Race	Female	0- Exclusively heterosexual with no homosexual	25
527	Condition 1	6c	6	c	50	21	Undergraduate University Degree	United States	European Mixed Race	Female	0- Exclusively heterosexual with no homosexual	25
1647	Condition 1	6c	6	c	55	21	Undergraduate University Degree	United Kingdom	North Western European, British or Irish	Female	0- Exclusively heterosexual with no homosexual	25
1280	Condition 1	6c	6	c	60	21	Undergraduate University Degree	United States	European Mixed Race	Female	0- Exclusively heterosexual with no homosexual	25
983	Condition 1	6c	6	c	65	21	Undergraduate University Degree	United States	European Mixed Race	Female	0- Exclusively heterosexual with no homosexual	25
1491	Condition 1	6c	6	c	40	20	Undergraduate University Degree	Brazil	South American	Female	0- Exclusively heterosexual with no homosexual	25
908	Condition 1	6c	6	c	30	19	Undergraduate University Degree	United Kingdom	European Mixed Race	Female	0- Exclusively heterosexual with no homosexual	25
1027	Condition 1	6c	6	c	40	19	Undergraduate University Degree	South Africa	North Western European, British or Irish	Female	0- Exclusively heterosexual with no homosexual	25
212	Condition 1	6c	6	c	90	19	Undergraduate University Degree	Australia	European Mixed Race	Female	0- Exclusively heterosexual with no homosexual	25
575	Condition 1	6c	6	c	15	18	Diploma	Isreal	South Eastern and Eastern European	Female	0- Exclusively heterosexual with no homosexual	25
1678	Condition 1	6c	6	c	60	18	High School	United States	North Western European, British or Irish	Female	0- Exclusively heterosexual with no homosexual	25
649	Condition 1	6c	6	c	65	18	High School	Australia	North Western European, British or Irish	Female	0- Exclusively heterosexual with no homosexual	25
261	Condition 1	6c	6	c	40	40	Post Graduate University Degree	Australia	North Western European, British or Irish	Female	1- Predominantly heterosexual, only incidentally homosexual	25
1316	Condition 1	6c	6	c	45	40	Undergraduate University Degree	Canada	European Mixed Race	Female	1- Predominantly heterosexual, only incidentally homosexual	25
1747	Condition 1	6c	6	c	55	38	Undergraduate University Degree	United States	South Eastern and Eastern European	Female	1- Predominantly heterosexual, only incidentally homosexual	25
865	Condition 1	6c	6	c	65	36	Undergraduate University Degree	Denmark	European Mixed Race	Female	1- Predominantly heterosexual, only incidentally homosexual	25
379	Condition 1	6c	6	c	40	33	High School	Argentina	South American	Female	1- Predominantly heterosexual, only incidentally homosexual	25
1361	Condition 1	6c	6	c	45	33	Other/Attending college	United States	European Mixed Race	Female	1- Predominantly heterosexual, only incidentally homosexual	25
728	Condition 1	6c	6	c	40	32	Doctorate/PhD	Germany	North Western European, British or Irish	Female	1- Predominantly heterosexual, only incidentally homosexual	25
1617	Condition 1	6c	6	c	50	32	Diploma	Canada	North Western European, British or Irish	Female	1- Predominantly heterosexual, only incidentally homosexual	25
1150	Condition 1	6c	6	c	55	30	Diploma	United States	North Western European, British or Irish	Female	1- Predominantly heterosexual, only incidentally homosexual	25
1407	Condition 1	6c	6	c	55	30	Undergraduate University Degree	United States	European Mixed Race	Female	1- Predominantly heterosexual, only incidentally homosexual	25
1290	Condition 1	6c	6	c	65	30	Other/Trade School	United States	South Eastern and Eastern European	Female	1- Predominantly heterosexual, only incidentally homosexual	25
302	Condition 1	6c	6	c	30	29	Undergraduate University Degree	Australia	Mixed Race Australian	Female	1- Predominantly heterosexual, only incidentally homosexual	25
1964	Condition 1	6c	6	c	55	29	High School	United States	European Mixed Race	Female	1- Predominantly heterosexual, only incidentally homosexual	25
931	Condition 1	6c	6	c	65	29	Post Graduate University Degree	Australia	North Western European, British or Irish	Female	1- Predominantly heterosexual, only incidentally homosexual	25
1642	Condition 1	6c	6	c	35	27	High School	Austria	European Mixed Race	Female	1- Predominantly heterosexual, only incidentally homosexual	25
441	Condition 1	6c	6	c	45	27	Undergraduate University Degree	United Kingdom	North Western European, British or Irish	Female	1- Predominantly heterosexual, only incidentally homosexual	25
1624	Condition 1	6c	6	c	90	27	Post Graduate University Degree	Chile	European Mixed Race	Female	1- Predominantly heterosexual, only incidentally homosexual	25
1373	Condition 1	6c	6	c	10	26	High School	United States	North Western European, British or Irish	Female	1- Predominantly heterosexual, only incidentally homosexual	25
731	Condition 1	6c	6	c	65	26	Undergraduate University Degree	Italy	North Western European, British or Irish	Female	1- Predominantly heterosexual, only incidentally homosexual	25
986	Condition 1	6c	6	c	30	25	Undergraduate University Degree	United States	North African or Middle Eastern Arab	Female	1- Predominantly heterosexual, only incidentally homosexual	25
2007	Condition 1	6c	6	c	40	25	Undergraduate University Degree	Canada	North Western European, British or Irish	Female	1- Predominantly heterosexual, only incidentally homosexual	25
393	Condition 1	6c	6	c	70	25	Undergraduate University Degree	Brazil	Other Central or South American or Mixed Race	Female	1- Predominantly heterosexual, only incidentally homosexual	25
785	Condition 1	6c	6	c	80	25	Undergraduate University Degree	Norway	North Western European, British or Irish	Female	1- Predominantly heterosexual, only incidentally homosexual	25
620	Condition 1	6c	6	c	25	24	Post Graduate University Degree	United States	European Mixed Race	Female	1- Predominantly heterosexual, only incidentally homosexual	25
311	Condition 1	6c	6	c	45	24	Undergraduate University Degree	Australia	North Western European, British or Irish	Female	1- Predominantly heterosexual, only incidentally homosexual	25
1252	Condition 1	6c	6	c	75	24	Undergraduate University Degree	Canada	North Western European, British or Irish	Female	1- Predominantly heterosexual, only incidentally homosexual	25
1889	Condition 1	6c	6	c	50	23	Doctorate/PhD	United States	Southern Asian	Female	1- Predominantly heterosexual, only incidentally homosexual	25
20	Condition 1	6c	6	c	55	23	Undergraduate University Degree	Australia	South East Asian	Female	1- Predominantly heterosexual, only incidentally homosexual	25
1861	Condition 1	6c	6	c	75	23	Undergraduate University Degree	Spain	North Western European, British or Irish	Female	1- Predominantly heterosexual, only incidentally homosexual	25
17	Condition 1	6c	6	c	70	22	Post Graduate University Degree	South Africa	North Western European, British or Irish	Female	1- Predominantly heterosexual, only incidentally homosexual	25
211	Condition 1	6c	6	c	5	21	Undergraduate University Degree	Australia	Chinese Asian	Female	1- Predominantly heterosexual, only incidentally homosexual	25
1999	Condition 1	6c	6	c	45	21	High School	Canada	None of these define my ethnic group	Female	1- Predominantly heterosexual, only incidentally homosexual	25
813	Condition 1	6c	6	c	35	20	Undergraduate University Degree	Ireland	North Western European, British or Irish	Female	1- Predominantly heterosexual, only incidentally homosexual	25
1639	Condition 1	6c	6	c	45	20	Undergraduate University Degree	United States	European Mixed Race	Female	1- Predominantly heterosexual, only incidentally homosexual	25
452	Condition 1	6c	6	c	50	20	High School	Other - East European	South Eastern and Eastern European	Female	1- Predominantly heterosexual, only incidentally homosexual	25
448	Condition 1	6c	6	c	45	19	Undergraduate University Degree	United States	Native North American or First Nation	Female	1- Predominantly heterosexual, only incidentally homosexual	25
1802	Condition 1	6c	6	c	30	18	High School	Canada	North Western European, British or Irish	Female	1- Predominantly heterosexual, only incidentally homosexual	25
1562	Condition 1	6c	6	c	60	18	High School	Germany	Southern European	Female	1- Predominantly heterosexual, only incidentally homosexual	25
429	Condition 1	6c	6	c	70	18	High School	Mexico	Central American	Female	1- Predominantly heterosexual, only incidentally homosexual	25
880	Condition 1	6c	6	c	45	38	Post Graduate University Degree	United States	North Western European, British or Irish	Female	2- Predominantly heterosexual, but more than incidentally homosexual	25
1098	Condition 1	6c	6	c	75	34	Undergraduate University Degree	United States	European Mixed Race	Female	2- Predominantly heterosexual, but more than incidentally homosexual	25
799	Condition 1	6c	6	c	35	32	Undergraduate University Degree	United States	Central American	Female	2- Predominantly heterosexual, but more than incidentally homosexual	25
1493	Condition 1	6c	6	c	55	29	High School	Mexico	Other Central or South American or Mixed Race	Female	2- Predominantly heterosexual, but more than incidentally homosexual	25
1865	Condition 1	6c	6	c	50	26	Post Graduate University Degree	United Kingdom	South East Asian	Female	2- Predominantly heterosexual, but more than incidentally homosexual	25
1122	Condition 1	6c	6	c	30	25	Undergraduate University Degree	United States	European Mixed Race	Female	2- Predominantly heterosexual, but more than incidentally homosexual	25
147	Condition 1	6c	6	c	70	24	Undergraduate University Degree	Australia	North Western European, British or Irish	Female	2- Predominantly heterosexual, but more than incidentally homosexual	25
1024	Condition 1	6c	6	c	55	23	Undergraduate University Degree	United States	North Western European, British or Irish	Female	2- Predominantly heterosexual, but more than incidentally homosexual	25
1593	Condition 1	6c	6	c	60	22	Diploma	United States	North Western European, British or Irish	Female	2- Predominantly heterosexual, but more than incidentally homosexual	25
1662	Condition 1	6c	6	c	60	21	Undergraduate University Degree	United States	European Mixed Race	Female	2- Predominantly heterosexual, but more than incidentally homosexual	25
924	Condition 1	6c	6	c	20	20	Undergraduate University Degree	United Kingdom	North Western European, British or Irish	Female	2- Predominantly heterosexual, but more than incidentally homosexual	25
230	Condition 1	6c	6	c	50	20	Undergraduate University Degree	Australia	Mixed Race Australian	Female	2- Predominantly heterosexual, but more than incidentally homosexual	25
1175	Condition 1	6c	6	c	65	20	High School	United States	None of these define my ethnic group	Female	2- Predominantly heterosexual, but more than incidentally homosexual	25
1400	Condition 1	6c	6	c	20	18	High School	Chile	European Mixed Race	Female	2- Predominantly heterosexual, but more than incidentally homosexual	25
703	Condition 1	6c	6	c	80	40	Diploma	United States	None of these define my ethnic group	Female	3- Equally heterosexual and homosexual	25
1863	Condition 1	6c	6	c	70	37	Post Graduate University Degree	United States	South Eastern and Eastern European	Female	3- Equally heterosexual and homosexual	25
418	Condition 1	6c	6	c	50	32	Undergraduate University Degree	United States	European Mixed Race	Female	3- Equally heterosexual and homosexual	25
516	Condition 1	6c	6	c	50	27	Diploma	Serbia	Southern European	Female	3- Equally heterosexual and homosexual	25
372	Condition 1	6c	6	c	60	25	Post Graduate University Degree	Australia	North Western European, British or Irish	Female	3- Equally heterosexual and homosexual	25
43	Condition 1	6c	6	c	65	22	Undergraduate University Degree	Australia	South East Asian	Female	3- Equally heterosexual and homosexual	25
1262	Condition 1	6c	6	c	65	20	Undergraduate University Degree	Netherlands	None of these define my ethnic group	Female	3- Equally heterosexual and homosexual	25
1053	Condition 1	7a	7	a	80	51	Undergraduate University Degree	United States	South Eastern and Eastern European	Female	0- Exclusively heterosexual with no homosexual	42
278	Condition 1	7a	7	a	70	49	Diploma	Australia	Mixed Race Australian	Female	0- Exclusively heterosexual with no homosexual	42
1399	Condition 1	7a	7	a	65	45	Undergraduate University Degree	United States	North Western European, British or Irish	Female	0- Exclusively heterosexual with no homosexual	42
1052	Condition 1	7a	7	a	45	42	Other/3 years college	United States	European Mixed Race	Female	0- Exclusively heterosexual with no homosexual	42
1892	Condition 1	7a	7	a	45	39	Post Graduate University Degree	Other - Southern America	Other Central or South American or Mixed Race	Female	0- Exclusively heterosexual with no homosexual	42
673	Condition 1	7a	7	a	50	38	Post Graduate University Degree	Sweden	North Western European, British or Irish	Female	0- Exclusively heterosexual with no homosexual	42
1605	Condition 1	7a	7	a	90	38	Doctorate/PhD	United States	European Mixed Race	Female	0- Exclusively heterosexual with no homosexual	42
1834	Condition 1	7a	7	a	60	36	Post Graduate University Degree	United Arab Emirates	South American	Female	0- Exclusively heterosexual with no homosexual	42
1897	Condition 1	7a	7	a	70	36	Post Graduate University Degree	United States	European Mixed Race	Female	0- Exclusively heterosexual with no homosexual	42
1484	Condition 1	7a	7	a	75	33	Other/some college	United States	None of these define my ethnic group	Female	0- Exclusively heterosexual with no homosexual	42
494	Condition 1	7a	7	a	80	32	Post Graduate University Degree	Isreal	None of these define my ethnic group	Female	0- Exclusively heterosexual with no homosexual	42
124	Condition 1	7a	7	a	40	31	Undergraduate University Degree	Australia	European Mixed Race	Female	0- Exclusively heterosexual with no homosexual	42
1145	Condition 1	7a	7	a	50	31	Undergraduate University Degree	United States	None of these define my ethnic group	Female	0- Exclusively heterosexual with no homosexual	42
923	Condition 1	7a	7	a	80	31	Undergraduate University Degree	Isreal	South American	Female	0- Exclusively heterosexual with no homosexual	42
1984	Condition 1	7a	7	a	50	30	Undergraduate University Degree	Other - Southern America	Central American	Female	0- Exclusively heterosexual with no homosexual	42
708	Condition 1	7a	7	a	70	29	Undergraduate University Degree	United States	European Mixed Race	Female	0- Exclusively heterosexual with no homosexual	42
1986	Condition 1	7a	7	a	50	28	Doctorate/PhD	United Kingdom	Southern and East Africa	Female	0- Exclusively heterosexual with no homosexual	42
556	Condition 1	7a	7	a	55	28	Doctorate/PhD	United States	Other Central or South American or Mixed Race	Female	0- Exclusively heterosexual with no homosexual	42
587	Condition 1	7a	7	a	70	28	Post Graduate University Degree	Australia	North Western European, British or Irish	Female	0- Exclusively heterosexual with no homosexual	42
314	Condition 1	7a	7	a	85	28	Undergraduate University Degree	Australia	Chinese Asian	Female	0- Exclusively heterosexual with no homosexual	42
1342	Condition 1	7a	7	a	90	28	Post Graduate University Degree	United States	European Mixed Race	Female	0- Exclusively heterosexual with no homosexual	42
632	Condition 1	7a	7	a	70	27	Post Graduate University Degree	France	North Western European, British or Irish	Female	0- Exclusively heterosexual with no homosexual	42
1072	Condition 1	7a	7	a	70	27	Diploma	Portugal	None of these define my ethnic group	Female	0- Exclusively heterosexual with no homosexual	42
1215	Condition 1	7a	7	a	75	27	Undergraduate University Degree	Germany	North Western European, British or Irish	Female	0- Exclusively heterosexual with no homosexual	42
137	Condition 1	7a	7	a	45	26	Diploma	Australia	Mixed Race Australian	Female	0- Exclusively heterosexual with no homosexual	42
1170	Condition 1	7a	7	a	60	26	Undergraduate University Degree	Italy	Southern European	Female	0- Exclusively heterosexual with no homosexual	42
1341	Condition 1	7a	7	a	60	26	High School	Canada	European Mixed Race	Female	0- Exclusively heterosexual with no homosexual	42
1338	Condition 1	7a	7	a	65	26	Post Graduate University Degree	Chile	South American	Female	0- Exclusively heterosexual with no homosexual	42
439	Condition 1	7a	7	a	35	24	Undergraduate University Degree	Taiwan	Chinese Asian	Female	0- Exclusively heterosexual with no homosexual	42
1854	Condition 1	7a	7	a	65	24	High School	United Kingdom	North Western European, British or Irish	Female	0- Exclusively heterosexual with no homosexual	42
476	Condition 1	7a	7	a	75	24	Undergraduate University Degree	United States	European Mixed Race	Female	0- Exclusively heterosexual with no homosexual	42
925	Condition 1	7a	7	a	60	23	Undergraduate University Degree	Portugal	Southern European	Female	0- Exclusively heterosexual with no homosexual	42
1546	Condition 1	7a	7	a	60	23	Undergraduate University Degree	United Kingdom	North Western European, British or Irish	Female	0- Exclusively heterosexual with no homosexual	42
1334	Condition 1	7a	7	a	65	22	Undergraduate University Degree	Hungary	South Eastern and Eastern European	Female	0- Exclusively heterosexual with no homosexual	42
376	Condition 1	7a	7	a	40	21	Undergraduate University Degree	United States	European Mixed Race	Female	0- Exclusively heterosexual with no homosexual	42
983	Condition 1	7a	7	a	40	21	Undergraduate University Degree	United States	European Mixed Race	Female	0- Exclusively heterosexual with no homosexual	42
1623	Condition 1	7a	7	a	50	21	Undergraduate University Degree	Other - Middle East	South East Asian	Female	0- Exclusively heterosexual with no homosexual	42
1647	Condition 1	7a	7	a	70	21	Undergraduate University Degree	United Kingdom	North Western European, British or Irish	Female	0- Exclusively heterosexual with no homosexual	42
1491	Condition 1	7a	7	a	45	20	Undergraduate University Degree	Brazil	South American	Female	0- Exclusively heterosexual with no homosexual	42
304	Condition 1	7a	7	a	60	20	Undergraduate University Degree	Malaysia	Chinese Asian	Female	0- Exclusively heterosexual with no homosexual	42
1910	Condition 1	7a	7	a	45	19	Diploma	Netherlands	South Eastern and Eastern European	Female	0- Exclusively heterosexual with no homosexual	42
323	Condition 1	7a	7	a	55	19	Undergraduate University Degree	Australia	North Western European, British or Irish	Female	0- Exclusively heterosexual with no homosexual	42
363	Condition 1	7a	7	a	65	19	High School	Australia	Other North-East Asian	Female	0- Exclusively heterosexual with no homosexual	42
575	Condition 1	7a	7	a	40	18	Diploma	Isreal	South Eastern and Eastern European	Female	0- Exclusively heterosexual with no homosexual	42
1943	Condition 1	7a	7	a	40	18	High School	United States	North Western European, British or Irish	Female	0- Exclusively heterosexual with no homosexual	42
226	Condition 1	7a	7	a	70	18	Undergraduate University Degree	Australia	South Eastern and Eastern European	Female	0- Exclusively heterosexual with no homosexual	42
151	Condition 1	7a	7	a	85	18	Undergraduate University Degree	Australia	Southern Asian	Female	0- Exclusively heterosexual with no homosexual	42
1292	Condition 1	7a	7	a	90	18	High School	Portugal	Southern European	Female	0- Exclusively heterosexual with no homosexual	42
1141	Condition 1	7a	7	a	55	47	Undergraduate University Degree	United States	North Western European, British or Irish	Female	1- Predominantly heterosexual, only incidentally homosexual	42
1971	Condition 1	7a	7	a	50	37	Post Graduate University Degree	United States	South Eastern and Eastern European	Female	1- Predominantly heterosexual, only incidentally homosexual	42
378	Condition 1	7a	7	a	40	36	Post Graduate University Degree	United States	North Western European, British or Irish	Female	1- Predominantly heterosexual, only incidentally homosexual	42
1441	Condition 1	7a	7	a	60	36	Undergraduate University Degree	Canada	Caribbean Islander	Female	1- Predominantly heterosexual, only incidentally homosexual	42
1990	Condition 1	7a	7	a	45	33	Other/Associates Degree in Nursing	United States	European Mixed Race	Female	1- Predominantly heterosexual, only incidentally homosexual	42
895	Condition 1	7a	7	a	15	32	Undergraduate University Degree	Spain	Southern European	Female	1- Predominantly heterosexual, only incidentally homosexual	42
1127	Condition 1	7a	7	a	50	32	Undergraduate University Degree	United States	None of these define my ethnic group	Female	1- Predominantly heterosexual, only incidentally homosexual	42
970	Condition 1	7a	7	a	55	31	High School	Isreal	North African or Middle Eastern Jewish	Female	1- Predominantly heterosexual, only incidentally homosexual	42
1177	Condition 1	7a	7	a	55	31	Post Graduate University Degree	United States	European Mixed Race	Female	1- Predominantly heterosexual, only incidentally homosexual	42
949	Condition 1	7a	7	a	80	31	Undergraduate University Degree	United States	None of these define my ethnic group	Female	1- Predominantly heterosexual, only incidentally homosexual	42
1407	Condition 1	7a	7	a	40	30	Undergraduate University Degree	United States	European Mixed Race	Female	1- Predominantly heterosexual, only incidentally homosexual	42
[truncated: 7,331 more rows]

## Sheet: Female Status
Subject	Condition	Model	Model ID	Treatment	Earnings	Participant Age	Educational Level	Country of Residence	Ethnicity	Participant Sex	Kinsey Scale	Model Age	Model age2
1022	Condition 3	2a	2	a	40	28	Post Graduate University Degree	New Zealand	North Western European, British or Irish	Female	1- Predominantly heterosexual, only incidentally homosexual	24	576
1022	Condition 3	4a	4	a	60	28	Post Graduate University Degree	New Zealand	North Western European, British or Irish	Female	1- Predominantly heterosexual, only incidentally homosexual	43	1849
1022	Condition 3	9a	9	a	55	28	Post Graduate University Degree	New Zealand	North Western European, British or Irish	Female	1- Predominantly heterosexual, only incidentally homosexual	34	1156
1022	Condition 3	12a	12	a	65	28	Post Graduate University Degree	New Zealand	North Western European, British or Irish	Female	1- Predominantly heterosexual, only incidentally homosexual	30	900
1022	Condition 3	14a	14	a	45	28	Post Graduate University Degree	New Zealand	North Western European, British or Irish	Female	1- Predominantly heterosexual, only incidentally homosexual	58	3364
1022	Condition 3	16a	16	a	60	28	Post Graduate University Degree	New Zealand	North Western European, British or Irish	Female	1- Predominantly heterosexual, only incidentally homosexual	42	1764
1022	Condition 3	18a	18	a	25	28	Post Graduate University Degree	New Zealand	North Western European, British or Irish	Female	1- Predominantly heterosexual, only incidentally homosexual	23	529
1022	Condition 3	1b	1	b	65	28	Post Graduate University Degree	New Zealand	North Western European, British or Irish	Female	1- Predominantly heterosexual, only incidentally homosexual	32	1024
1022	Condition 3	5b	5	b	45	28	Post Graduate University Degree	New Zealand	North Western European, British or Irish	Female	1- Predominantly heterosexual, only incidentally homosexual	29	841
1022	Condition 3	8b	8	b	55	28	Post Graduate University Degree	New Zealand	North Western European, British or Irish	Female	1- Predominantly heterosexual, only incidentally homosexual	60	3600
1022	Condition 3	13b	13	b	55	28	Post Graduate University Degree	New Zealand	North Western European, British or Irish	Female	1- Predominantly heterosexual, only incidentally homosexual	61	3721
1022	Condition 3	6c	6	c	65	28	Post Graduate University Degree	New Zealand	North Western European, British or Irish	Female	1- Predominantly heterosexual, only incidentally homosexual	25	625
1022	Condition 3	7c	7	c	85	28	Post Graduate University Degree	New Zealand	North Western European, British or Irish	Female	1- Predominantly heterosexual, only incidentally homosexual	42	1764
1022	Condition 3	10c	10	c	20	28	Post Graduate University Degree	New Zealand	North Western European, British or Irish	Female	1- Predominantly heterosexual, only incidentally homosexual	34	1156
1022	Condition 3	15c	15	c	25	28	Post Graduate University Degree	New Zealand	North Western European, British or Irish	Female	1- Predominantly heterosexual, only incidentally homosexual	22	484
262	Condition 3	8a	8	a	25	28	Post Graduate University Degree	Australia	North Western European, British or Irish	Male	0- Exclusively heterosexual with no homosexual	60	3600
262	Condition 3	9a	9	a	75	28	Post Graduate University Degree	Australia	North Western European, British or Irish	Male	0- Exclusively heterosexual with no homosexual	34	1156
262	Condition 3	13a	13	a	80	28	Post Graduate University Degree	Australia	North Western European, British or Irish	Male	0- Exclusively heterosexual with no homosexual	61	3721
262	Condition 3	15a	15	a	55	28	Post Graduate University Degree	Australia	North Western European, British or Irish	Male	0- Exclusively heterosexual with no homosexual	22	484
162	Condition 3	1a	1	a	55	18	Undergraduate University Degree	Australia	South East Asian	Female	0- Exclusively heterosexual with no homosexual	32	1024
162	Condition 3	5a	5	a	80	18	Undergraduate University Degree	Australia	South East Asian	Female	0- Exclusively heterosexual with no homosexual	29	841
162	Condition 3	8a	8	a	50	18	Undergraduate University Degree	Australia	South East Asian	Female	0- Exclusively heterosexual with no homosexual	60	3600
162	Condition 3	13a	13	a	75	18	Undergraduate University Degree	Australia	South East Asian	Female	0- Exclusively heterosexual with no homosexual	61	3721
66	Condition 3	5a	5	a	40	28	Doctorate/PhD	Other - Middle East	None of these define my ethnic group	Male	0- Exclusively heterosexual with no homosexual	29	841
66	Condition 3	6a	6	a	50	28	Doctorate/PhD	Other - Middle East	None of these define my ethnic group	Male	0- Exclusively heterosexual with no homosexual	25	625
66	Condition 3	7a	7	a	70	28	Doctorate/PhD	Other - Middle East	None of these define my ethnic group	Male	0- Exclusively heterosexual with no homosexual	42	1764
66	Condition 3	9a	9	a	65	28	Doctorate/PhD	Other - Middle East	None of these define my ethnic group	Male	0- Exclusively heterosexual with no homosexual	34	1156
66	Condition 3	12a	12	a	50	28	Doctorate/PhD	Other - Middle East	None of these define my ethnic group	Male	0- Exclusively heterosexual with no homosexual	30	900
66	Condition 3	13a	13	a	75	28	Doctorate/PhD	Other - Middle East	None of these define my ethnic group	Male	0- Exclusively heterosexual with no homosexual	61	3721
2	Condition 3	2a	2	a	60	18	Other/ University of hard knocks	Argentina	Other Oceanian Peoples	Male	3- Equally heterosexual and homosexual	24	576
2	Condition 3	12a	12	a	45	18	Other/ University of hard knocks	Argentina	Other Oceanian Peoples	Male	3- Equally heterosexual and homosexual	30	900
2	Condition 3	16a	16	a	80	18	Other/ University of hard knocks	Argentina	Other Oceanian Peoples	Male	3- Equally heterosexual and homosexual	42	1764
262	Condition 3	2b	2	b	40	18	Post Graduate University Degree	Australia	North Western European, British or Irish	Male	0- Exclusively heterosexual with no homosexual	24	576
262	Condition 3	4b	4	b	80	18	Post Graduate University Degree	Australia	North Western European, British or Irish	Male	0- Exclusively heterosexual with no homosexual	43	1849
262	Condition 3	7b	7	b	55	18	Post Graduate University Degree	Australia	North Western European, British or Irish	Male	0- Exclusively heterosexual with no homosexual	42	1764
262	Condition 3	10b	10	b	65	18	Post Graduate University Degree	Australia	North Western European, British or Irish	Male	0- Exclusively heterosexual with no homosexual	34	1156
262	Condition 3	12b	12	b	45	18	Post Graduate University Degree	Australia	North Western European, British or Irish	Male	0- Exclusively heterosexual with no homosexual	30	900
162	Condition 3	7b	7	b	60	18	Undergraduate University Degree	Australia	South East Asian	Female	0- Exclusively heterosexual with no homosexual	42	1764
162	Condition 3	12b	12	b	70	18	Undergraduate University Degree	Australia	South East Asian	Female	0- Exclusively heterosexual with no homosexual	30	900
162	Condition 3	16b	16	b	65	18	Undergraduate University Degree	Australia	South East Asian	Female	0- Exclusively heterosexual with no homosexual	42	1764
162	Condition 3	18b	18	b	75	18	Undergraduate University Degree	Australia	South East Asian	Female	0- Exclusively heterosexual with no homosexual	23	529
66	Condition 3	1b	1	b	55	28	Doctorate/PhD	Other - Middle East	None of these define my ethnic group	Male	0- Exclusively heterosexual with no homosexual	32	1024
66	Condition 3	2b	2	b	40	28	Doctorate/PhD	Other - Middle East	None of these define my ethnic group	Male	0- Exclusively heterosexual with no homosexual	24	576
66	Condition 3	10b	10	b	60	28	Doctorate/PhD	Other - Middle East	None of these define my ethnic group	Male	0- Exclusively heterosexual with no homosexual	34	1156
2	Condition 3	4b	4	b	80	18	Other/ University of hard knocks	Argentina	Other Oceanian Peoples	Male	3- Equally heterosexual and homosexual	43	1849
2	Condition 3	6b	6	b	35	18	Other/ University of hard knocks	Argentina	Other Oceanian Peoples	Male	3- Equally heterosexual and homosexual	25	625
2	Condition 3	8b	8	b	35	18	Other/ University of hard knocks	Argentina	Other Oceanian Peoples	Male	3- Equally heterosexual and homosexual	60	3600
2	Condition 3	10b	10	b	55	18	Other/ University of hard knocks	Argentina	Other Oceanian Peoples	Male	3- Equally heterosexual and homosexual	34	1156
2	Condition 3	13b	13	b	80	18	Other/ University of hard knocks	Argentina	Other Oceanian Peoples	Male	3- Equally heterosexual and homosexual	61	3721
2	Condition 3	14b	14	b	85	18	Other/ University of hard knocks	Argentina	Other Oceanian Peoples	Male	3- Equally heterosexual and homosexual	58	3364
262	Condition 3	1c	1	c	55	28	Post Graduate University Degree	Australia	North Western European, British or Irish	Male	0- Exclusively heterosexual with no homosexual	32	1024
262	Condition 3	5c	5	c	65	28	Post Graduate University Degree	Australia	North Western European, British or Irish	Male	0- Exclusively heterosexual with no homosexual	29	841
262	Condition 3	6c	6	c	60	28	Post Graduate University Degree	Australia	North Western European, British or Irish	Male	0- Exclusively heterosexual with no homosexual	25	625
262	Condition 3	14c	14	c	50	28	Post Graduate University Degree	Australia	North Western European, British or Irish	Male	0- Exclusively heterosexual with no homosexual	58	3364
262	Condition 3	16c	16	c	70	28	Post Graduate University Degree	Australia	North Western European, British or Irish	Male	0- Exclusively heterosexual with no homosexual	42	1764
262	Condition 3	18c	18	c	60	28	Post Graduate University Degree	Australia	North Western European, British or Irish	Male	0- Exclusively heterosexual with no homosexual	23	529
162	Condition 3	2c	2	c	45	18	Undergraduate University Degree	Australia	South East Asian	Female	0- Exclusively heterosexual with no homosexual	24	576
162	Condition 3	4c	4	c	65	18	Undergraduate University Degree	Australia	South East Asian	Female	0- Exclusively heterosexual with no homosexual	43	1849
162	Condition 3	6c	6	c	70	18	Undergraduate University Degree	Australia	South East Asian	Female	0- Exclusively heterosexual with no homosexual	25	625
162	Condition 3	9c	9	c	65	18	Undergraduate University Degree	Australia	South East Asian	Female	0- Exclusively heterosexual with no homosexual	34	1156
162	Condition 3	10c	10	c	50	18	Undergraduate University Degree	Australia	South East Asian	Female	0- Exclusively heterosexual with no homosexual	34	1156
162	Condition 3	14c	14	c	80	18	Undergraduate University Degree	Australia	South East Asian	Female	0- Exclusively heterosexual with no homosexual	58	3364
162	Condition 3	15c	15	c	55	18	Undergraduate University Degree	Australia	South East Asian	Female	0- Exclusively heterosexual with no homosexual	22	484
66	Condition 3	4c	4	c	50	28	Doctorate/PhD	Other - Middle East	None of these define my ethnic group	Male	0- Exclusively heterosexual with no homosexual	43	1849
66	Condition 3	8c	8	c	70	28	Doctorate/PhD	Other - Middle East	None of these define my ethnic group	Male	0- Exclusively heterosexual with no homosexual	60	3600
66	Condition 3	14c	14	c	75	28	Doctorate/PhD	Other - Middle East	None of these define my ethnic group	Male	0- Exclusively heterosexual with no homosexual	58	3364
66	Condition 3	15c	15	c	30	28	Doctorate/PhD	Other - Middle East	None of these define my ethnic group	Male	0- Exclusively heterosexual with no homosexual	22	484
66	Condition 3	16c	16	c	60	28	Doctorate/PhD	Other - Middle East	None of these define my ethnic group	Male	0- Exclusively heterosexual with no homosexual	42	1764
66	Condition 3	18c	18	c	55	28	Doctorate/PhD	Other - Middle East	None of these define my ethnic group	Male	0- Exclusively heterosexual with no homosexual	23	529
2	Condition 3	1c	1	c	55	18	Other/ University of hard knocks	Argentina	Other Oceanian Peoples	Male	3- Equally heterosexual and homosexual	32	1024
2	Condition 3	5c	5	c	40	18	Other/ University of hard knocks	Argentina	Other Oceanian Peoples	Male	3- Equally heterosexual and homosexual	29	841
2	Condition 3	7c	7	c	60	18	Other/ University of hard knocks	Argentina	Other Oceanian Peoples	Male	3- Equally heterosexual and homosexual	42	1764
2	Condition 3	9c	9	c	60	18	Other/ University of hard knocks	Argentina	Other Oceanian Peoples	Male	3- Equally heterosexual and homosexual	34	1156
2	Condition 3	15c	15	c	20	18	Other/ University of hard knocks	Argentina	Other Oceanian Peoples	Male	3- Equally heterosexual and homosexual	22	484
2	Condition 3	18c	18	c	45	18	Other/ University of hard knocks	Argentina	Other Oceanian Peoples	Male	3- Equally heterosexual and homosexual	23	529
1542	Condition 3	1a	1	a	70	18	Post Graduate University Degree	United States	North Western European, British or Irish	Male	2- Predominantly heterosexual, but more than incidentally homosexual	32	1024
1542	Condition 3	8a	8	a	20	18	Post Graduate University Degree	United States	North Western European, British or Irish	Male	2- Predominantly heterosexual, but more than incidentally homosexual	60	3600
1542	Condition 3	10a	10	a	75	18	Post Graduate University Degree	United States	North Western European, British or Irish	Male	2- Predominantly heterosexual, but more than incidentally homosexual	34	1156
1542	Condition 3	12a	12	a	60	18	Post Graduate University Degree	United States	North Western European, British or Irish	Male	2- Predominantly heterosexual, but more than incidentally homosexual	30	900
1542	Condition 3	14a	14	a	85	18	Post Graduate University Degree	United States	North Western European, British or Irish	Male	2- Predominantly heterosexual, but more than incidentally homosexual	58	3364
1542	Condition 3	16a	16	a	90	18	Post Graduate University Degree	United States	North Western European, British or Irish	Male	2- Predominantly heterosexual, but more than incidentally homosexual	42	1764
1542	Condition 3	2b	2	b	65	18	Post Graduate University Degree	United States	North Western European, British or Irish	Male	2- Predominantly heterosexual, but more than incidentally homosexual	24	576
1542	Condition 3	7b	7	b	65	18	Post Graduate University Degree	United States	North Western European, British or Irish	Male	2- Predominantly heterosexual, but more than incidentally homosexual	42	1764
1542	Condition 3	9b	9	b	65	18	Post Graduate University Degree	United States	North Western European, British or Irish	Male	2- Predominantly heterosexual, but more than incidentally homosexual	34	1156
1542	Condition 3	13b	13	b	55	18	Post Graduate University Degree	United States	North Western European, British or Irish	Male	2- Predominantly heterosexual, but more than incidentally homosexual	61	3721
1542	Condition 3	18b	18	b	10	18	Post Graduate University Degree	United States	North Western European, British or Irish	Male	2- Predominantly heterosexual, but more than incidentally homosexual	23	529
1542	Condition 3	4c	4	c	60	18	Post Graduate University Degree	United States	North Western European, British or Irish	Male	2- Predominantly heterosexual, but more than incidentally homosexual	43	1849
1542	Condition 3	5c	5	c	25	18	Post Graduate University Degree	United States	North Western European, British or Irish	Male	2- Predominantly heterosexual, but more than incidentally homosexual	29	841
1542	Condition 3	6c	6	c	25	18	Post Graduate University Degree	United States	North Western European, British or Irish	Male	2- Predominantly heterosexual, but more than incidentally homosexual	25	625
1542	Condition 3	15c	15	c	20	18	Post Graduate University Degree	United States	North Western European, British or Irish	Male	2- Predominantly heterosexual, but more than incidentally homosexual	22	484
1465	Condition 3	13a	13	a	85	18	Undergraduate University Degree	United States	None of these define my ethnic group	Female	0- Exclusively heterosexual with no homosexual	61	3721
1465	Condition 3	1b	1	b	70	18	Undergraduate University Degree	United States	None of these define my ethnic group	Female	0- Exclusively heterosexual with no homosexual	32	1024
1465	Condition 3	5b	5	b	60	18	Undergraduate University Degree	United States	None of these define my ethnic group	Female	0- Exclusively heterosexual with no homosexual	29	841
1465	Condition 3	6b	6	b	15	18	Undergraduate University Degree	United States	None of these define my ethnic group	Female	0- Exclusively heterosexual with no homosexual	25	625
1465	Condition 3	7b	7	b	40	18	Undergraduate University Degree	United States	None of these define my ethnic group	Female	0- Exclusively heterosexual with no homosexual	42	1764
1465	Condition 3	8b	8	b	35	18	Undergraduate University Degree	United States	None of these define my ethnic group	Female	0- Exclusively heterosexual with no homosexual	60	3600
1465	Condition 3	9b	9	b	60	18	Undergraduate University Degree	United States	None of these define my ethnic group	Female	0- Exclusively heterosexual with no homosexual	34	1156
1465	Condition 3	10b	10	b	60	18	Undergraduate University Degree	United States	None of these define my ethnic group	Female	0- Exclusively heterosexual with no homosexual	34	1156
1465	Condition 3	18b	18	b	15	18	Undergraduate University Degree	United States	None of these define my ethnic group	Female	0- Exclusively heterosexual with no homosexual	23	529
1465	Condition 3	2c	2	c	45	18	Undergraduate University Degree	United States	None of these define my ethnic group	Female	0- Exclusively heterosexual with no homosexual	24	576
1465	Condition 3	4c	4	c	45	18	Undergraduate University Degree	United States	None of these define my ethnic group	Female	0- Exclusively heterosexual with no homosexual	43	1849
1465	Condition 3	12c	12	c	55	18	Undergraduate University Degree	United States	None of these define my ethnic group	Female	0- Exclusively heterosexual with no homosexual	30	900
1465	Condition 3	14c	14	c	80	18	Undergraduate University Degree	United States	None of these define my ethnic group	Female	0- Exclusively heterosexual with no homosexual	58	3364
1465	Condition 3	15c	15	c	25	18	Undergraduate University Degree	United States	None of these define my ethnic group	Female	0- Exclusively heterosexual with no homosexual	22	484
1465	Condition 3	16c	16	c	65	18	Undergraduate University Degree	United States	None of these define my ethnic group	Female	0- Exclusively heterosexual with no homosexual	42	1764
1638	Condition 3	1a	1	a	60	18	High School	Mexico	None of these define my ethnic group	Female	3- Equally heterosexual and homosexual	32	1024
1638	Condition 3	2a	2	a	55	18	High School	Mexico	None of these define my ethnic group	Female	3- Equally heterosexual and homosexual	24	576
1638	Condition 3	6a	6	a	5	18	High School	Mexico	None of these define my ethnic group	Female	3- Equally heterosexual and homosexual	25	625
1638	Condition 3	9a	9	a	50	18	High School	Mexico	None of these define my ethnic group	Female	3- Equally heterosexual and homosexual	34	1156
1638	Condition 3	12a	12	a	30	18	High School	Mexico	None of these define my ethnic group	Female	3- Equally heterosexual and homosexual	30	900
1638	Condition 3	4b	4	b	50	18	High School	Mexico	None of these define my ethnic group	Female	3- Equally heterosexual and homosexual	43	1849
1638	Condition 3	5b	5	b	60	18	High School	Mexico	None of these define my ethnic group	Female	3- Equally heterosexual and homosexual	29	841
1638	Condition 3	7b	7	b	45	18	High School	Mexico	None of these define my ethnic group	Female	3- Equally heterosexual and homosexual	42	1764
1638	Condition 3	8b	8	b	0	18	High School	Mexico	None of these define my ethnic group	Female	3- Equally heterosexual and homosexual	60	3600
1638	Condition 3	14b	14	b	5	18	High School	Mexico	None of these define my ethnic group	Female	3- Equally heterosexual and homosexual	58	3364
1638	Condition 3	16b	16	b	25	18	High School	Mexico	None of these define my ethnic group	Female	3- Equally heterosexual and homosexual	42	1764
1638	Condition 3	10c	10	c	70	18	High School	Mexico	None of these define my ethnic group	Female	3- Equally heterosexual and homosexual	34	1156
1638	Condition 3	13c	13	c	10	18	High School	Mexico	None of these define my ethnic group	Female	3- Equally heterosexual and homosexual	61	3721
1638	Condition 3	15c	15	c	45	18	High School	Mexico	None of these define my ethnic group	Female	3- Equally heterosexual and homosexual	22	484
1638	Condition 3	18c	18	c	40	18	High School	Mexico	None of these define my ethnic group	Female	3- Equally heterosexual and homosexual	23	529
1978	Condition 3	4a	4	a	40	18	Diploma	United States	North Western European, British or Irish	Female	1- Predominantly heterosexual, only incidentally homosexual	43	1849
1978	Condition 3	7a	7	a	40	18	Diploma	United States	North Western European, British or Irish	Female	1- Predominantly heterosexual, only incidentally homosexual	42	1764
1978	Condition 3	13a	13	a	40	18	Diploma	United States	North Western European, British or Irish	Female	1- Predominantly heterosexual, only incidentally homosexual	61	3721
1978	Condition 3	14a	14	a	55	18	Diploma	United States	North Western European, British or Irish	Female	1- Predominantly heterosexual, only incidentally homosexual	58	3364
1978	Condition 3	18a	18	a	30	18	Diploma	United States	North Western European, British or Irish	Female	1- Predominantly heterosexual, only incidentally homosexual	23	529
1978	Condition 3	5b	5	b	50	18	Diploma	United States	North Western European, British or Irish	Female	1- Predominantly heterosexual, only incidentally homosexual	29	841
1978	Condition 3	6b	6	b	45	18	Diploma	United States	North Western European, British or Irish	Female	1- Predominantly heterosexual, only incidentally homosexual	25	625
1978	Condition 3	8b	8	b	30	18	Diploma	United States	North Western European, British or Irish	Female	1- Predominantly heterosexual, only incidentally homosexual	60	3600
1978	Condition 3	10b	10	b	40	18	Diploma	United States	North Western European, British or Irish	Female	1- Predominantly heterosexual, only incidentally homosexual	34	1156
1978	Condition 3	12b	12	b	35	18	Diploma	United States	North Western European, British or Irish	Female	1- Predominantly heterosexual, only incidentally homosexual	30	900
1978	Condition 3	1c	1	c	35	18	Diploma	United States	North Western European, British or Irish	Female	1- Predominantly heterosexual, only incidentally homosexual	32	1024
1978	Condition 3	2c	2	c	40	18	Diploma	United States	North Western European, British or Irish	Female	1- Predominantly heterosexual, only incidentally homosexual	24	576
1978	Condition 3	9c	9	c	35	18	Diploma	United States	North Western European, British or Irish	Female	1- Predominantly heterosexual, only incidentally homosexual	34	1156
1978	Condition 3	15c	15	c	40	18	Diploma	United States	North Western European, British or Irish	Female	1- Predominantly heterosexual, only incidentally homosexual	22	484
1978	Condition 3	16c	16	c	50	18	Diploma	United States	North Western European, British or Irish	Female	1- Predominantly heterosexual, only incidentally homosexual	42	1764
1374	Condition 3	4a	4	a	60	18	Post Graduate University Degree	Canada	Other North African or Middle Eastern	Male	0- Exclusively heterosexual with no homosexual	43	1849
1374	Condition 3	18a	18	a	50	18	Post Graduate University Degree	Canada	Other North African or Middle Eastern	Male	0- Exclusively heterosexual with no homosexual	23	529
1374	Condition 3	1b	1	b	50	18	Post Graduate University Degree	Canada	Other North African or Middle Eastern	Male	0- Exclusively heterosexual with no homosexual	32	1024
1374	Condition 3	5b	5	b	60	18	Post Graduate University Degree	Canada	Other North African or Middle Eastern	Male	0- Exclusively heterosexual with no homosexual	29	841
1374	Condition 3	6b	6	b	60	18	Post Graduate University Degree	Canada	Other North African or Middle Eastern	Male	0- Exclusively heterosexual with no homosexual	25	625
1374	Condition 3	7b	7	b	65	18	Post Graduate University Degree	Canada	Other North African or Middle Eastern	Male	0- Exclusively heterosexual with no homosexual	42	1764
1374	Condition 3	8b	8	b	10	18	Post Graduate University Degree	Canada	Other North African or Middle Eastern	Male	0- Exclusively heterosexual with no homosexual	60	3600
1374	Condition 3	15b	15	b	50	18	Post Graduate University Degree	Canada	Other North African or Middle Eastern	Male	0- Exclusively heterosexual with no homosexual	22	484
1374	Condition 3	2c	2	c	60	18	Post Graduate University Degree	Canada	Other North African or Middle Eastern	Male	0- Exclusively heterosexual with no homosexual	24	576
1374	Condition 3	9c	9	c	60	18	Post Graduate University Degree	Canada	Other North African or Middle Eastern	Male	0- Exclusively heterosexual with no homosexual	34	1156
1374	Condition 3	10c	10	c	60	18	Post Graduate University Degree	Canada	Other North African or Middle Eastern	Male	0- Exclusively heterosexual with no homosexual	34	1156
1374	Condition 3	12c	12	c	45	18	Post Graduate University Degree	Canada	Other North African or Middle Eastern	Male	0- Exclusively heterosexual with no homosexual	30	900
1374	Condition 3	13c	13	c	70	18	Post Graduate University Degree	Canada	Other North African or Middle Eastern	Male	0- Exclusively heterosexual with no homosexual	61	3721
1374	Condition 3	14c	14	c	60	18	Post Graduate University Degree	Canada	Other North African or Middle Eastern	Male	0- Exclusively heterosexual with no homosexual	58	3364
1374	Condition 3	16c	16	c	65	18	Post Graduate University Degree	Canada	Other North African or Middle Eastern	Male	0- Exclusively heterosexual with no homosexual	42	1764
1939	Condition 3	1a	1	a	50	18	Undergraduate University Degree	Canada	None of these define my ethnic group	Female	1- Predominantly heterosexual, only incidentally homosexual	32	1024
1939	Condition 3	9a	9	a	65	18	Undergraduate University Degree	Canada	None of these define my ethnic group	Female	1- Predominantly heterosexual, only incidentally homosexual	34	1156
1939	Condition 3	13a	13	a	65	18	Undergraduate University Degree	Canada	None of these define my ethnic group	Female	1- Predominantly heterosexual, only incidentally homosexual	61	3721
1939	Condition 3	14a	14	a	65	18	Undergraduate University Degree	Canada	None of these define my ethnic group	Female	1- Predominantly heterosexual, only incidentally homosexual	58	3364
1939	Condition 3	15a	15	a	40	18	Undergraduate University Degree	Canada	None of these define my ethnic group	Female	1- Predominantly heterosexual, only incidentally homosexual	22	484
1939	Condition 3	5b	5	b	45	18	Undergraduate University Degree	Canada	None of these define my ethnic group	Female	1- Predominantly heterosexual, only incidentally homosexual	29	841
1939	Condition 3	10b	10	b	60	18	Undergraduate University Degree	Canada	None of these define my ethnic group	Female	1- Predominantly heterosexual, only incidentally homosexual	34	1156
1939	Condition 3	16b	16	b	60	18	Undergraduate University Degree	Canada	None of these define my ethnic group	Female	1- Predominantly heterosexual, only incidentally homosexual	42	1764
1939	Condition 3	2c	2	c	55	18	Undergraduate University Degree	Canada	None of these define my ethnic group	Female	1- Predominantly heterosexual, only incidentally homosexual	24	576
1939	Condition 3	4c	4	c	60	18	Undergraduate University Degree	Canada	None of these define my ethnic group	Female	1- Predominantly heterosexual, only incidentally homosexual	43	1849
1939	Condition 3	6c	6	c	55	18	Undergraduate University Degree	Canada	None of these define my ethnic group	Female	1- Predominantly heterosexual, only incidentally homosexual	25	625
1939	Condition 3	7c	7	c	60	18	Undergraduate University Degree	Canada	None of these define my ethnic group	Female	1- Predominantly heterosexual, only incidentally homosexual	42	1764
1939	Condition 3	8c	8	c	65	18	Undergraduate University Degree	Canada	None of these define my ethnic group	Female	1- Predominantly heterosexual, only incidentally homosexual	60	3600
1939	Condition 3	12c	12	c	45	18	Undergraduate University Degree	Canada	None of these define my ethnic group	Female	1- Predominantly heterosexual, only incidentally homosexual	30	900
1939	Condition 3	18c	18	c	35	18	Undergraduate University Degree	Canada	None of these define my ethnic group	Female	1- Predominantly heterosexual, only incidentally homosexual	23	529
524	Condition 3	8a	8	a	40	18	Undergraduate University Degree	United States	European Mixed Race	Female	2- Predominantly heterosexual, but more than incidentally homosexual	60	3600
524	Condition 3	10a	10	a	60	18	Undergraduate University Degree	United States	European Mixed Race	Female	2- Predominantly heterosexual, but more than incidentally homosexual	34	1156
524	Condition 3	14a	14	a	55	18	Undergraduate University Degree	United States	European Mixed Race	Female	2- Predominantly heterosexual, but more than incidentally homosexual	58	3364
524	Condition 3	18a	18	a	35	18	Undergraduate University Degree	United States	European Mixed Race	Female	2- Predominantly heterosexual, but more than incidentally homosexual	23	529
524	Condition 3	1b	1	b	65	18	Undergraduate University Degree	United States	European Mixed Race	Female	2- Predominantly heterosexual, but more than incidentally homosexual	32	1024
524	Condition 3	4b	4	b	60	18	Undergraduate University Degree	United States	European Mixed Race	Female	2- Predominantly heterosexual, but more than incidentally homosexual	43	1849
524	Condition 3	5b	5	b	60	18	Undergraduate University Degree	United States	European Mixed Race	Female	2- Predominantly heterosexual, but more than incidentally homosexual	29	841
524	Condition 3	7b	7	b	45	18	Undergraduate University Degree	United States	European Mixed Race	Female	2- Predominantly heterosexual, but more than incidentally homosexual	42	1764
524	Condition 3	15b	15	b	50	18	Undergraduate University Degree	United States	European Mixed Race	Female	2- Predominantly heterosexual, but more than incidentally homosexual	22	484
524	Condition 3	16b	16	b	60	18	Undergraduate University Degree	United States	European Mixed Race	Female	2- Predominantly heterosexual, but more than incidentally homosexual	42	1764
524	Condition 3	2c	2	c	60	18	Undergraduate University Degree	United States	European Mixed Race	Female	2- Predominantly heterosexual, but more than incidentally homosexual	24	576
524	Condition 3	6c	6	c	55	18	Undergraduate University Degree	United States	European Mixed Race	Female	2- Predominantly heterosexual, but more than incidentally homosexual	25	625
524	Condition 3	9c	9	c	65	18	Undergraduate University Degree	United States	European Mixed Race	Female	2- Predominantly heterosexual, but more than incidentally homosexual	34	1156
524	Condition 3	12c	12	c	55	18	Undergraduate University Degree	United States	European Mixed Race	Female	2- Predominantly heterosexual, but more than incidentally homosexual	30	900
524	Condition 3	13c	13	c	60	18	Undergraduate University Degree	United States	European Mixed Race	Female	2- Predominantly heterosexual, but more than incidentally homosexual	61	3721
1655	Condition 3	4a	4	a	65	18	Post Graduate University Degree	Other - Southern America	None of these define my ethnic group	Male	1- Predominantly heterosexual, only incidentally homosexual	43	1849
1655	Condition 3	6a	6	a	40	18	Post Graduate University Degree	Other - Southern America	None of these define my ethnic group	Male	1- Predominantly heterosexual, only incidentally homosexual	25	625
1655	Condition 3	13a	13	a	80	18	Post Graduate University Degree	Other - Southern America	None of these define my ethnic group	Male	1- Predominantly heterosexual, only incidentally homosexual	61	3721
1655	Condition 3	2b	2	b	65	18	Post Graduate University Degree	Other - Southern America	None of these define my ethnic group	Male	1- Predominantly heterosexual, only incidentally homosexual	24	576
1655	Condition 3	5b	5	b	65	18	Post Graduate University Degree	Other - Southern America	None of these define my ethnic group	Male	1- Predominantly heterosexual, only incidentally homosexual	29	841
1655	Condition 3	7b	7	b	50	18	Post Graduate University Degree	Other - Southern America	None of these define my ethnic group	Male	1- Predominantly heterosexual, only incidentally homosexual	42	1764
1655	Condition 3	12b	12	b	20	18	Post Graduate University Degree	Other - Southern America	None of these define my ethnic group	Male	1- Predominantly heterosexual, only incidentally homosexual	30	900
1655	Condition 3	14b	14	b	70	18	Post Graduate University Degree	Other - Southern America	None of these define my ethnic group	Male	1- Predominantly heterosexual, only incidentally homosexual	58	3364
1655	Condition 3	15b	15	b	70	18	Post Graduate University Degree	Other - Southern America	None of these define my ethnic group	Male	1- Predominantly heterosexual, only incidentally homosexual	22	484
1655	Condition 3	1c	1	c	55	18	Post Graduate University Degree	Other - Southern America	None of these define my ethnic group	Male	1- Predominantly heterosexual, only incidentally homosexual	32	1024
1655	Condition 3	8c	8	c	35	18	Post Graduate University Degree	Other - Southern America	None of these define my ethnic group	Male	1- Predominantly heterosexual, only incidentally homosexual	60	3600
1655	Condition 3	9c	9	c	75	18	Post Graduate University Degree	Other - Southern America	None of these define my ethnic group	Male	1- Predominantly heterosexual, only incidentally homosexual	34	1156
1655	Condition 3	10c	10	c	60	18	Post Graduate University Degree	Other - Southern America	None of these define my ethnic group	Male	1- Predominantly heterosexual, only incidentally homosexual	34	1156
1655	Condition 3	16c	16	c	40	18	Post Graduate University Degree	Other - Southern America	None of these define my ethnic group	Male	1- Predominantly heterosexual, only incidentally homosexual	42	1764
1655	Condition 3	18c	18	c	35	18	Post Graduate University Degree	Other - Southern America	None of these define my ethnic group	Male	1- Predominantly heterosexual, only incidentally homosexual	23	529
1527	Condition 3	1a	1	a	60	18	Diploma	Other - Africa	Central and West Africa	Male	0- Exclusively heterosexual with no homosexual	32	1024
1527	Condition 3	2a	2	a	60	18	Diploma	Other - Africa	Central and West Africa	Male	0- Exclusively heterosexual with no homosexual	24	576
1527	Condition 3	7a	7	a	75	18	Diploma	Other - Africa	Central and West Africa	Male	0- Exclusively heterosexual with no homosexual	42	1764
1527	Condition 3	8a	8	a	70	18	Diploma	Other - Africa	Central and West Africa	Male	0- Exclusively heterosexual with no homosexual	60	3600
1527	Condition 3	15a	15	a	70	18	Diploma	Other - Africa	Central and West Africa	Male	0- Exclusively heterosexual with no homosexual	22	484
1527	Condition 3	18a	18	a	55	18	Diploma	Other - Africa	Central and West Africa	Male	0- Exclusively heterosexual with no homosexual	23	529
1527	Condition 3	5b	5	b	65	18	Diploma	Other - Africa	Central and West Africa	Male	0- Exclusively heterosexual with no homosexual	29	841
1527	Condition 3	6b	6	b	55	18	Diploma	Other - Africa	Central and West Africa	Male	0- Exclusively heterosexual with no homosexual	25	625
1527	Condition 3	10b	10	b	55	18	Diploma	Other - Africa	Central and West Africa	Male	0- Exclusively heterosexual with no homosexual	34	1156
1527	Condition 3	13b	13	b	75	18	Diploma	Other - Africa	Central and West Africa	Male	0- Exclusively heterosexual with no homosexual	61	3721
1527	Condition 3	14b	14	b	70	18	Diploma	Other - Africa	Central and West Africa	Male	0- Exclusively heterosexual with no homosexual	58	3364
1527	Condition 3	4c	4	c	70	18	Diploma	Other - Africa	Central and West Africa	Male	0- Exclusively heterosexual with no homosexual	43	1849
1527	Condition 3	9c	9	c	65	18	Diploma	Other - Africa	Central and West Africa	Male	0- Exclusively heterosexual with no homosexual	34	1156
1527	Condition 3	12c	12	c	55	18	Diploma	Other - Africa	Central and West Africa	Male	0- Exclusively heterosexual with no homosexual	30	900
1527	Condition 3	16c	16	c	60	18	Diploma	Other - Africa	Central and West Africa	Male	0- Exclusively heterosexual with no homosexual	42	1764
500	Condition 3	1a	1	a	70	18	Undergraduate University Degree	Canada	North Western European, British or Irish	Female	0- Exclusively heterosexual with no homosexual	32	1024
500	Condition 3	6a	6	a	50	18	Undergraduate University Degree	Canada	North Western European, British or Irish	Female	0- Exclusively heterosexual with no homosexual	25	625
500	Condition 3	10a	10	a	60	18	Undergraduate University Degree	Canada	North Western European, British or Irish	Female	0- Exclusively heterosexual with no homosexual	34	1156
500	Condition 3	4b	4	b	65	18	Undergraduate University Degree	Canada	North Western European, British or Irish	Female	0- Exclusively heterosexual with no homosexual	43	1849
500	Condition 3	9b	9	b	50	18	Undergraduate University Degree	Canada	North Western European, British or Irish	Female	0- Exclusively heterosexual with no homosexual	34	1156
500	Condition 3	12b	12	b	65	18	Undergraduate University Degree	Canada	North Western European, British or Irish	Female	0- Exclusively heterosexual with no homosexual	30	900
500	Condition 3	13b	13	b	40	18	Undergraduate University Degree	Canada	North Western European, British or Irish	Female	0- Exclusively heterosexual with no homosexual	61	3721
500	Condition 3	14b	14	b	65	18	Undergraduate University Degree	Canada	North Western European, British or Irish	Female	0- Exclusively heterosexual with no homosexual	58	3364
500	Condition 3	15b	15	b	50	18	Undergraduate University Degree	Canada	North Western European, British or Irish	Female	0- Exclusively heterosexual with no homosexual	22	484
500	Condition 3	16b	16	b	40	18	Undergraduate University Degree	Canada	North Western European, British or Irish	Female	0- Exclusively heterosexual with no homosexual	42	1764
500	Condition 3	2c	2	c	50	18	Undergraduate University Degree	Canada	North Western European, British or Irish	Female	0- Exclusively heterosexual with no homosexual	24	576
500	Condition 3	5c	5	c	65	18	Undergraduate University Degree	Canada	North Western European, British or Irish	Female	0- Exclusively heterosexual with no homosexual	29	841
500	Condition 3	7c	7	c	35	18	Undergraduate University Degree	Canada	North Western European, British or Irish	Female	0- Exclusively heterosexual with no homosexual	42	1764
500	Condition 3	8c	8	c	60	18	Undergraduate University Degree	Canada	North Western European, British or Irish	Female	0- Exclusively heterosexual with no homosexual	60	3600
500	Condition 3	18c	18	c	40	18	Undergraduate University Degree	Canada	North Western European, British or Irish	Female	0- Exclusively heterosexual with no homosexual	23	529
572	Condition 3	9a	9	a	45	18	High School	United States	North Western European, British or Irish	Female	2- Predominantly heterosexual, but more than incidentally homosexual	34	1156
572	Condition 3	10a	10	a	40	18	High School	United States	North Western European, British or Irish	Female	2- Predominantly heterosexual, but more than incidentally homosexual	34	1156
572	Condition 3	15a	15	a	60	18	High School	United States	North Western European, British or Irish	Female	2- Predominantly heterosexual, but more than incidentally homosexual	22	484
572	Condition 3	16a	16	a	50	18	High School	United States	North Western European, British or Irish	Female	2- Predominantly heterosexual, but more than incidentally homosexual	42	1764
572	Condition 3	18a	18	a	40	18	High School	United States	North Western European, British or Irish	Female	2- Predominantly heterosexual, but more than incidentally homosexual	23	529
572	Condition 3	1b	1	b	70	18	High School	United States	North Western European, British or Irish	Female	2- Predominantly heterosexual, but more than incidentally homosexual	32	1024
572	Condition 3	4b	4	b	55	18	High School	United States	North Western European, British or Irish	Female	2- Predominantly heterosexual, but more than incidentally homosexual	43	1849
572	Condition 3	5b	5	b	50	18	High School	United States	North Western European, British or Irish	Female	2- Predominantly heterosexual, but more than incidentally homosexual	29	841
572	Condition 3	8b	8	b	40	18	High School	United States	North Western European, British or Irish	Female	2- Predominantly heterosexual, but more than incidentally homosexual	60	3600
572	Condition 3	12b	12	b	50	18	High School	United States	North Western European, British or Irish	Female	2- Predominantly heterosexual, but more than incidentally homosexual	30	900
572	Condition 3	13b	13	b	65	18	High School	United States	North Western European, British or Irish	Female	2- Predominantly heterosexual, but more than incidentally homosexual	61	3721
572	Condition 3	2c	2	c	60	18	High School	United States	North Western European, British or Irish	Female	2- Predominantly heterosexual, but more than incidentally homosexual	24	576
572	Condition 3	6c	6	c	70	18	High School	United States	North Western European, British or Irish	Female	2- Predominantly heterosexual, but more than incidentally homosexual	25	625
572	Condition 3	7c	7	c	50	18	High School	United States	North Western European, British or Irish	Female	2- Predominantly heterosexual, but more than incidentally homosexual	42	1764
572	Condition 3	14c	14	c	75	18	High School	United States	North Western European, British or Irish	Female	2- Predominantly heterosexual, but more than incidentally homosexual	58	3364
1923	Condition 3	2a	2	a	50	18	High School	Australia	None of these define my ethnic group	Female	0- Exclusively heterosexual with no homosexual	24	576
1923	Condition 3	6a	6	a	85	18	High School	Australia	None of these define my ethnic group	Female	0- Exclusively heterosexual with no homosexual	25	625
1923	Condition 3	8a	8	a	25	18	High School	Australia	None of these define my ethnic group	Female	0- Exclusively heterosexual with no homosexual	60	3600
1923	Condition 3	10a	10	a	50	18	High School	Australia	None of these define my ethnic group	Female	0- Exclusively heterosexual with no homosexual	34	1156
1923	Condition 3	14a	14	a	30	18	High School	Australia	None of these define my ethnic group	Female	0- Exclusively heterosexual with no homosexual	58	3364
1923	Condition 3	18a	18	a	50	18	High School	Australia	None of these define my ethnic group	Female	0- Exclusively heterosexual with no homosexual	23	529
1923	Condition 3	4b	4	b	60	18	High School	Australia	None of these define my ethnic group	Female	0- Exclusively heterosexual with no homosexual	43	1849
1923	Condition 3	12b	12	b	55	18	High School	Australia	None of these define my ethnic group	Female	0- Exclusively heterosexual with no homosexual	30	900
1923	Condition 3	15b	15	b	65	18	High School	Australia	None of these define my ethnic group	Female	0- Exclusively heterosexual with no homosexual	22	484
1923	Condition 3	1c	1	c	50	18	High School	Australia	None of these define my ethnic group	Female	0- Exclusively heterosexual with no homosexual	32	1024
1923	Condition 3	5c	5	c	75	18	High School	Australia	None of these define my ethnic group	Female	0- Exclusively heterosexual with no homosexual	29	841
1923	Condition 3	7c	7	c	50	18	High School	Australia	None of these define my ethnic group	Female	0- Exclusively heterosexual with no homosexual	42	1764
1923	Condition 3	9c	9	c	50	18	High School	Australia	None of these define my ethnic group	Female	0- Exclusively heterosexual with no homosexual	34	1156
1923	Condition 3	13c	13	c	30	18	High School	Australia	None of these define my ethnic group	Female	0- Exclusively heterosexual with no homosexual	61	3721
1923	Condition 3	16c	16	c	75	18	High School	Australia	None of these define my ethnic group	Female	0- Exclusively heterosexual with no homosexual	42	1764
1540	Condition 3	5a	5	a	45	18	High School	Saudia Arabia	South East Asian	Male	1- Predominantly heterosexual, only incidentally homosexual	29	841
1540	Condition 3	6a	6	a	35	18	High School	Saudia Arabia	South East Asian	Male	1- Predominantly heterosexual, only incidentally homosexual	25	625
1540	Condition 3	7a	7	a	55	18	High School	Saudia Arabia	South East Asian	Male	1- Predominantly heterosexual, only incidentally homosexual	42	1764
1540	Condition 3	9a	9	a	75	18	High School	Saudia Arabia	South East Asian	Male	1- Predominantly heterosexual, only incidentally homosexual	34	1156
1540	Condition 3	10a	10	a	75	18	High School	Saudia Arabia	South East Asian	Male	1- Predominantly heterosexual, only incidentally homosexual	34	1156
1540	Condition 3	13a	13	a	95	18	High School	Saudia Arabia	South East Asian	Male	1- Predominantly heterosexual, only incidentally homosexual	61	3721
1540	Condition 3	14a	14	a	85	18	High School	Saudia Arabia	South East Asian	Male	1- Predominantly heterosexual, only incidentally homosexual	58	3364
1540	Condition 3	2b	2	b	30	18	High School	Saudia Arabia	South East Asian	Male	1- Predominantly heterosexual, only incidentally homosexual	24	576
1540	Condition 3	8b	8	b	15	18	High School	Saudia Arabia	South East Asian	Male	1- Predominantly heterosexual, only incidentally homosexual	60	3600
1540	Condition 3	12b	12	b	40	18	High School	Saudia Arabia	South East Asian	Male	1- Predominantly heterosexual, only incidentally homosexual	30	900
1540	Condition 3	16b	16	b	20	18	High School	Saudia Arabia	South East Asian	Male	1- Predominantly heterosexual, only incidentally homosexual	42	1764
1540	Condition 3	18b	18	b	45	18	High School	Saudia Arabia	South East Asian	Male	1- Predominantly heterosexual, only incidentally homosexual	23	529
1540	Condition 3	1c	1	c	40	18	High School	Saudia Arabia	South East Asian	Male	1- Predominantly heterosexual, only incidentally homosexual	32	1024
1540	Condition 3	4c	4	c	55	18	High School	Saudia Arabia	South East Asian	Male	1- Predominantly heterosexual, only incidentally homosexual	43	1849
1540	Condition 3	15c	15	c	40	18	High School	Saudia Arabia	South East Asian	Male	1- Predominantly heterosexual, only incidentally homosexual	22	484
1688	Condition 3	1a	1	a	65	18	High School	Croatia	South Eastern and Eastern European	Male	0- Exclusively heterosexual with no homosexual	32	1024
1688	Condition 3	5a	5	a	35	18	High School	Croatia	South Eastern and Eastern European	Male	0- Exclusively heterosexual with no homosexual	29	841
1688	Condition 3	9a	9	a	65	18	High School	Croatia	South Eastern and Eastern European	Male	0- Exclusively heterosexual with no homosexual	34	1156
1688	Condition 3	16a	16	a	45	18	High School	Croatia	South Eastern and Eastern European	Male	0- Exclusively heterosexual with no homosexual	42	1764
1688	Condition 3	4b	4	b	75	18	High School	Croatia	South Eastern and Eastern European	Male	0- Exclusively heterosexual with no homosexual	43	1849
1688	Condition 3	10b	10	b	35	18	High School	Croatia	South Eastern and Eastern European	Male	0- Exclusively heterosexual with no homosexual	34	1156
1688	Condition 3	12b	12	b	25	18	High School	Croatia	South Eastern and Eastern European	Male	0- Exclusively heterosexual with no homosexual	30	900
1688	Condition 3	13b	13	b	50	18	High School	Croatia	South Eastern and Eastern European	Male	0- Exclusively heterosexual with no homosexual	61	3721
1688	Condition 3	15b	15	b	30	18	High School	Croatia	South Eastern and Eastern European	Male	0- Exclusively heterosexual with no homosexual	22	484
1688	Condition 3	2c	2	c	35	18	High School	Croatia	South Eastern and Eastern European	Male	0- Exclusively heterosexual with no homosexual	24	576
1688	Condition 3	6c	6	c	60	18	High School	Croatia	South Eastern and Eastern European	Male	0- Exclusively heterosexual with no homosexual	25	625
1688	Condition 3	7c	7	c	20	18	High School	Croatia	South Eastern and Eastern European	Male	0- Exclusively heterosexual with no homosexual	42	1764
1688	Condition 3	8c	8	c	20	18	High School	Croatia	South Eastern and Eastern European	Male	0- Exclusively heterosexual with no homosexual	60	3600
1688	Condition 3	14c	14	c	70	18	High School	Croatia	South Eastern and Eastern European	Male	0- Exclusively heterosexual with no homosexual	58	3364
1688	Condition 3	18c	18	c	10	18	High School	Croatia	South Eastern and Eastern European	Male	0- Exclusively heterosexual with no homosexual	23	529
1932	Condition 3	1a	1	a	55	18	High School	United States	None of these define my ethnic group	Male	0- Exclusively heterosexual with no homosexual	32	1024
1932	Condition 3	4a	4	a	55	18	High School	United States	None of these define my ethnic group	Male	0- Exclusively heterosexual with no homosexual	43	1849
1932	Condition 3	5a	5	a	55	18	High School	United States	None of these define my ethnic group	Male	0- Exclusively heterosexual with no homosexual	29	841
1932	Condition 3	7a	7	a	55	18	High School	United States	None of these define my ethnic group	Male	0- Exclusively heterosexual with no homosexual	42	1764
1932	Condition 3	9a	9	a	55	18	High School	United States	None of these define my ethnic group	Male	0- Exclusively heterosexual with no homosexual	34	1156
1932	Condition 3	13a	13	a	55	18	High School	United States	None of these define my ethnic group	Male	0- Exclusively heterosexual with no homosexual	61	3721
1932	Condition 3	2b	2	b	65	18	High School	United States	None of these define my ethnic group	Male	0- Exclusively heterosexual with no homosexual	24	576
1932	Condition 3	8b	8	b	30	18	High School	United States	None of these define my ethnic group	Male	0- Exclusively heterosexual with no homosexual	60	3600
1932	Condition 3	10b	10	b	30	18	High School	United States	None of these define my ethnic group	Male	0- Exclusively heterosexual with no homosexual	34	1156
1932	Condition 3	12b	12	b	45	18	High School	United States	None of these define my ethnic group	Male	0- Exclusively heterosexual with no homosexual	30	900
1932	Condition 3	15b	15	b	35	18	High School	United States	None of these define my ethnic group	Male	0- Exclusively heterosexual with no homosexual	22	484
1932	Condition 3	6c	6	c	55	18	High School	United States	None of these define my ethnic group	Male	0- Exclusively heterosexual with no homosexual	25	625
1932	Condition 3	14c	14	c	65	18	High School	United States	None of these define my ethnic group	Male	0- Exclusively heterosexual with no homosexual	58	3364
1932	Condition 3	16c	16	c	55	18	High School	United States	None of these define my ethnic group	Male	0- Exclusively heterosexual with no homosexual	42	1764
1932	Condition 3	18c	18	c	40	18	High School	United States	None of these define my ethnic group	Male	0- Exclusively heterosexual with no homosexual	23	529
592	Condition 3	1a	1	a	55	18	High School	United States	European Mixed Race	Female	1- Predominantly heterosexual, only incidentally homosexual	32	1024
592	Condition 3	5a	5	a	80	18	High School	United States	European Mixed Race	Female	1- Predominantly heterosexual, only incidentally homosexual	29	841
592	Condition 3	10a	10	a	70	18	High School	United States	European Mixed Race	Female	1- Predominantly heterosexual, only incidentally homosexual	34	1156
592	Condition 3	15a	15	a	85	18	High School	United States	European Mixed Race	Female	1- Predominantly heterosexual, only incidentally homosexual	22	484
592	Condition 3	18a	18	a	60	18	High School	United States	European Mixed Race	Female	1- Predominantly heterosexual, only incidentally homosexual	23	529
592	Condition 3	6b	6	b	45	18	High School	United States	European Mixed Race	Female	1- Predominantly heterosexual, only incidentally homosexual	25	625
592	Condition 3	7b	7	b	70	18	High School	United States	European Mixed Race	Female	1- Predominantly heterosexual, only incidentally homosexual	42	1764
592	Condition 3	13b	13	b	65	18	High School	United States	European Mixed Race	Female	1- Predominantly heterosexual, only incidentally homosexual	61	3721
592	Condition 3	14b	14	b	70	18	High School	United States	European Mixed Race	Female	1- Predominantly heterosexual, only incidentally homosexual	58	3364
592	Condition 3	2c	2	c	75	18	High School	United States	European Mixed Race	Female	1- Predominantly heterosexual, only incidentally homosexual	24	576
592	Condition 3	4c	4	c	55	18	High School	United States	European Mixed Race	Female	1- Predominantly heterosexual, only incidentally homosexual	43	1849
592	Condition 3	8c	8	c	60	18	High School	United States	European Mixed Race	Female	1- Predominantly heterosexual, only incidentally homosexual	60	3600
592	Condition 3	9c	9	c	75	18	High School	United States	European Mixed Race	Female	1- Predominantly heterosexual, only incidentally homosexual	34	1156
592	Condition 3	12c	12	c	60	18	High School	United States	European Mixed Race	Female	1- Predominantly heterosexual, only incidentally homosexual	30	900
592	Condition 3	16c	16	c	70	18	High School	United States	European Mixed Race	Female	1- Predominantly heterosexual, only incidentally homosexual	42	1764
1447	Condition 3	2a	2	a	60	18	High School	United States	European Mixed Race	Female	1- Predominantly heterosexual, only incidentally homosexual	24	576
1447	Condition 3	15a	15	a	60	18	High School	United States	European Mixed Race	Female	1- Predominantly heterosexual, only incidentally homosexual	22	484
1447	Condition 3	7b	7	b	75	18	High School	United States	European Mixed Race	Female	1- Predominantly heterosexual, only incidentally homosexual	42	1764
1447	Condition 3	9b	9	b	70	18	High School	United States	European Mixed Race	Female	1- Predominantly heterosexual, only incidentally homosexual	34	1156
1447	Condition 3	10b	10	b	50	18	High School	United States	European Mixed Race	Female	1- Predominantly heterosexual, only incidentally homosexual	34	1156
1447	Condition 3	12b	12	b	50	18	High School	United States	European Mixed Race	Female	1- Predominantly heterosexual, only incidentally homosexual	30	900
1447	Condition 3	13b	13	b	80	18	High School	United States	European Mixed Race	Female	1- Predominantly heterosexual, only incidentally homosexual	61	3721
1447	Condition 3	18b	18	b	60	18	High School	United States	European Mixed Race	Female	1- Predominantly heterosexual, only incidentally homosexual	23	529
1447	Condition 3	1c	1	c	50	18	High School	United States	European Mixed Race	Female	1- Predominantly heterosexual, only incidentally homosexual	32	1024
1447	Condition 3	4c	4	c	45	18	High School	United States	European Mixed Race	Female	1- Predominantly heterosexual, only incidentally homosexual	43	1849
1447	Condition 3	5c	5	c	65	18	High School	United States	European Mixed Race	Female	1- Predominantly heterosexual, only incidentally homosexual	29	841
1447	Condition 3	6c	6	c	55	18	High School	United States	European Mixed Race	Female	1- Predominantly heterosexual, only incidentally homosexual	25	625
1447	Condition 3	8c	8	c	40	18	High School	United States	European Mixed Race	Female	1- Predominantly heterosexual, only incidentally homosexual	60	3600
1447	Condition 3	14c	14	c	60	18	High School	United States	European Mixed Race	Female	1- Predominantly heterosexual, only incidentally homosexual	58	3364
1447	Condition 3	16c	16	c	70	18	High School	United States	European Mixed Race	Female	1- Predominantly heterosexual, only incidentally homosexual	42	1764
215	Condition 3	1a	1	a	50	18	High School	Australia	Mixed Race Australian	Male	3- Equally heterosexual and homosexual	32	1024
215	Condition 3	10a	10	a	45	18	High School	Australia	Mixed Race Australian	Male	3- Equally heterosexual and homosexual	34	1156
215	Condition 3	18a	18	a	25	18	High School	Australia	Mixed Race Australian	Male	3- Equally heterosexual and homosexual	23	529
210	Condition 3	1a	1	a	50	18	High School	Australia	Other North-East Asian	Female	1- Predominantly heterosexual, only incidentally homosexual	32	1024
210	Condition 3	4a	4	a	60	18	High School	Australia	Other North-East Asian	Female	1- Predominantly heterosexual, only incidentally homosexual	43	1849
210	Condition 3	12a	12	a	50	18	High School	Australia	Other North-East Asian	Female	1- Predominantly heterosexual, only incidentally homosexual	30	900
210	Condition 3	16a	16	a	65	18	High School	Australia	Other North-East Asian	Female	1- Predominantly heterosexual, only incidentally homosexual	42	1764
210	Condition 3	18a	18	a	50	18	High School	Australia	Other North-East Asian	Female	1- Predominantly heterosexual, only incidentally homosexual	23	529
196	Condition 3	1a	1	a	40	18	Undergraduate University Degree	Australia	Chinese Asian	Male	0- Exclusively heterosexual with no homosexual	32	1024
196	Condition 3	2a	2	a	60	18	Undergraduate University Degree	Australia	Chinese Asian	Male	0- Exclusively heterosexual with no homosexual	24	576
196	Condition 3	6a	6	a	50	18	Undergraduate University Degree	Australia	Chinese Asian	Male	0- Exclusively heterosexual with no homosexual	25	625
196	Condition 3	18a	18	a	70	18	Undergraduate University Degree	Australia	Chinese Asian	Male	0- Exclusively heterosexual with no homosexual	23	529
189	Condition 3	1a	1	a	80	18	Undergraduate University Degree	Australia	Mixed Race Australian	Male	0- Exclusively heterosexual with no homosexual	32	1024
189	Condition 3	5a	5	a	50	18	Undergraduate University Degree	Australia	Mixed Race Australian	Male	0- Exclusively heterosexual with no homosexual	29	841
189	Condition 3	6a	6	a	65	18	Undergraduate University Degree	Australia	Mixed Race Australian	Male	0- Exclusively heterosexual with no homosexual	25	625
189	Condition 3	9a	9	a	75	18	Undergraduate University Degree	Australia	Mixed Race Australian	Male	0- Exclusively heterosexual with no homosexual	34	1156
189	Condition 3	10a	10	a	60	18	Undergraduate University Degree	Australia	Mixed Race Australian	Male	0- Exclusively heterosexual with no homosexual	34	1156
189	Condition 3	14a	14	a	60	18	Undergraduate University Degree	Australia	Mixed Race Australian	Male	0- Exclusively heterosexual with no homosexual	58	3364
181	Condition 3	1a	1	a	40	18	High School	Australia	South East Asian	Male	0- Exclusively heterosexual with no homosexual	32	1024
181	Condition 3	2a	2	a	20	18	High School	Australia	South East Asian	Male	0- Exclusively heterosexual with no homosexual	24	576
181	Condition 3	5a	5	a	55	18	High School	Australia	South East Asian	Male	0- Exclusively heterosexual with no homosexual	29	841
181	Condition 3	8a	8	a	15	18	High School	Australia	South East Asian	Male	0- Exclusively heterosexual with no homosexual	60	3600
181	Condition 3	13a	13	a	75	18	High School	Australia	South East Asian	Male	0- Exclusively heterosexual with no homosexual	61	3721
181	Condition 3	18a	18	a	30	18	High School	Australia	South East Asian	Male	0- Exclusively heterosexual with no homosexual	23	529
179	Condition 3	4a	4	a	80	18	Undergraduate University Degree	Australia	Other Asian or Mixed Race Asian	Female	0- Exclusively heterosexual with no homosexual	43	1849
179	Condition 3	6a	6	a	95	18	Undergraduate University Degree	Australia	Other Asian or Mixed Race Asian	Female	0- Exclusively heterosexual with no homosexual	25	625
179	Condition 3	7a	7	a	85	18	Undergraduate University Degree	Australia	Other Asian or Mixed Race Asian	Female	0- Exclusively heterosexual with no homosexual	42	1764
179	Condition 3	8a	8	a	65	18	Undergraduate University Degree	Australia	Other Asian or Mixed Race Asian	Female	0- Exclusively heterosexual with no homosexual	60	3600
179	Condition 3	10a	10	a	90	18	Undergraduate University Degree	Australia	Other Asian or Mixed Race Asian	Female	0- Exclusively heterosexual with no homosexual	34	1156
179	Condition 3	12a	12	a	85	18	Undergraduate University Degree	Australia	Other Asian or Mixed Race Asian	Female	0- Exclusively heterosexual with no homosexual	30	900
179	Condition 3	18a	18	a	75	18	Undergraduate University Degree	Australia	Other Asian or Mixed Race Asian	Female	0- Exclusively heterosexual with no homosexual	23	529
176	Condition 3	4a	4	a	55	18	High School	Australia	New Zealand Peoples	Female	2- Predominantly heterosexual, but more than incidentally homosexual	43	1849
176	Condition 3	5a	5	a	45	18	High School	Australia	New Zealand Peoples	Female	2- Predominantly heterosexual, but more than incidentally homosexual	29	841
169	Condition 3	2a	2	a	65	18	Undergraduate University Degree	Australia	South East Asian	Female	1- Predominantly heterosexual, only incidentally homosexual	24	576
169	Condition 3	5a	5	a	35	18	Undergraduate University Degree	Australia	South East Asian	Female	1- Predominantly heterosexual, only incidentally homosexual	29	841
169	Condition 3	6a	6	a	40	18	Undergraduate University Degree	Australia	South East Asian	Female	1- Predominantly heterosexual, only incidentally homosexual	25	625
169	Condition 3	7a	7	a	75	18	Undergraduate University Degree	Australia	South East Asian	Female	1- Predominantly heterosexual, only incidentally homosexual	42	1764
169	Condition 3	10a	10	a	80	18	Undergraduate University Degree	Australia	South East Asian	Female	1- Predominantly heterosexual, only incidentally homosexual	34	1156
169	Condition 3	12a	12	a	65	18	Undergraduate University Degree	Australia	South East Asian	Female	1- Predominantly heterosexual, only incidentally homosexual	30	900
169	Condition 3	13a	13	a	60	18	Undergraduate University Degree	Australia	South East Asian	Female	1- Predominantly heterosexual, only incidentally homosexual	61	3721
215	Condition 3	2b	2	b	60	18	High School	Australia	Mixed Race Australian	Male	3- Equally heterosexual and homosexual	24	576
215	Condition 3	4b	4	b	75	18	High School	Australia	Mixed Race Australian	Male	3- Equally heterosexual and homosexual	43	1849
215	Condition 3	12b	12	b	50	18	High School	Australia	Mixed Race Australian	Male	3- Equally heterosexual and homosexual	30	900
215	Condition 3	14b	14	b	75	18	High School	Australia	Mixed Race Australian	Male	3- Equally heterosexual and homosexual	58	3364
215	Condition 3	15b	15	b	40	18	High School	Australia	Mixed Race Australian	Male	3- Equally heterosexual and homosexual	22	484
215	Condition 3	16b	16	b	35	18	High School	Australia	Mixed Race Australian	Male	3- Equally heterosexual and homosexual	42	1764
210	Condition 3	5b	5	b	65	18	High School	Australia	Other North-East Asian	Female	1- Predominantly heterosexual, only incidentally homosexual	29	841
210	Condition 3	6b	6	b	50	18	High School	Australia	Other North-East Asian	Female	1- Predominantly heterosexual, only incidentally homosexual	25	625
210	Condition 3	10b	10	b	50	18	High School	Australia	Other North-East Asian	Female	1- Predominantly heterosexual, only incidentally homosexual	34	1156
210	Condition 3	14b	14	b	35	18	High School	Australia	Other North-East Asian	Female	1- Predominantly heterosexual, only incidentally homosexual	58	3364
210	Condition 3	15b	15	b	40	18	High School	Australia	Other North-East Asian	Female	1- Predominantly heterosexual, only incidentally homosexual	22	484
196	Condition 3	5b	5	b	45	18	Undergraduate University Degree	Australia	Chinese Asian	Male	0- Exclusively heterosexual with no homosexual	29	841
196	Condition 3	7b	7	b	60	18	Undergraduate University Degree	Australia	Chinese Asian	Male	0- Exclusively heterosexual with no homosexual	42	1764
196	Condition 3	9b	9	b	75	18	Undergraduate University Degree	Australia	Chinese Asian	Male	0- Exclusively heterosexual with no homosexual	34	1156
196	Condition 3	10b	10	b	40	18	Undergraduate University Degree	Australia	Chinese Asian	Male	0- Exclusively heterosexual with no homosexual	34	1156
196	Condition 3	12b	12	b	35	18	Undergraduate University Degree	Australia	Chinese Asian	Male	0- Exclusively heterosexual with no homosexual	30	900
196	Condition 3	14b	14	b	70	18	Undergraduate University Degree	Australia	Chinese Asian	Male	0- Exclusively heterosexual with no homosexual	58	3364
196	Condition 3	15b	15	b	35	18	Undergraduate University Degree	Australia	Chinese Asian	Male	0- Exclusively heterosexual with no homosexual	22	484
189	Condition 3	2b	2	b	70	18	Undergraduate University Degree	Australia	Mixed Race Australian	Male	0- Exclusively heterosexual with no homosexual	24	576
189	Condition 3	4b	4	b	85	18	Undergraduate University Degree	Australia	Mixed Race Australian	Male	0- Exclusively heterosexual with no homosexual	43	1849
189	Condition 3	8b	8	b	55	18	Undergraduate University Degree	Australia	Mixed Race Australian	Male	0- Exclusively heterosexual with no homosexual	60	3600
189	Condition 3	15b	15	b	85	18	Undergraduate University Degree	Australia	Mixed Race Australian	Male	0- Exclusively heterosexual with no homosexual	22	484
189	Condition 3	16b	16	b	70	18	Undergraduate University Degree	Australia	Mixed Race Australian	Male	0- Exclusively heterosexual with no homosexual	42	1764
189	Condition 3	18b	18	b	80	18	Undergraduate University Degree	Australia	Mixed Race Australian	Male	0- Exclusively heterosexual with no homosexual	23	529
181	Condition 3	4b	4	b	75	18	High School	Australia	South East Asian	Male	0- Exclusively heterosexual with no homosexual	43	1849
181	Condition 3	6b	6	b	50	18	High School	Australia	South East Asian	Male	0- Exclusively heterosexual with no homosexual	25	625
181	Condition 3	7b	7	b	30	18	High School	Australia	South East Asian	Male	0- Exclusively heterosexual with no homosexual	42	1764
181	Condition 3	10b	10	b	60	18	High School	Australia	South East Asian	Male	0- Exclusively heterosexual with no homosexual	34	1156
181	Condition 3	12b	12	b	15	18	High School	Australia	South East Asian	Male	0- Exclusively heterosexual with no homosexual	30	900
181	Condition 3	16b	16	b	35	18	High School	Australia	South East Asian	Male	0- Exclusively heterosexual with no homosexual	42	1764
179	Condition 3	1b	1	b	85	18	Undergraduate University Degree	Australia	Other Asian or Mixed Race Asian	Female	0- Exclusively heterosexual with no homosexual	32	1024
179	Condition 3	2b	2	b	75	18	Undergraduate University Degree	Australia	Other Asian or Mixed Race Asian	Female	0- Exclusively heterosexual with no homosexual	24	576
179	Condition 3	5b	5	b	90	18	Undergraduate University Degree	Australia	Other Asian or Mixed Race Asian	Female	0- Exclusively heterosexual with no homosexual	29	841
179	Condition 3	14b	14	b	80	18	Undergraduate University Degree	Australia	Other Asian or Mixed Race Asian	Female	0- Exclusively heterosexual with no homosexual	58	3364
179	Condition 3	16b	16	b	75	18	Undergraduate University Degree	Australia	Other Asian or Mixed Race Asian	Female	0- Exclusively heterosexual with no homosexual	42	1764
176	Condition 3	2b	2	b	70	18	High School	Australia	New Zealand Peoples	Female	2- Predominantly heterosexual, but more than incidentally homosexual	24	576
176	Condition 3	10b	10	b	70	18	High School	Australia	New Zealand Peoples	Female	2- Predominantly heterosexual, but more than incidentally homosexual	34	1156
176	Condition 3	12b	12	b	60	18	High School	Australia	New Zealand Peoples	Female	2- Predominantly heterosexual, but more than incidentally homosexual	30	900
176	Condition 3	13b	13	b	50	18	High School	Australia	New Zealand Peoples	Female	2- Predominantly heterosexual, but more than incidentally homosexual	61	3721
176	Condition 3	14b	14	b	80	18	High School	Australia	New Zealand Peoples	Female	2- Predominantly heterosexual, but more than incidentally homosexual	58	3364
176	Condition 3	15b	15	b	45	18	High School	Australia	New Zealand Peoples	Female	2- Predominantly heterosexual, but more than incidentally homosexual	22	484
169	Condition 3	1b	1	b	65	18	Undergraduate University Degree	Australia	South East Asian	Female	1- Predominantly heterosexual, only incidentally homosexual	32	1024
169	Condition 3	14b	14	b	65	18	Undergraduate University Degree	Australia	South East Asian	Female	1- Predominantly heterosexual, only incidentally homosexual	58	3364
169	Condition 3	16b	16	b	85	18	Undergraduate University Degree	Australia	South East Asian	Female	1- Predominantly heterosexual, only incidentally homosexual	42	1764
215	Condition 3	5c	5	c	90	18	High School	Australia	Mixed Race Australian	Male	3- Equally heterosexual and homosexual	29	841
215	Condition 3	6c	6	c	60	18	High School	Australia	Mixed Race Australian	Male	3- Equally heterosexual and homosexual	25	625
215	Condition 3	7c	7	c	65	18	High School	Australia	Mixed Race Australian	Male	3- Equally heterosexual and homosexual	42	1764
215	Condition 3	8c	8	c	20	18	High School	Australia	Mixed Race Australian	Male	3- Equally heterosexual and homosexual	60	3600
215	Condition 3	9c	9	c	55	18	High School	Australia	Mixed Race Australian	Male	3- Equally heterosexual and homosexual	34	1156
215	Condition 3	13c	13	c	30	18	High School	Australia	Mixed Race Australian	Male	3- Equally heterosexual and homosexual	61	3721
210	Condition 3	2c	2	c	40	18	High School	Australia	Other North-East Asian	Female	1- Predominantly heterosexual, only incidentally homosexual	24	576
210	Condition 3	7c	7	c	60	18	High School	Australia	Other North-East Asian	Female	1- Predominantly heterosexual, only incidentally homosexual	42	1764
210	Condition 3	8c	8	c	30	18	High School	Australia	Other North-East Asian	Female	1- Predominantly heterosexual, only incidentally homosexual	60	3600
210	Condition 3	9c	9	c	40	18	High School	Australia	Other North-East Asian	Female	1- Predominantly heterosexual, only incidentally homosexual	34	1156
210	Condition 3	13c	13	c	65	18	High School	Australia	Other North-East Asian	Female	1- Predominantly heterosexual, only incidentally homosexual	61	3721
196	Condition 3	4c	4	c	45	18	Undergraduate University Degree	Australia	Chinese Asian	Male	0- Exclusively heterosexual with no homosexual	43	1849
196	Condition 3	8c	8	c	20	18	Undergraduate University Degree	Australia	Chinese Asian	Male	0- Exclusively heterosexual with no homosexual	60	3600
196	Condition 3	13c	13	c	35	18	Undergraduate University Degree	Australia	Chinese Asian	Male	0- Exclusively heterosexual with no homosexual	61	3721
196	Condition 3	16c	16	c	90	18	Undergraduate University Degree	Australia	Chinese Asian	Male	0- Exclusively heterosexual with no homosexual	42	1764
189	Condition 3	7c	7	c	65	18	Undergraduate University Degree	Australia	Mixed Race Australian	Male	0- Exclusively heterosexual with no homosexual	42	1764
189	Condition 3	12c	12	c	70	18	Undergraduate University Degree	Australia	Mixed Race Australian	Male	0- Exclusively heterosexual with no homosexual	30	900
189	Condition 3	13c	13	c	55	18	Undergraduate University Degree	Australia	Mixed Race Australian	Male	0- Exclusively heterosexual with no homosexual	61	3721
181	Condition 3	9c	9	c	5	18	High School	Australia	South East Asian	Male	0- Exclusively heterosexual with no homosexual	34	1156
181	Condition 3	14c	14	c	85	18	High School	Australia	South East Asian	Male	0- Exclusively heterosexual with no homosexual	58	3364
181	Condition 3	15c	15	c	35	18	High School	Australia	South East Asian	Male	0- Exclusively heterosexual with no homosexual	22	484
179	Condition 3	9c	9	c	80	18	Undergraduate University Degree	Australia	Other Asian or Mixed Race Asian	Female	0- Exclusively heterosexual with no homosexual	34	1156
179	Condition 3	13c	13	c	85	18	Undergraduate University Degree	Australia	Other Asian or Mixed Race Asian	Female	0- Exclusively heterosexual with no homosexual	61	3721
179	Condition 3	15c	15	c	75	18	Undergraduate University Degree	Australia	Other Asian or Mixed Race Asian	Female	0- Exclusively heterosexual with no homosexual	22	484
176	Condition 3	1c	1	c	55	18	High School	Australia	New Zealand Peoples	Female	2- Predominantly heterosexual, but more than incidentally homosexual	32	1024
176	Condition 3	6c	6	c	60	18	High School	Australia	New Zealand Peoples	Female	2- Predominantly heterosexual, but more than incidentally homosexual	25	625
176	Condition 3	7c	7	c	40	18	High School	Australia	New Zealand Peoples	Female	2- Predominantly heterosexual, but more than incidentally homosexual	42	1764
176	Condition 3	8c	8	c	65	18	High School	Australia	New Zealand Peoples	Female	2- Predominantly heterosexual, but more than incidentally homosexual	60	3600
176	Condition 3	9c	9	c	35	18	High School	Australia	New Zealand Peoples	Female	2- Predominantly heterosexual, but more than incidentally homosexual	34	1156
176	Condition 3	16c	16	c	55	18	High School	Australia	New Zealand Peoples	Female	2- Predominantly heterosexual, but more than incidentally homosexual	42	1764
176	Condition 3	18c	18	c	25	18	High School	Australia	New Zealand Peoples	Female	2- Predominantly heterosexual, but more than incidentally homosexual	23	529
169	Condition 3	4c	4	c	75	18	Undergraduate University Degree	Australia	South East Asian	Female	1- Predominantly heterosexual, only incidentally homosexual	43	1849
169	Condition 3	8c	8	c	45	18	Undergraduate University Degree	Australia	South East Asian	Female	1- Predominantly heterosexual, only incidentally homosexual	60	3600
169	Condition 3	9c	9	c	80	18	Undergraduate University Degree	Australia	South East Asian	Female	1- Predominantly heterosexual, only incidentally homosexual	34	1156
169	Condition 3	15c	15	c	30	18	Undergraduate University Degree	Australia	South East Asian	Female	1- Predominantly heterosexual, only incidentally homosexual	22	484
169	Condition 3	18c	18	c	35	18	Undergraduate University Degree	Australia	South East Asian	Female	1- Predominantly heterosexual, only incidentally homosexual	23	529
1090	Condition 3	4a	4	a	45	18	High School	United States	None of these define my ethnic group	Female	3- Equally heterosexual and homosexual	43	1849
[truncated: 8,354 more rows]

## Sheet: Male Attractiveness
Subject	Condition	Model	Model ID	Treatment	Attractiveness	Participant Age	EducationLevel	Country of Residence	Ethnicity	Participant Sex	Kinsey Scale	Model Age
[truncated: 6,987 more rows]

[truncated: 1 more sheets: Male Status]
